# Supplementary material for: Efficient nickel-catalyzed phosphinylation of C–S bonds forming C–P bonds
Source: Royal Society of Chemistry journal article supplement (doi:10.1039/c6cc06048j), 2016-01-01

## *Supporting Information*

# **Efficient Nickel-catalyzed Phosphinylation of C-S Bonds Forming C-P Bonds**

JiaYang, † Jing Xiao, † Tieqiao Chen, \*† Shuang-Feng Yin\*† and Li-Biao Han\*‡

†State Key Laboratory of Chemo/Biosensing and Chemometrics, College of Chemistry and Chemical Engineering, Hunan University, Changsha 410082, China, and ‡National Institute of Advanced Industrial Science and Technology (AIST), Tsukuba, Ibaraki 305-8565, Japan

E-mail: chentieqiao@hnu.edu.cn

## **Table of Contents**

|                                                                                                               |         |
|---------------------------------------------------------------------------------------------------------------|---------|
| <b>1. General information</b>                                                                                 | S2      |
| <b>2. Typical procedure for the Efficient Nickel-catalyzed Phosphinylation of C-S Bonds Forming C-P Bonds</b> | S2–S3   |
| <b>3. <sup>31</sup>P NMR data of the reaction mixture</b>                                                     | S3–S8   |
| <b>4. Characterization and analytical data of products 3</b>                                                  | S9–S15  |
| <b>5. References</b>                                                                                          | S16     |
| <b>6. Copies of <sup>1</sup>H NMR, <sup>13</sup>C NMR and <sup>31</sup>P NMR spectra</b>                      | S17–S45 |
| <b>7. Copies of IR spectra</b>                                                                                | S46–S47 |

## 1. General information

All reactions were carried out in oven-dried Schlenk tubes under N<sub>2</sub> atmosphere. Dry solvents were obtained by purification according to standard methods. Reagents were used as received unless otherwise noted. Column chromatography was performed using Silica Gel 60 (particle size 37–54 μm). The pure products were obtained by means of column chromatography. <sup>1</sup>H NMR, <sup>13</sup>C NMR and <sup>31</sup>P NMR data were acquired on a 400MHz spectrometer (400 MHz for <sup>1</sup>H, 100 MHz for <sup>13</sup>C, and 162 MHz for <sup>31</sup>P NMR spectroscopy). Chemical shifts for <sup>1</sup>H NMR are referred to internal Me<sub>4</sub>Si (0 ppm) and reported as follows: chemical shift (δ ppm), multiplicity, coupling constant (Hz) and integration. Data for <sup>31</sup>P NMR were relative to H<sub>3</sub>PO<sub>4</sub> (85% solution in D<sub>2</sub>O, 0 ppm). HRMS were conducted in the Analytical Center at Hunan University, China.

## 2. Procedure for the Efficient Nickel-catalyzed Phosphinylation of C-S Bonds Forming C-P Bonds

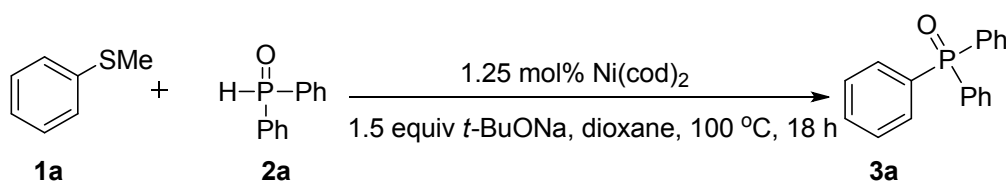

**Typical procedure:** In a glove box (O<sub>2</sub> < 0.5 ppm, H<sub>2</sub>O < 0.5 ppm), 0.4 mmol diphenylphosphine oxide **2a**, 1.25 mol% Ni(cod)<sub>2</sub>, 0.6 mmol *t*-BuONa and 1.0 mL dry dioxane were charged into a 10 mL schlenk tube. After the schlenk tube was taken out, 0.4 mmol methyl(phenyl)sulfane **1a** was added under N<sub>2</sub> atmosphere. Then the mixture was stirred at 100 °C for 18 h. After removal of the volatile, the residues were passed through a short silica chromatography (particle size 37–54 μm, pether/ethyl acetate as eluent) to afford analytically pure organophosphorus compounds **3a**.

**Procedure at 10 mmol scale:** In a glove box (O<sub>2</sub> < 0.5 ppm, H<sub>2</sub>O < 0.5 ppm), 10 mmol (2.021 g) diphenylphosphine oxide **2a**, 0.1 mol% (0.003 g) Ni(cod)<sub>2</sub>, 15 mmol (1.442 g) *t*-BuONa and 20 mL dry dioxane were charged into a 100 mL schlenk tube. After the tube was taken out, 10 mmol (1.242 g) methyl(phenyl)sulfane **1a** was added under N<sub>2</sub> atmosphere. Then the mixture was heated at 120 °C for 30 h. The mixture was extracted with CH<sub>2</sub>Cl<sub>2</sub>. The crude product after removing the

volatiles under a reduced pressure was passed through a short SiO<sub>2</sub> column using EtOAc as an eluent to give the spectroscopically pure **3a** in 92% yield (2.560 g).

### 3. <sup>31</sup>P NMR data of the reaction mixture

**Procedure:** In a glove box (O<sub>2</sub> < 0.5 ppm, H<sub>2</sub>O < 0.5 ppm), 1 mmol **2**, 1.25 mol% Ni(cod)<sub>2</sub>, 1.5 mmol *t*-BuONa (For *n*-Bu<sub>2</sub>POH, *t*-BuOK was used as a base) and 3.0 mL dry dioxane (due to the multiple sampling for one reaction, the solvent was enlarged) were charged into a 10 mL schlenk tube. After the schlenk tube was taken out, 1 mmol **1** (if solid, **1** was added in the glove box; for sulfones: 1.1 mmol was loaded) was added under N<sub>2</sub> atmosphere. Samples for <sup>31</sup>P NMR detection were acquired in a glove box.

#### Copies of <sup>31</sup>P NMR spectra

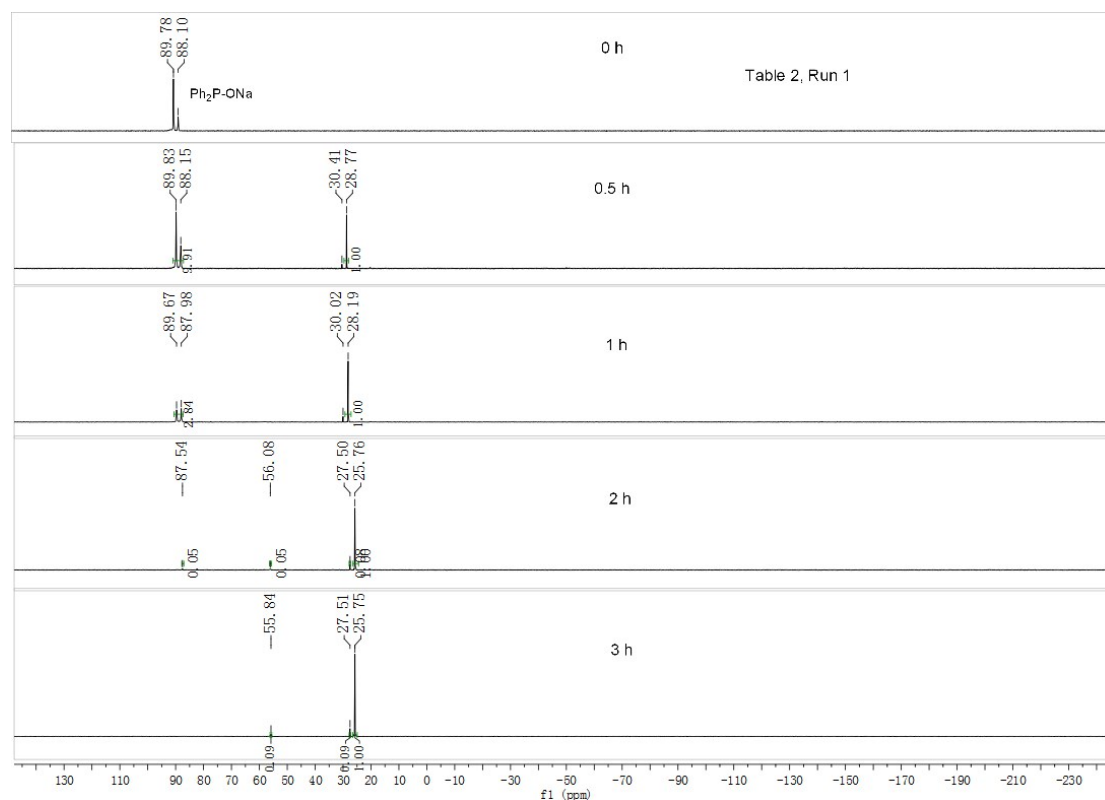

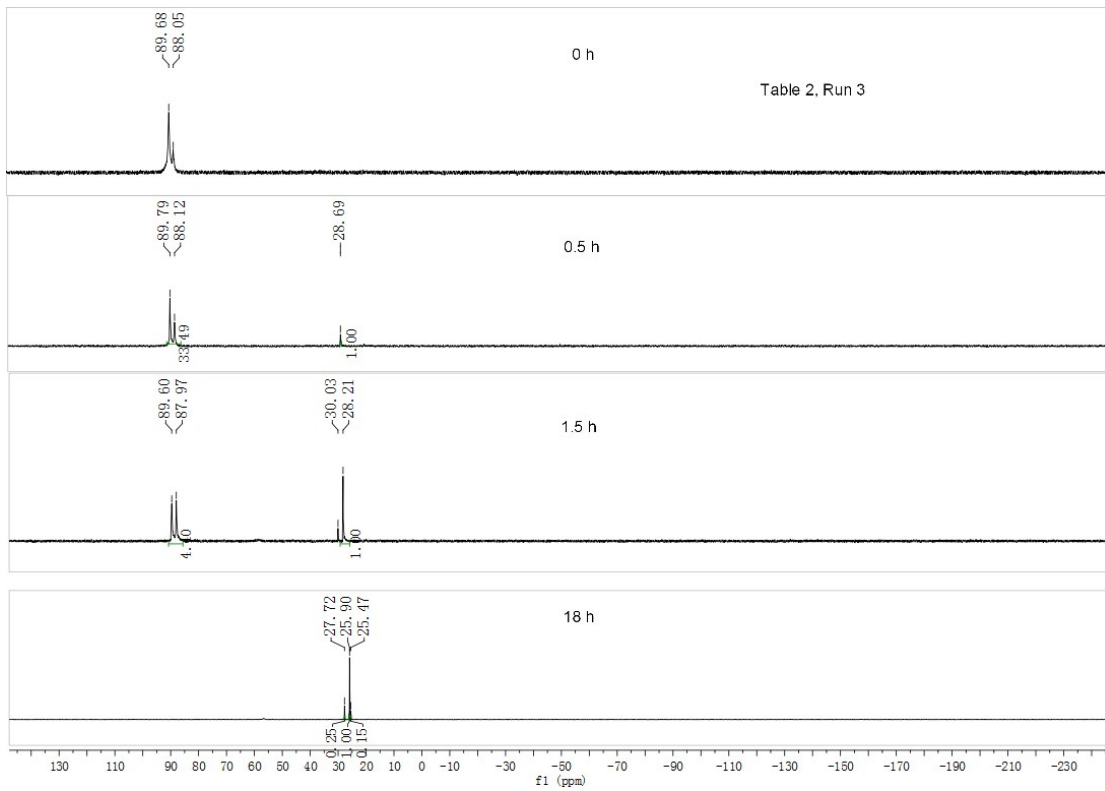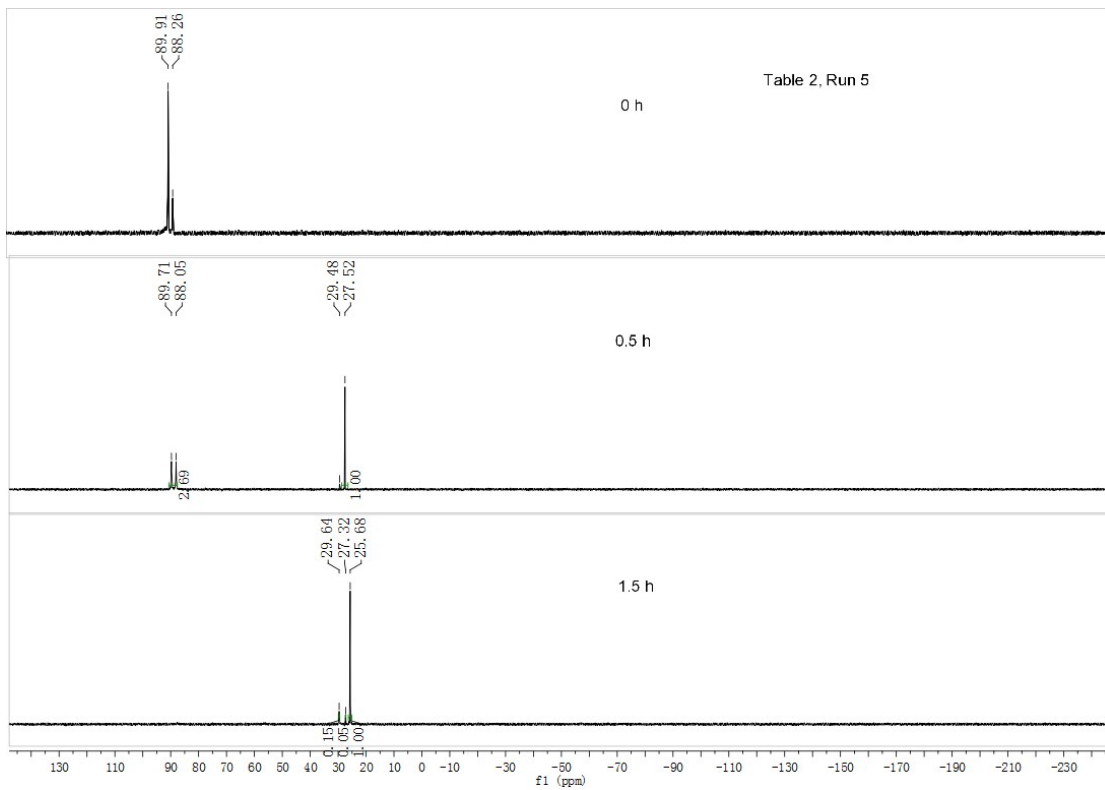

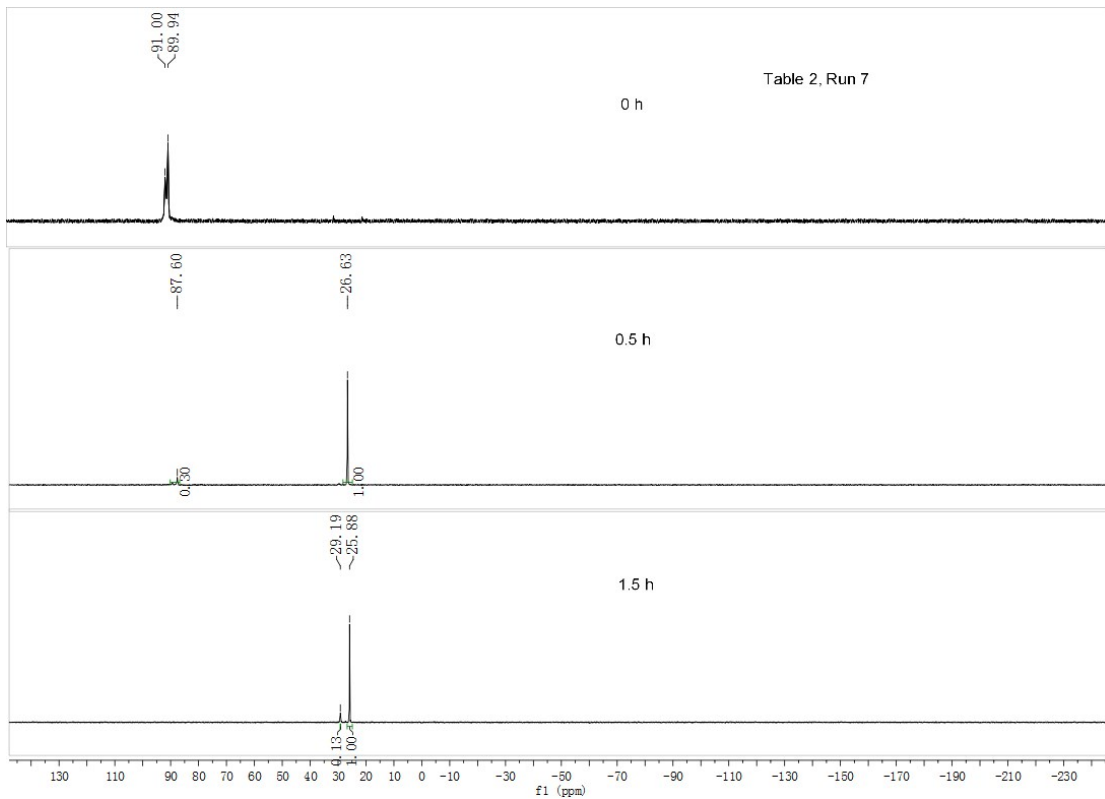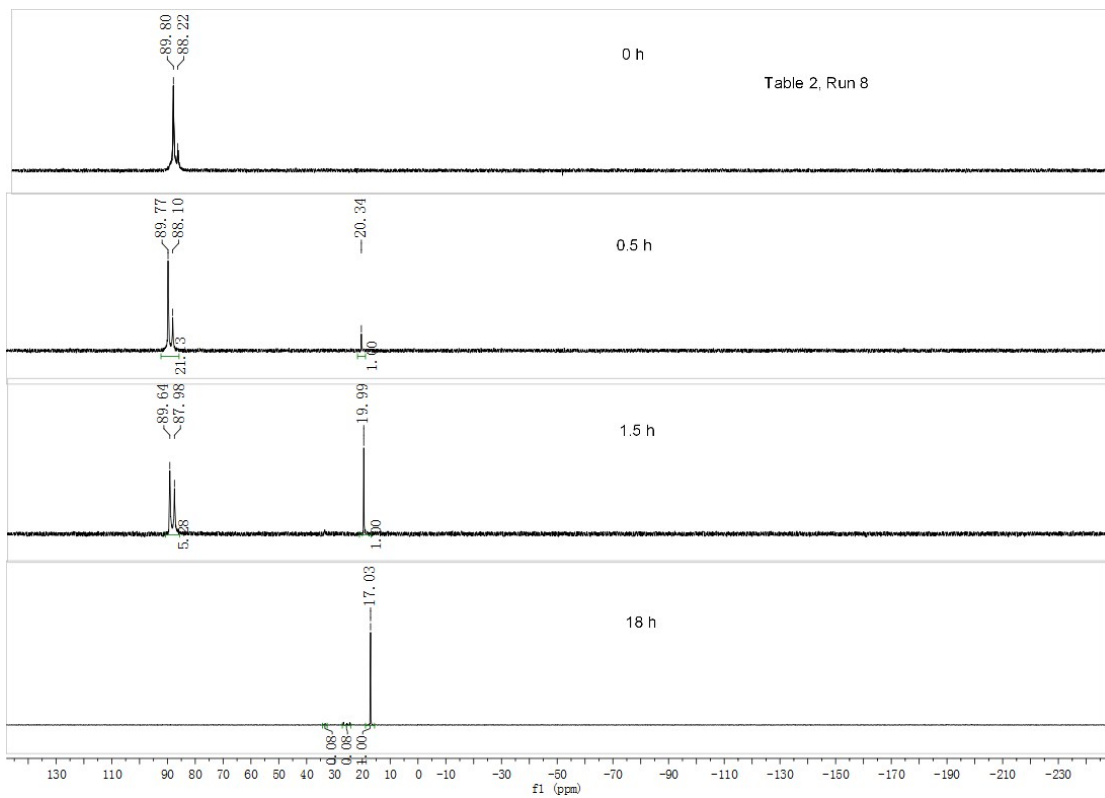

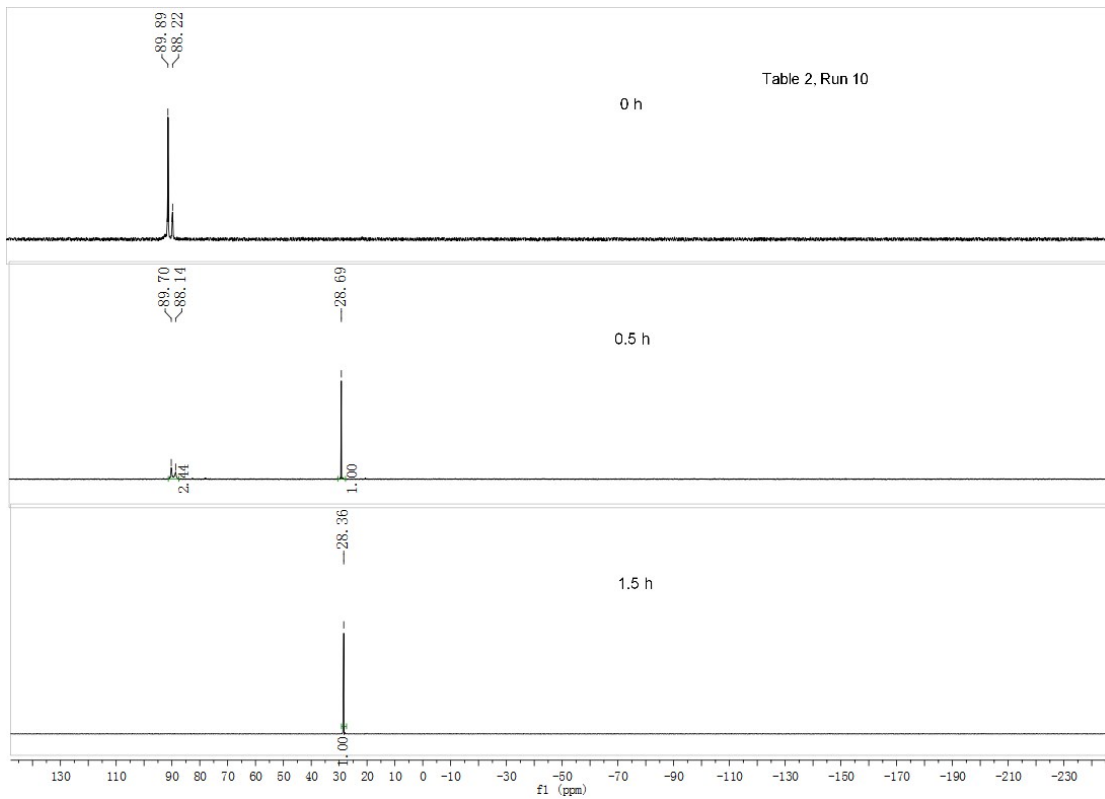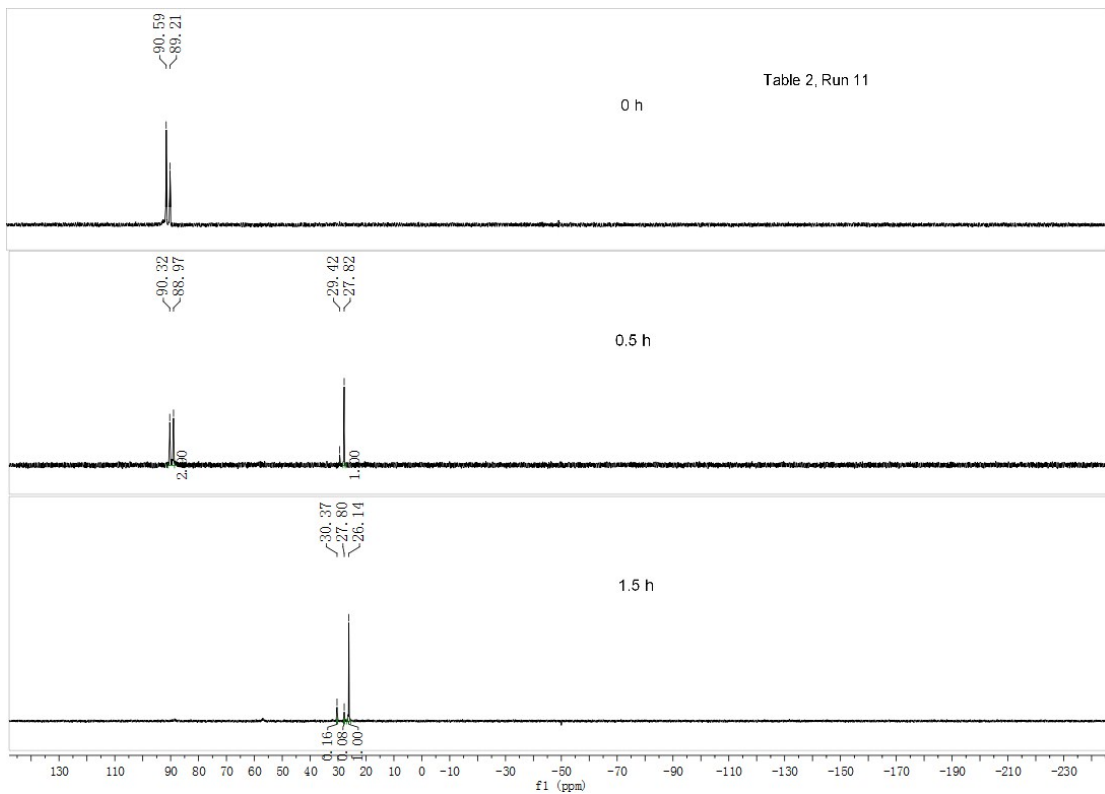

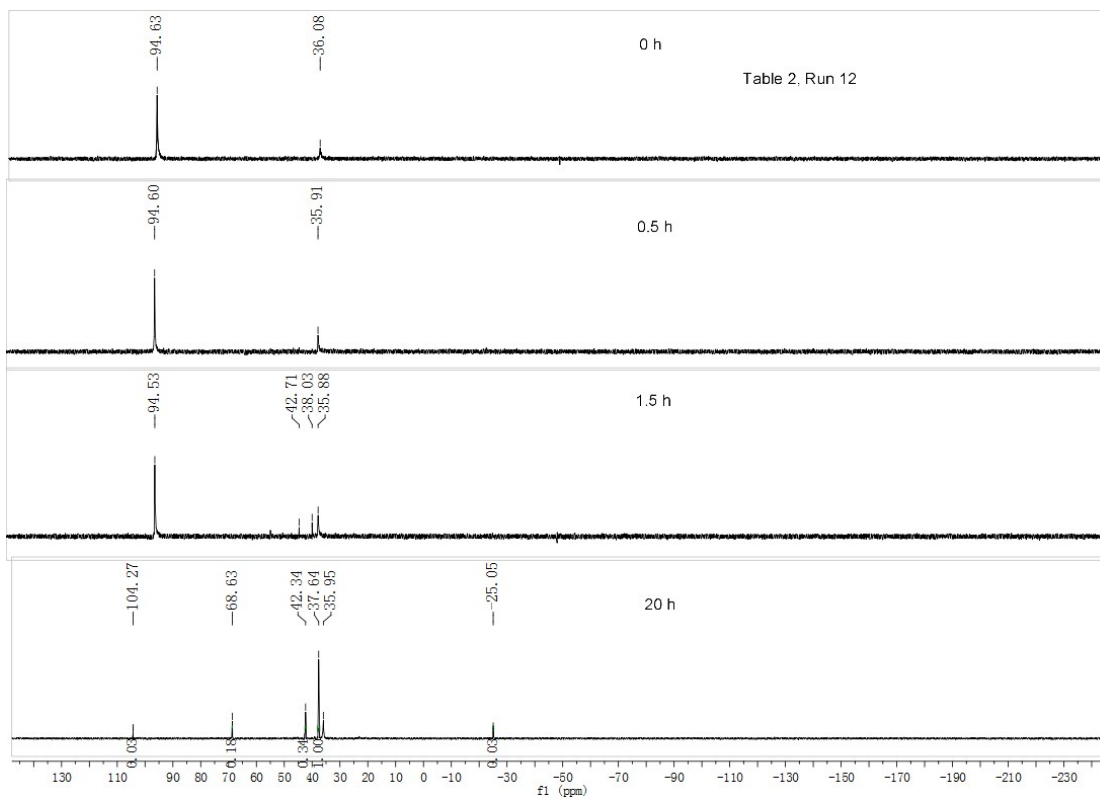

Note: the  $^{31}\text{P}$  signal of  $n\text{-Bu}_2\text{P}(\text{O})\text{K}$  is at 94.6 ppm, the  $^{31}\text{P}$  signal of  $n\text{-Bu}_2\text{P}(\text{O})\text{Ph}$  is at 37.6 ppm.

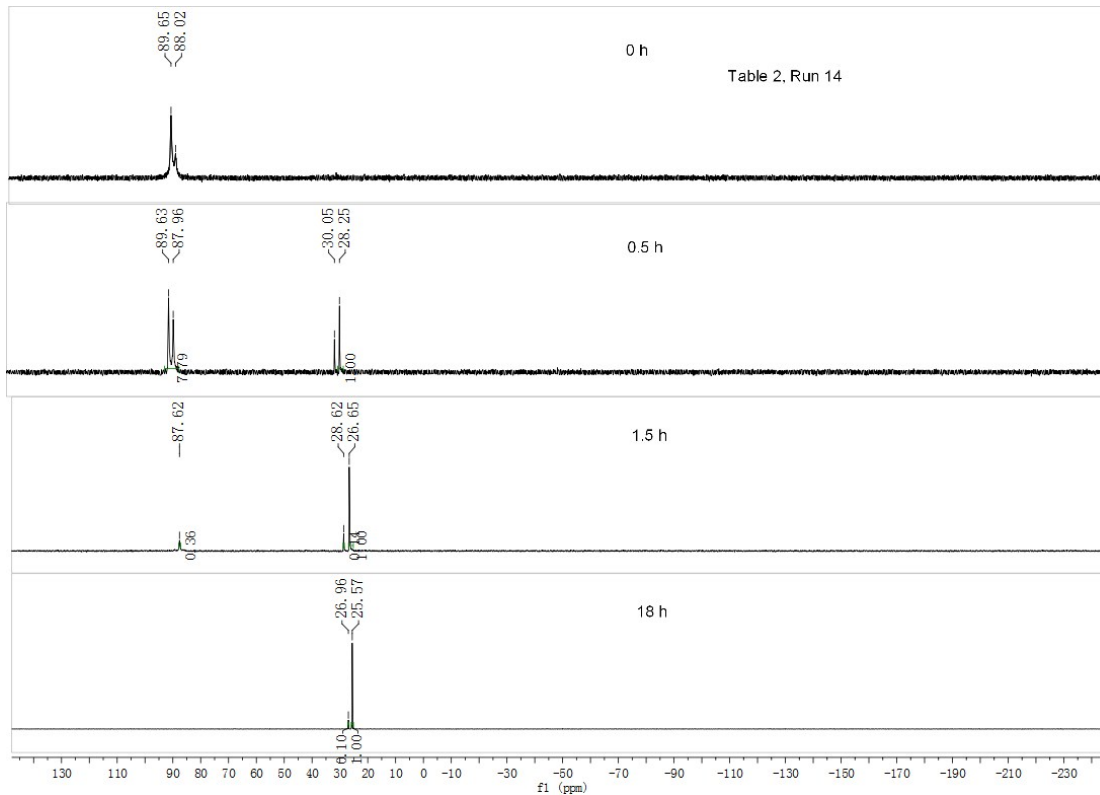

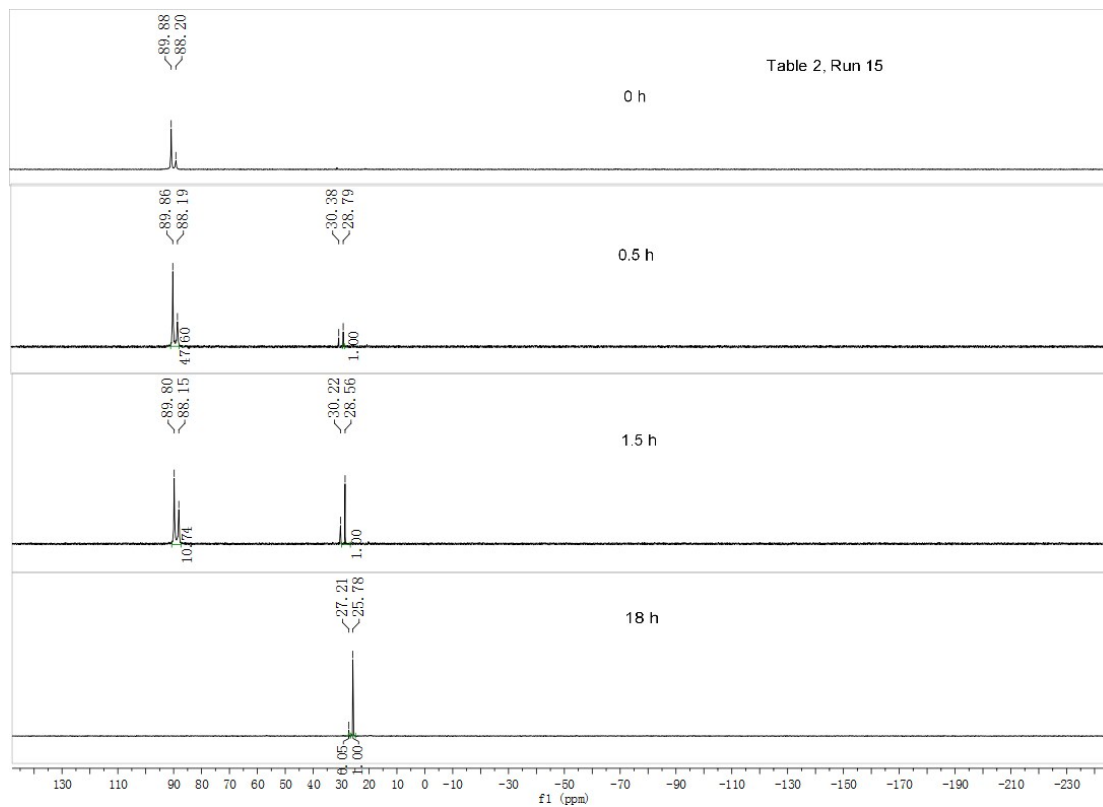



#### 4. Characterization and analytical data of products 3

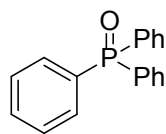

**Triphenylphosphine oxide (3a).**<sup>1</sup> White solid; <sup>1</sup>H NMR (400 MHz CDCl<sub>3</sub>):  $\delta$  7.70–7.65 (m, 6H), 7.57–7.53 (m, 3H), 7.48–7.44 (m, 6H). <sup>13</sup>C NMR (100 MHz CDCl<sub>3</sub>):  $\delta$  132.6 (d,  $J_{C-P}$  = 103.3 Hz), 132.1 (d,  $J_{C-P}$  = 9.8 Hz), 132.0 (d,  $J_{C-P}$  = 2.7 Hz), 128.5 (d,  $J_{C-P}$  = 12.0 Hz). <sup>31</sup>P NMR (162 MHz CDCl<sub>3</sub>):  $\delta$  29.16. MS (EI): 277.

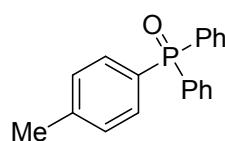

**Diphenyl(p-tolyl)phosphine oxide (3b).**<sup>1</sup> White solid; <sup>1</sup>H NMR (400 MHz CDCl<sub>3</sub>):  $\delta$  7.66 (dd,  $J$  = 8.0 Hz,  $J$  = 12.0 Hz, 4H), 7.58–7.50 (m, 4H), 7.46–7.43 (m, 4H), 7.26 (dd,  $J$  = 1.6 Hz,  $J$  = 8.0 Hz, 2H), 2.39 (s, 3H). <sup>13</sup>C NMR (100 MHz CDCl<sub>3</sub>):  $\delta$  142.5 (d,  $J_{C-P}$  = 2.6 Hz), 132.8 (d,  $J_{C-P}$  = 103.4 Hz), 132.1 (d,  $J_{C-P}$  = 10.1 Hz), 132.1 (d,  $J_{C-P}$  = 9.8 Hz), 131.8 (d,  $J_{C-P}$  = 2.7 Hz), 129.3 (d,  $J_{C-P}$  = 12.5 Hz), 129.1 (d,  $J_{C-P}$  = 106.0 Hz), 128.5 (d,  $J_{C-P}$  = 12.0 Hz), 21.6 (d,  $J_{C-P}$  = 0.9 Hz). <sup>31</sup>P NMR (162 MHz CDCl<sub>3</sub>):  $\delta$  29.23. MS (EI): 291.

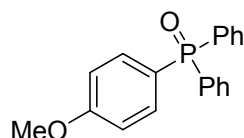

**(4-Methoxyphenyl)diphenylphosphine oxide (3c).**<sup>1</sup> White solid; <sup>1</sup>H NMR (400 MHz CDCl<sub>3</sub>):  $\delta$  7.66 (dd,  $J$  = 8.0 Hz,  $J$  = 12.0 Hz, 4H), 7.61–7.51 (m, 4H), 7.46–7.43 (m, 4H), 6.97 (dd,  $J$  = 2.0 Hz,  $J$  = 8.8 Hz, 2H), 3.84 (s, 3H). <sup>13</sup>C NMR (100 MHz CDCl<sub>3</sub>):  $\delta$  162.5 (d,  $J_{C-P}$  = 2.8 Hz), 134.0 (d,  $J_{C-P}$  = 11.2 Hz), 133.0 (d,  $J_{C-P}$  = 103.8 Hz), 132.0 (d,  $J_{C-P}$  = 9.8 Hz), 131.8 (d,  $J_{C-P}$  = 2.7 Hz), 128.5 (d,  $J_{C-P}$  = 12.0 Hz), 123.6 (d,  $J_{C-P}$  = 109.8 Hz), 114.1 (d,  $J_{C-P}$  = 13.1 Hz), 55.4. <sup>31</sup>P NMR (162 MHz CDCl<sub>3</sub>):  $\delta$  29.08. MS (EI): 307.

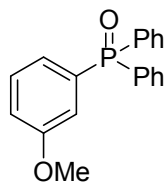

**(3-Methoxyphenyl)diphenylphosphine oxide (3d).**<sup>2</sup> White solid; <sup>1</sup>H NMR (400 MHz CDCl<sub>3</sub>): δ 7.66 (dd, *J* = 8.0 Hz, *J* = 12.0 Hz, 4H), 7.54 (t, *J* = 7.6 Hz, 2H), 7.48–7.44 (m, 4H), 7.38–7.33 (m, 1H), 7.39 (d, *J* = 13.2 Hz, 1H), 7.14 (dd, *J* = 7.6 Hz, *J* = 12.0 Hz, 1H), 7.07 (dd, *J* = 1.6 Hz, *J* = 8.0 Hz, 1H), 3.79 (s, 3H). <sup>13</sup>C NMR (100 MHz CDCl<sub>3</sub>): δ 159.6 (d, *J*<sub>C-P</sub> = 14.7 Hz), 133.8 (d, *J*<sub>C-P</sub> = 102.6 Hz), 132.4 (d, *J*<sub>C-P</sub> = 103.7 Hz), 132.1 (d, *J*<sub>C-P</sub> = 9.8 Hz), 132.0 (d, *J*<sub>C-P</sub> = 2.7 Hz), 129.7 (d, *J*<sub>C-P</sub> = 14.2 Hz), 128.5 (d, *J*<sub>C-P</sub> = 12.1 Hz), 124.4 (d, *J*<sub>C-P</sub> = 10.0 Hz), 118.2 (d, *J*<sub>C-P</sub> = 2.7 Hz), 116.8 (d, *J*<sub>C-P</sub> = 10.7 Hz), 55.4. <sup>31</sup>P NMR (162 MHz CDCl<sub>3</sub>): δ 29.31. MS (EI): 307.

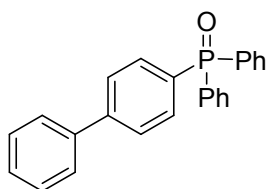

**[1,1'-Biphenyl]-4-ylidiphenylphosphine oxide (3e).**<sup>1</sup> White solid; <sup>1</sup>H NMR (400 MHz CDCl<sub>3</sub>): δ 7.79–7.68 (m, 8H), 7.61–7.54 (m, 4H), 7.50–7.37 (m, 7H). <sup>13</sup>C NMR (100 MHz CDCl<sub>3</sub>): δ 144.8 (d, *J*<sub>C-P</sub> = 2.6 Hz), 139.9, 132.6 (d, *J*<sub>C-P</sub> = 10.2 Hz), 132.5 (d, *J*<sub>C-P</sub> = 103.8 Hz), 132.1 (d, *J*<sub>C-P</sub> = 9.9 Hz), 132.0 (d, *J*<sub>C-P</sub> = 4.5 Hz), 131.0 (d, *J*<sub>C-P</sub> = 104.7 Hz), 130.0, 128.6 (d, *J*<sub>C-P</sub> = 12.1 Hz), 128.2, 127.3, 127.2. <sup>31</sup>P NMR (162 MHz CDCl<sub>3</sub>): δ 29.32. MS (EI): 353.

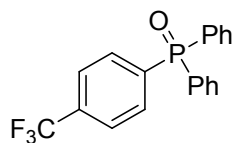

**diphenyl(4-(trifluoromethyl)phenyl)phosphine oxide (3f).**<sup>1</sup> White solid; <sup>1</sup>H NMR (400 MHz CDCl<sub>3</sub>): δ 7.75 (dd, *J* = 8.0 Hz, *J* = 11.2 Hz, 2H), 7.64 (d, *J* = 7.6 Hz, 2H), 7.58 (dd, *J* = 7.6 Hz, *J* = 12.0 Hz, 4H), 7.50 (t, *J* = 7.2 Hz, 2H), 7.42–7.39 (m, 4H). <sup>13</sup>C NMR (100 MHz CDCl<sub>3</sub>): δ 137.1 (d, *J*<sub>C-P</sub> = 99.3 Hz), 133.7 (dq, *J*<sub>C-P</sub> = 2.9 Hz, *J*<sub>C-F</sub> = 32.6 Hz), 132.6 (d, *J*<sub>C-P</sub> = 10.1 Hz), 132.4 (d, *J*<sub>C-P</sub> = 2.7 Hz), 132.0 (d, *J*<sub>C-P</sub> = 10.0 Hz), 131.6 (d, *J*<sub>C-P</sub> = 102.2 Hz), 128.8 (d, *J*<sub>C-P</sub> = 12.2 Hz), 125.4 (dq, *J*<sub>C-P</sub> = 12.1 Hz, *J*<sub>C-F</sub> = 3.5 Hz), 122.2 (q, *J*<sub>C-F</sub> = 271.2 Hz). <sup>31</sup>P NMR (162 MHz CDCl<sub>3</sub>):

$\delta$  28.15. MS (EI): 345.

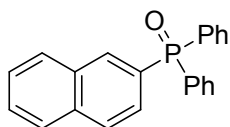

**Naphthalen-2-ylidiphenylphosphine oxide (3g).**<sup>1</sup> White solid; <sup>1</sup>H NMR (400 MHz CDCl<sub>3</sub>):  $\delta$  8.29 (d,  $J$  = 13.6 Hz, 1H), 7.91–7.86 (m, 3H), 7.72 (dd,  $J$  = 7.6 Hz,  $J$  = 12.0 Hz, 4H), 7.67–7.54 (m, 5H), 7.47 (dd,  $J$  = 7.6 Hz,  $J$  = 7.2 Hz, 4H). <sup>13</sup>C NMR (100 MHz CDCl<sub>3</sub>):  $\delta$  134.7 (d,  $J_{C-P}$  = 2.3 Hz), 134.1 (d,  $J_{C-P}$  = 9.3 Hz), 132.5 (d,  $J_{C-P}$  = 103.8 Hz), 132.4 (d,  $J_{C-P}$  = 13.1 Hz), 132.2 (d,  $J_{C-P}$  = 9.9 Hz), 132.1 (d,  $J_{C-P}$  = 2.6 Hz), 129.5 (d,  $J_{C-P}$  = 102.0 Hz), 129.0, 128.6 (d,  $J_{C-P}$  = 12.1 Hz), 128.3 (d,  $J_{C-P}$  = 11.6 Hz), 128.3, 127.9, 127.0, 126.9 (d,  $J_{C-P}$  = 10.6 Hz). <sup>31</sup>P NMR (162 MHz CDCl<sub>3</sub>):  $\delta$  29.42. MS (EI): 327.

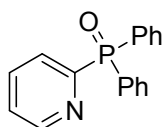

**Diphenyl(pyridin-2-yl)phosphine oxide (3h).**<sup>3</sup> White solid; <sup>1</sup>H NMR (400 MHz CDCl<sub>3</sub>):  $\delta$  8.77 (d,  $J$  = 4.0 Hz, 1H), 8.30 (t,  $J$  = 6.8 Hz, 1H), 7.91–7.81 (m, 5H), 7.52–7.37 (m, 7H). <sup>13</sup>C NMR (100 MHz CDCl<sub>3</sub>):  $\delta$  156.4 (d,  $J_{C-P}$  = 130.9 Hz), 150.2 (d,  $J_{C-P}$  = 19.0 Hz), 136.2 (d,  $J_{C-P}$  = 9.3 Hz), 132.2 (d,  $J_{C-P}$  = 103.4 Hz), 132.1 (d,  $J_{C-P}$  = 9.4 Hz), 131.9 (d,  $J_{C-P}$  = 2.8 Hz), 128.349 (d,  $J_{C-P}$  = 12.1 Hz), 128.346 (d,  $J_{C-P}$  = 19.8 Hz), 125.3 (d,  $J_{C-P}$  = 3.2 Hz). <sup>31</sup>P NMR (162 MHz CDCl<sub>3</sub>):  $\delta$  20.80. MS (EI): 278.

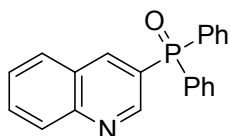

**Diphenyl(quinolin-3-yl)phosphine oxide (3i).**<sup>4</sup> White solid; <sup>1</sup>H NMR (400 MHz CDCl<sub>3</sub>):  $\delta$  9.02–9.00 (m, 1H), 8.64 (d,  $J$  = 13.2 Hz, 1H), 8.16 (d,  $J$  = 8.4 Hz, 1H), 7.89–7.82 (m, 2H), 7.73 (dd,  $J$  = 8.0 Hz,  $J$  = 12.0 Hz, 4H), 7.63–7.58 (m, 3H), 7.52–7.49 (dd,  $J$  = 7.2 Hz,  $J$  = 7.2 Hz, 4H). <sup>13</sup>C NMR (100 MHz CDCl<sub>3</sub>):  $\delta$  150.8 (d,  $J_{C-P}$  = 12.4 Hz), 149.1 (d,  $J_{C-P}$  = 1.3 Hz), 142.1 (d,  $J_{C-P}$  = 7.4 Hz), 132.5 (d,  $J_{C-P}$  = 2.8 Hz), 132.1 (d,  $J_{C-P}$  = 10.1 Hz), 131.9, 131.8 (d,  $J_{C-P}$  = 104.7 Hz), 129.5,

128.8 (d,  $J_{C-P} = 12.3$  Hz), 128.8, 127.7, 126.8 (d,  $J_{C-P} = 10.4$  Hz), 126.0 (d,  $J_{C-P} = 100.5$  Hz).  $^{31}\text{P}$  NMR (162 MHz  $\text{CDCl}_3$ ):  $\delta$  26.37. MS (EI): 328.

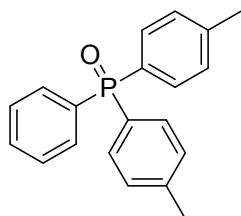

**Phenyldi-p-tolylphosphine oxide (3j).**<sup>1</sup> White solid;  $^1\text{H}$  NMR (400 MHz  $\text{CDCl}_3$ ):  $\delta$  7.65 (dd,  $J = 7.6$  Hz,  $J = 12.0$  Hz, 2H), 7.57–7.52 (m, 5H), 7.46–7.42 (m, 2H), 7.26 (d,  $J = 6.8$  Hz, 4H), 2.39 (s, 6H).  $^{13}\text{C}$  NMR (100 MHz  $\text{CDCl}_3$ ):  $\delta$  142.4 (d,  $J_{C-P} = 2.8$  Hz), 132.9 (d,  $J_{C-P} = 103.3$  Hz), 132.1 (d,  $J_{C-P} = 10.2$  Hz), 132.1 (d,  $J_{C-P} = 9.8$  Hz), 131.8 (d,  $J_{C-P} = 2.7$  Hz), 129.3 (d,  $J_{C-P} = 12.5$  Hz), 129.2 (d,  $J_{C-P} = 106.5$  Hz), 128.4 (d,  $J_{C-P} = 12.1$  Hz), 21.6 (d,  $J_{C-P} = 1.0$  Hz).  $^{31}\text{P}$  NMR (162 MHz  $\text{CDCl}_3$ ):  $\delta$  29.64. MS (EI): 305.

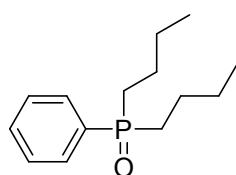

**Dibutyl(phenyl)phosphine oxide (3k).**<sup>1</sup> White solid;  $^1\text{H}$  NMR (400 MHz  $\text{CDCl}_3$ ):  $\delta$  7.70 (dd,  $J = 8.4$  Hz,  $J = 8.4$  Hz, 2H), 7.51 (b, 3H), 2.02–1.81 (m, 4H), 1.60 (br, 2H), 1.38 (br, 6H), 0.87 (t,  $J = 6.8$  Hz, 6H).  $^{13}\text{C}$  NMR (100 MHz  $\text{CDCl}_3$ ):  $\delta$  132.7 (d,  $J_{C-P} = 91.9$  Hz), 131.4 (d,  $J_{C-P} = 2.6$  Hz), 130.4 (d,  $J_{C-P} = 8.7$  Hz), 128.6 (d,  $J_{C-P} = 11.0$  Hz), 29.7 (d,  $J_{C-P} = 68.1$  Hz), 24.1 (d,  $J_{C-P} = 14.5$  Hz), 23.5 (d,  $J_{C-P} = 4.0$  Hz), 13.56.  $^{31}\text{P}$  NMR (162 MHz  $\text{CDCl}_3$ ):  $\delta$  40.71. MS (EI): 238.

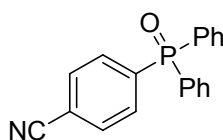

**4-(Diphenylphosphoryl)benzonitrile (3m).**<sup>3</sup> White solid;  $^1\text{H}$  NMR (400 MHz  $\text{CDCl}_3$ ):  $\delta$  7.84–7.75 (m, 4H), 7.68–7.58 (m, 6H), 7.52–7.49 (m, 4H).  $^{13}\text{C}$  NMR (100 MHz  $\text{CDCl}_3$ ):  $\delta$  138.3 (d,  $J_{C-P} = 99.0$  Hz), 132.7 (d,  $J_{C-P} = 5.3$  Hz), 132.6 (d,  $J_{C-P} = 1.6$  Hz), 132.0 (d,  $J_{C-P} = 11.9$  Hz), 132.0 (d,  $J_{C-P} = 10.0$  Hz), 131.0 (d,  $J_{C-P} = 105.0$  Hz), 128.9 (d,  $J_{C-P} = 12.3$  Hz), 117.9 (d,  $J_{C-P} = 1.3$  Hz),

115.7 (d,  $J_{C-P} = 3.1$  Hz).  $^{31}P$  NMR (162 MHz  $CDCl_3$ ):  $\delta$  28.20. MS (EI): 302.

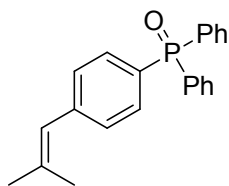

**(4-(2-Methylprop-1-en-1-yl)phenyl)diphenylphosphine oxide (3n)**. White solid, m.p. 125–126 °C;  $^1H$  NMR (400 MHz  $CDCl_3$ ):  $\delta$  7.71–7.66 (dd,  $J = 8.0$  Hz,  $J = 12.0$  Hz, 4H), 7.62–7.52 (m, 4H), 7.46 (dd,  $J = 7.2$  Hz,  $J = 7.2$  Hz, 4H), 7.31 (d,  $J = 6.8$  Hz, 2H), 6.27 (s, 1H), 1.92 (s, 3H), 1.87 (s, 3H).  $^{13}C$  NMR (100 MHz  $CDCl_3$ ):  $\delta$  142.5 (d,  $J_{C-P} = 2.8$  Hz), 138.2, 132.6 (d,  $J_{C-P} = 103.6$  Hz), 132.1 (d,  $J_{C-P} = 9.9$  Hz), 131.9 (d,  $J_{C-P} = 5.5$  Hz), 131.9 (d,  $J_{C-P} = 1.8$  Hz), 129.1 (d,  $J_{C-P} = 106.0$  Hz), 128.7 (d,  $J_{C-P} = 12.4$  Hz), 128.5 (d,  $J_{C-P} = 12.1$  Hz), 124.3 (d,  $J_{C-P} = 1.1$  Hz), 27.1, 19.6.  $^{31}P$  NMR (162 MHz  $CDCl_3$ ):  $\delta$  29.50. HRMS: Cal. for  $C_{22}H_{21}O_1P_1$  332.1330. Found [M] 332.1316. IR: 3056, 2929, 2912, 1653, 1183, 1119, 871, 721  $cm^{-1}$ .

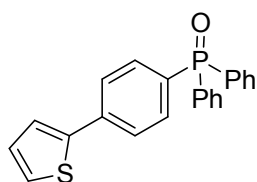

**Diphenyl(4-(thiophen-2-yl)phenyl)phosphine oxide (3o)**. Pale yellow oil;  $^1H$  NMR (400 MHz  $CDCl_3$ ):  $\delta$  7.72–7.64 (m, 8H), 7.55 (t,  $J = 7.6$  Hz, 2H), 7.49–7.45 (m, 4H), 7.39 (d,  $J = 3.6$  Hz, 1H), 7.33 (d,  $J = 4.8$  Hz, 1H), 7.09 (dd,  $J = 4.4$  Hz,  $J = 4.0$  Hz, 1H).  $^{13}C$  NMR (100 MHz  $CDCl_3$ ):  $\delta$  142.9 (d,  $J_{C-P} = 1.2$  Hz), 137.8 (d,  $J_{C-P} = 2.9$  Hz), 132.8 (d,  $J = 10.2$  Hz), 132.3 (d,  $J_{C-P} = 104.4$  Hz), 132.1 (d,  $J_{C-P} = 9.9$  Hz), 132.1 (d,  $J_{C-P} = 2.9$  Hz), 130.9 (d,  $J_{C-P} = 105.1$  Hz), 128.6 (d,  $J_{C-P} = 12.1$  Hz), 128.4, 126.3, 125.7 (d,  $J_{C-P} = 12.4$  Hz), 124.5.  $^{31}P$  NMR (162 MHz  $CDCl_3$ ):  $\delta$  29.30. HRMS: Cal. for  $C_{22}H_{17}O_1P_1S_1$  360.0738. Found 360.0723. IR: 3055, 1433, 1181, 1117, 733, 697  $cm^{-1}$ .

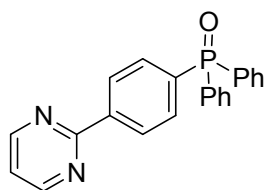

**Diphenyl(4-(pyrimidin-2-yl)phenyl)phosphine oxide (3p)**. White solid; m.p.: 181–182 °C,  $^1H$

NMR (400 MHz CDCl<sub>3</sub>):  $\delta$  8.83 (d,  $J$  = 4.8 Hz, 2H), 8.54 (d,  $J$  = 7.2 Hz, 2H), 7.82 (dd,  $J$  = 8.4 Hz,  $J$  = 11.4 Hz, 2H), 7.71 (dd,  $J$  = 7.6 Hz,  $J$  = 12.0 Hz, 4H), 7.56 (t,  $J$  = 7.6 Hz, 2H), 7.48 (dd,  $J$  = 6.4 Hz,  $J$  = 6.4 Hz, 4H), 7.24 (d,  $J_{C-P}$  = 4.8 Hz, 1H). <sup>13</sup>C NMR (100 MHz CDCl<sub>3</sub>):  $\delta$  163.8, 157.4, 140.9 (d,  $J_{C-P}$  = 2.8 Hz), 134.8 (d,  $J_{C-P}$  = 102.4 Hz), 132.4 (d,  $J_{C-P}$  = 10.0 Hz), 132.4 (d,  $J_{C-P}$  = 103.8 Hz), 132.1 (d,  $J_{C-P}$  = 9.8 Hz), 132.1, 128.6 (d,  $J_{C-P}$  = 12.1 Hz), 128.1 (d,  $J_{C-P}$  = 12.2 Hz), 119.8. <sup>31</sup>P NMR (162 MHz CDCl<sub>3</sub>):  $\delta$  28.96. HRMS: Cal. for C<sub>22</sub>H<sub>17</sub>O<sub>1</sub>N<sub>2</sub>P<sub>1</sub> 356.1078. Found [M-H] 355.0987. IR: 3030, 1559, 1419, 1183, 1116, 708 cm<sup>-1</sup>.

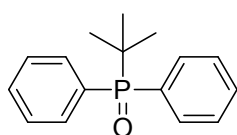

**Tert-butylidiphenylphosphine oxide (3q).**<sup>1</sup> White solid; <sup>1</sup>H NMR (400 MHz CDCl<sub>3</sub>):  $\delta$  7.96 (dd,  $J$  = 8.8 Hz,  $J$  = 8.8 Hz, 4H), 7.54–7.46 (m, 6H), 1.25 (d,  $J$  = 15.2 Hz, 9H). <sup>13</sup>C NMR (100 MHz CDCl<sub>3</sub>):  $\delta$  132.2 (d,  $J_{C-P}$  = 8.1 Hz), 131.5 (d,  $J_{C-P}$  = 2.6 Hz), 131.2 (d,  $J_{C-P}$  = 89.8 Hz), 128.3 (d,  $J_{C-P}$  = 10.8 Hz), 34.0 (d,  $J_{C-P}$  = 70.5 Hz), 25.2. <sup>31</sup>P NMR (162 MHz CDCl<sub>3</sub>):  $\delta$  38.73. MS (EI): 258.

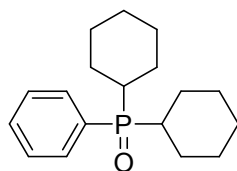

**Dicyclohexyl(phenyl)phosphine oxide (3r).**<sup>5</sup> White solid; <sup>1</sup>H NMR (400 MHz CDCl<sub>3</sub>):  $\delta$  7.59 (t,  $J$  = 7.60 Hz, 2H), 7.45–7.40 (m, 3H), 1.98 (br, 4H), 1.75–1.53 (m, 8H), 1.24–1.05 (m, 10H). <sup>13</sup>C NMR (100 MHz CDCl<sub>3</sub>):  $\delta$  131.5 (d,  $J_{C-P}$  = 7.6 Hz), 131.2 (d,  $J_{C-P}$  = 1.8 Hz), 129.9 (d,  $J_{C-P}$  = 84.3 Hz), 128.3 (d,  $J_{C-P}$  = 10.3 Hz), 35.1 (d,  $J_{C-P}$  = 66.9 Hz), 26.5 (d,  $J_{C-P}$  = 11.6 Hz), 26.4 (d,  $J_{C-P}$  = 11.8 Hz), 25.8, 25.5, 24.6 (d,  $J_{C-P}$  = 2.9 Hz). <sup>31</sup>P NMR (162 MHz CDCl<sub>3</sub>):  $\delta$  45.40. MS (EI): 289.

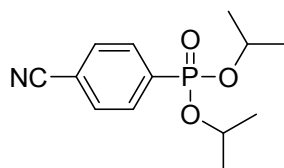

**Diisopropyl (4-cyanophenyl)phosphonate (3s).**<sup>6</sup> Colorless oil; <sup>1</sup>H NMR (400 MHz CDCl<sub>3</sub>):  $\delta$

7.95–7.90 (m, 2H), 7.76–7.73 (m, 2H), 4.78–4.70 (m, 2H), 1.39 (d,  $J = 6.0$  Hz, 6H), 1.24 (d,  $J = 6.0$  Hz, 6H).  $^{13}\text{C}$  NMR (100 MHz  $\text{CDCl}_3$ ):  $\delta$  135.5 (d,  $J_{\text{C-P}} = 187.3$  Hz), 132.2 (d,  $J_{\text{C-P}} = 9.7$  Hz), 131.9 (d,  $J_{\text{C-P}} = 14.9$  Hz), 118.0 (d,  $J_{\text{C-P}} = 1.3$  Hz), 115.7 (d,  $J_{\text{C-P}} = 3.4$  Hz), 71.7 (d,  $J_{\text{C-P}} = 5.8$  Hz), 24.0 (d,  $J_{\text{C-P}} = 4.1$  Hz), 23.9 (d,  $J_{\text{C-P}} = 4.7$  Hz).  $^{31}\text{P}$  NMR (162 MHz  $\text{CDCl}_3$ ):  $\delta$  13.11. MS (EI): 267.

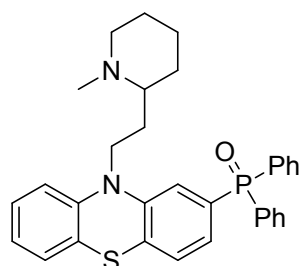

**(10-(2-(1-Methylpiperidin-2-yl)ethyl)-10H-phenothiazin-2-yl)diphenylphosphine oxide (3t).**

Colorless oil;  $^1\text{H}$  NMR (400 MHz  $\text{CDCl}_3$ ):  $\delta$  7.66 (dd,  $J = 7.6$  Hz,  $J = 10.8$  Hz, 4H), 7.63–7.46 (m, 6H), 7.28–7.11 (m, 4H), 7.05–7.00 (m, 1H), 7.96–7.86 (m, 2H), 3.93–3.75 (m, 2H), 2.84 (d,  $J = 11.6$  Hz, 1H), 2.14–2.05 (m, 6H), 1.80–1.59 (m, 5H), 1.38–1.28 (m, 2H).  $^{13}\text{C}$  NMR (100 MHz  $\text{CDCl}_3$ ):  $\delta$  145.4 (d,  $J_{\text{C-P}} = 14.0$  Hz), 144.6, 132.9 (d,  $J_{\text{C-P}} = 6.8$  Hz), 132.1, 132.0 (d,  $J_{\text{C-P}} = 10.0$  Hz), 132.0, 131.9 (d,  $J_{\text{C-P}} = 3.4$  Hz), 131.3 (d,  $J_{\text{C-P}} = 100.9$  Hz), 130.9 (d,  $J_{\text{C-P}} = 2.9$  Hz), 128.6 (d,  $J_{\text{C-P}} = 12.1$  Hz), 128.1 (d,  $J_{\text{C-P}} = 105.7$  Hz), 127.7 (d,  $J_{\text{C-P}} = 15.3$  Hz), 127.3 (d,  $J_{\text{C-P}} = 14.2$  Hz), 127.3 (d,  $J_{\text{C-P}} = 8.8$  Hz), 126.1 (d,  $J_{\text{C-P}} = 10.8$  Hz), 124.2, 123.1, 118.3 (d,  $J_{\text{C-P}} = 11.1$  Hz), 116.0, 62.0, 57.0, 43.9, 42.5, 30.2, 29.2, 25.1, 23.7.  $^{31}\text{P}$  NMR (162 MHz  $\text{CDCl}_3$ ):  $\delta$  29.50. HRMS: Cal. for  $\text{C}_{32}\text{H}_{33}\text{O}_1\text{N}_2\text{P}_1\text{S}_1$  524.2051. Found 524.2044. IR: 3055, 2931, 2852, 1458, 1402, 1180, 1118, 751, 697  $\text{cm}^{-1}$ .

## 5. References

- (1) J.-S. Zhang, T. Chen, J. Yang, L.-B. Han, *Chem. Comm.*, 2015, **51**, 7540.
- (2) X. Zhang, H. Liu, X. Hu, G. Tang, J. Zhu, Y. Zhao, *Org. Lett.*, 2011, **13**, 3478.
- (3) Y.-L. Zhao, G.-J. Wu, F.-S. Han, *Chem. Commun.*, 2012, **48**, 5868.
- (4) Y.-L. Zhao, G.-J. Wu, Y. Li, L.-X. Gao, F.-S. Han, *Chem. Eur. J.*, 2012, **18**, 9622.
- (5) R. Berrino, S. Cacchi, G. Fabrizi, A. Goggiamani, P. Stabile, *Org. Biomol. Chem.*, 2010, **8**, 4518.
- (6) Belabassi, Y.; Alzghari, S.; Montchamp, J.-L. *J. Organometallic Chem.*, 2008, **693**, 3178.



## 6. Copies of $^1\text{H}$ NMR, $^{13}\text{C}$ NMR and $^{31}\text{P}$ NMR spectra

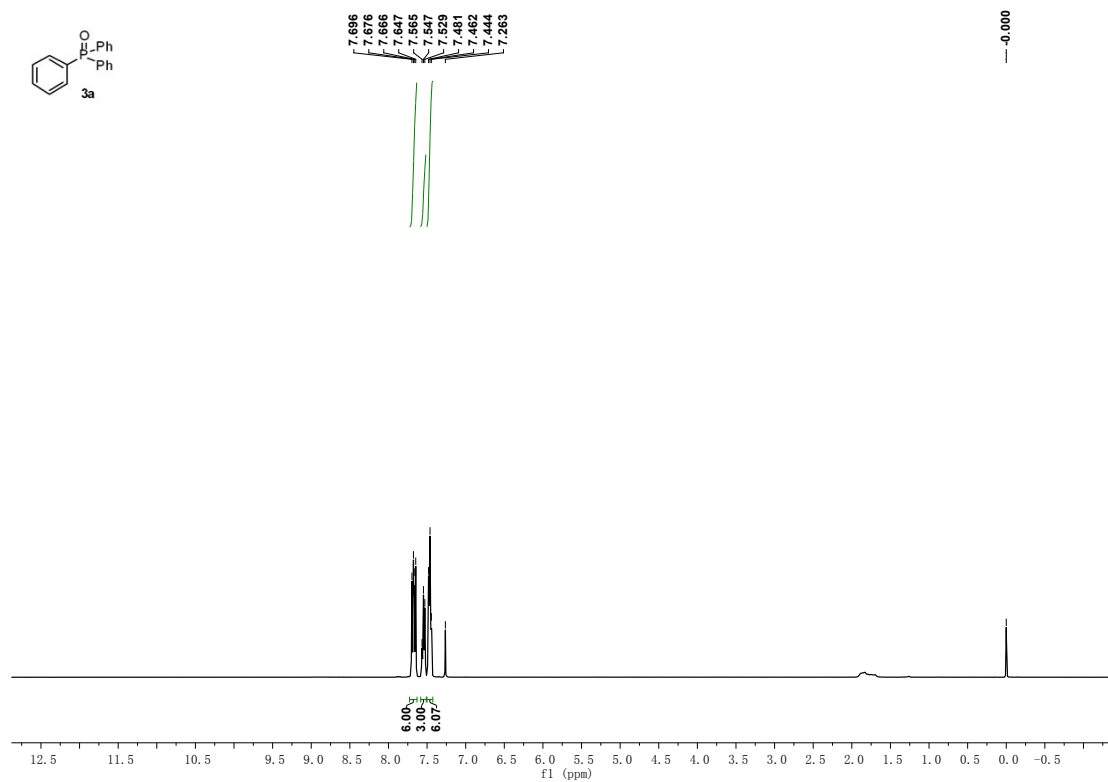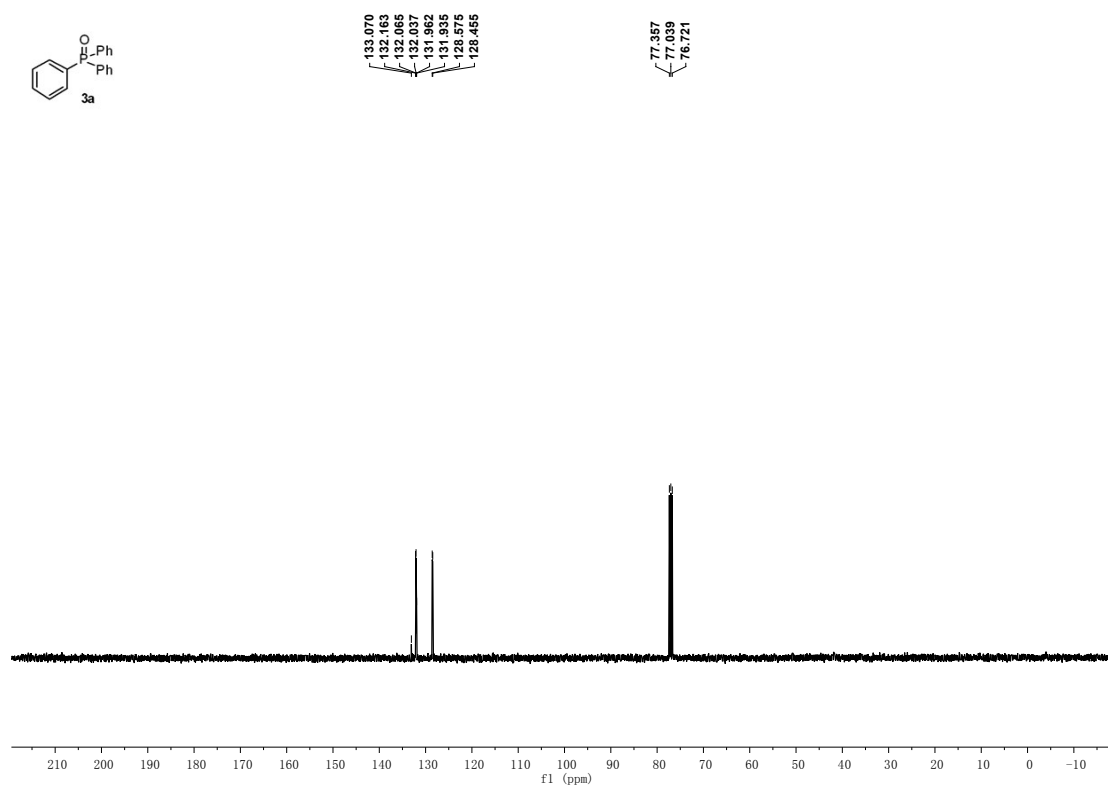

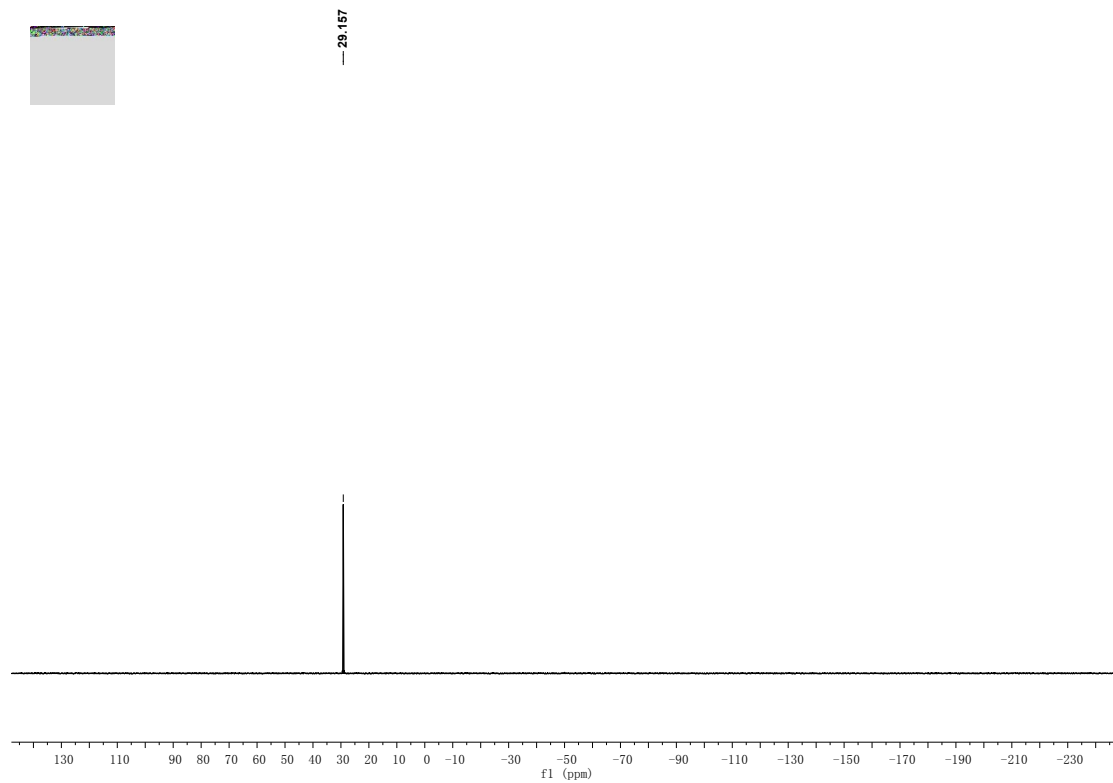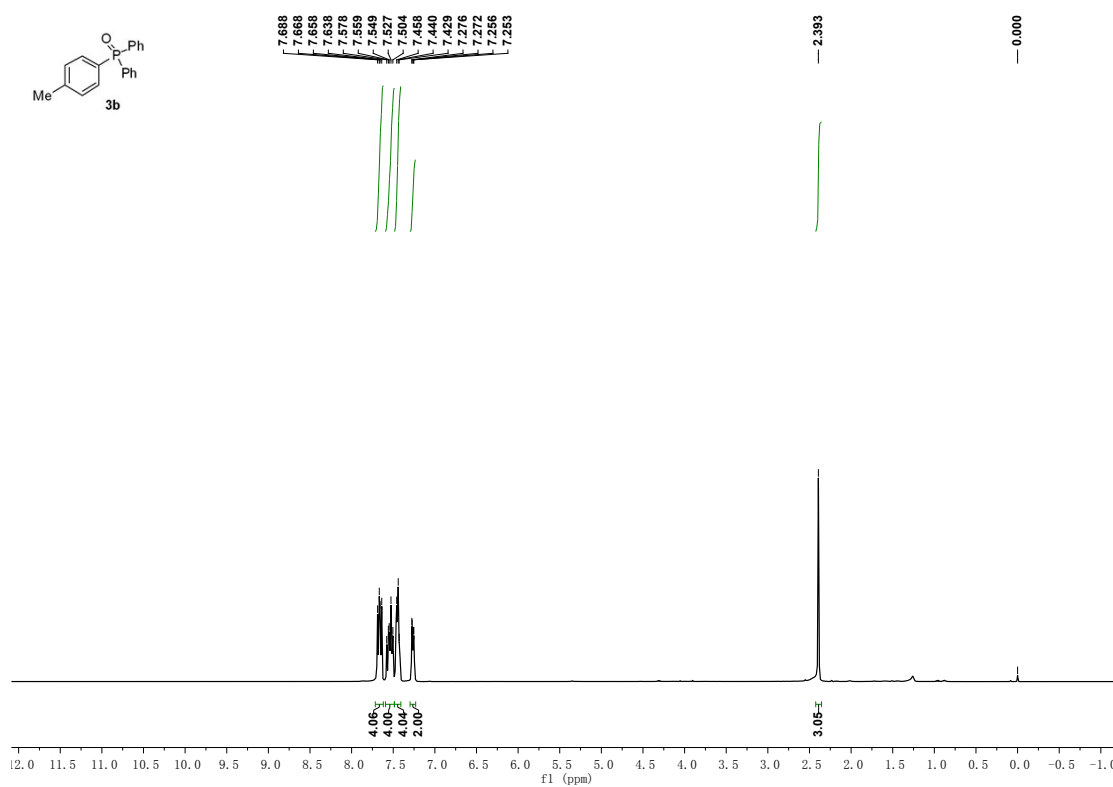

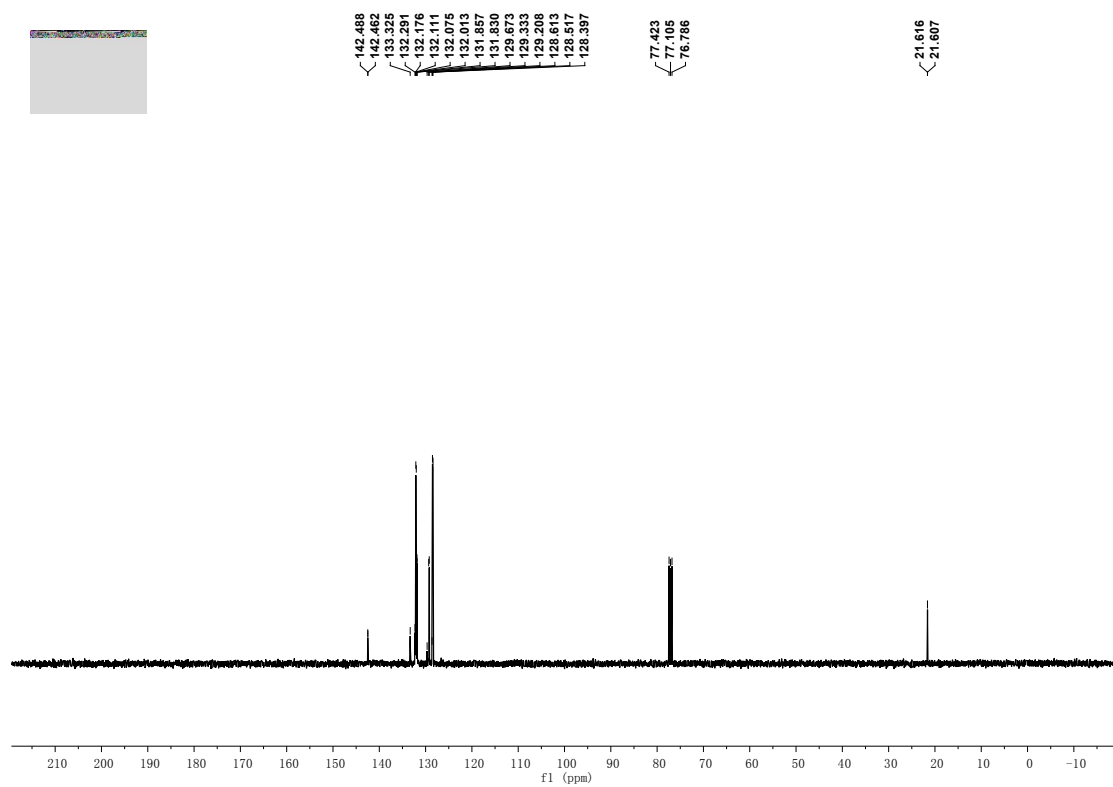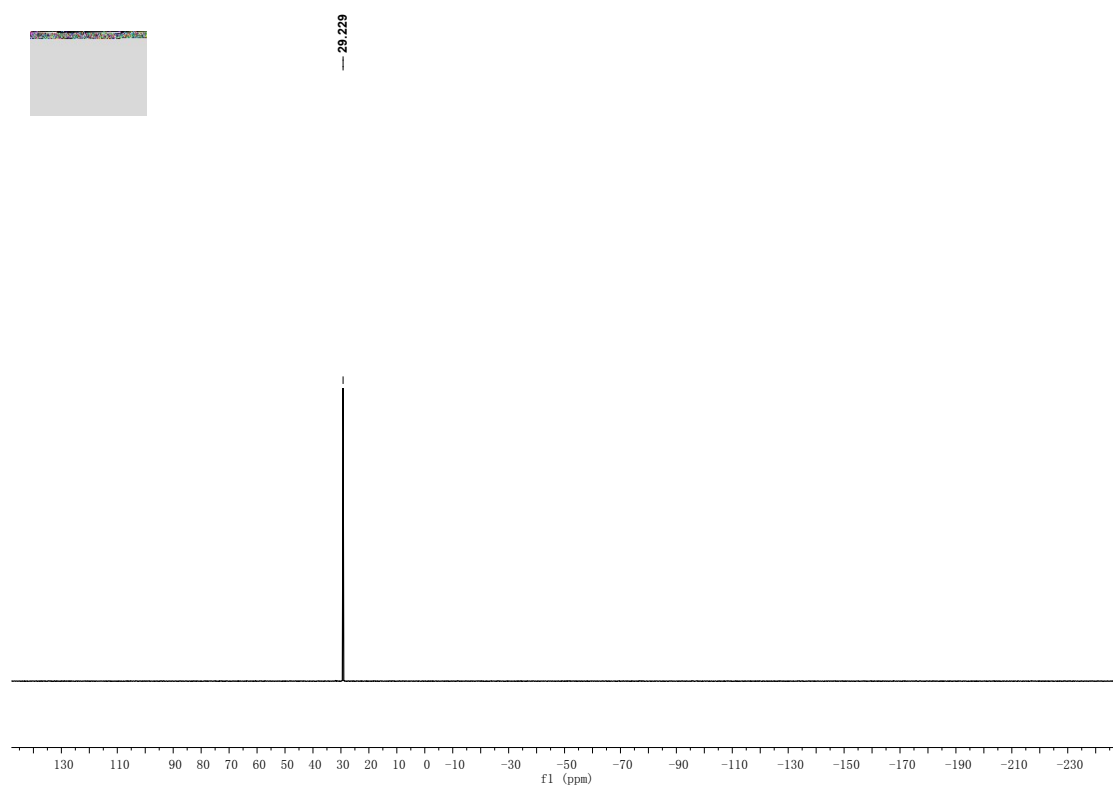

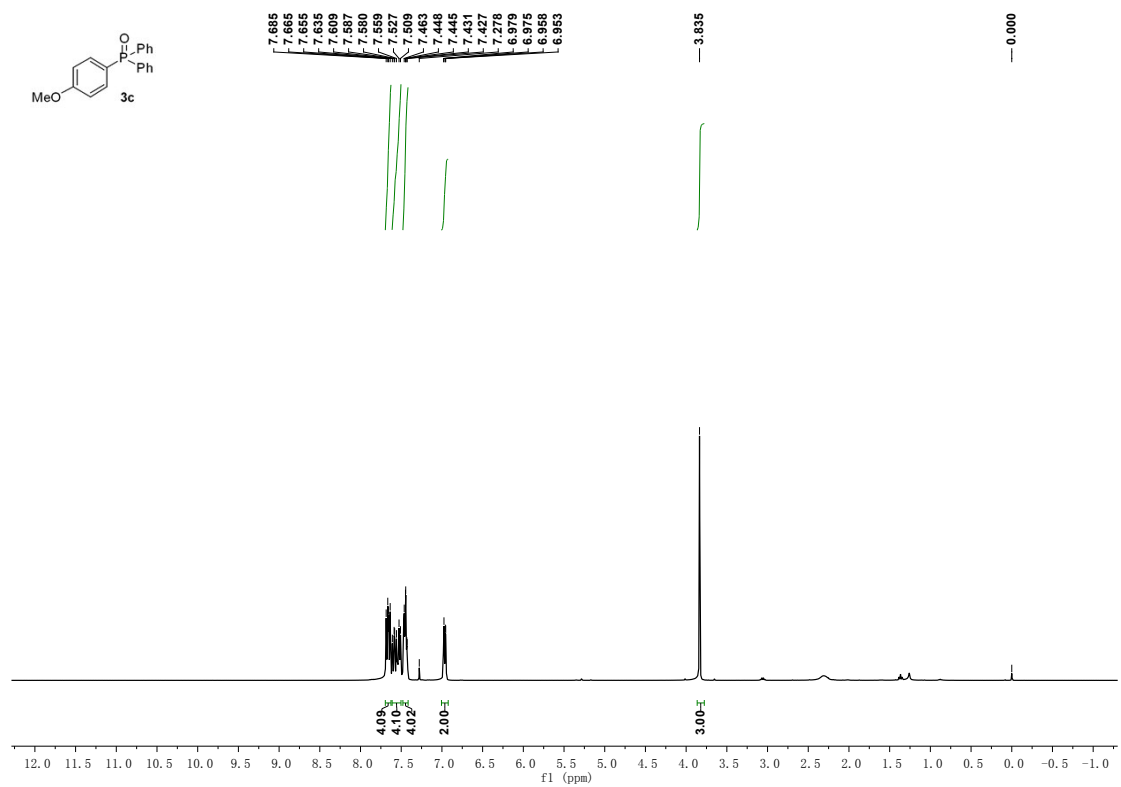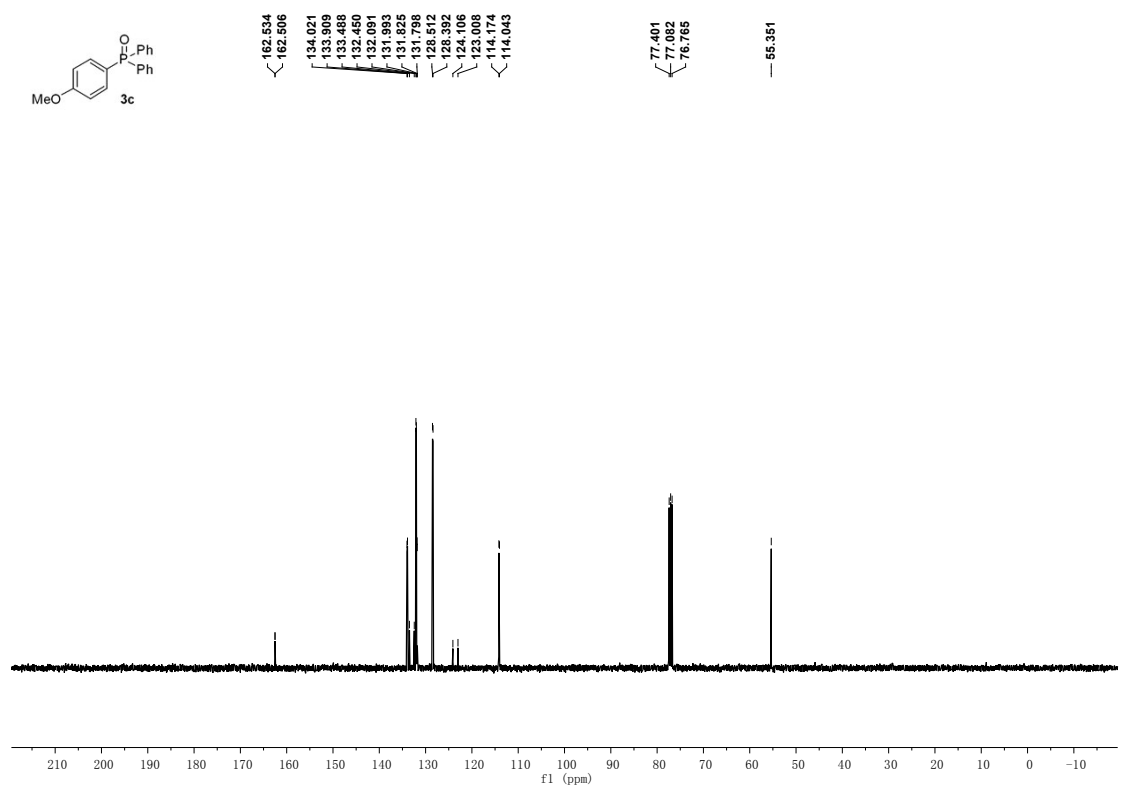

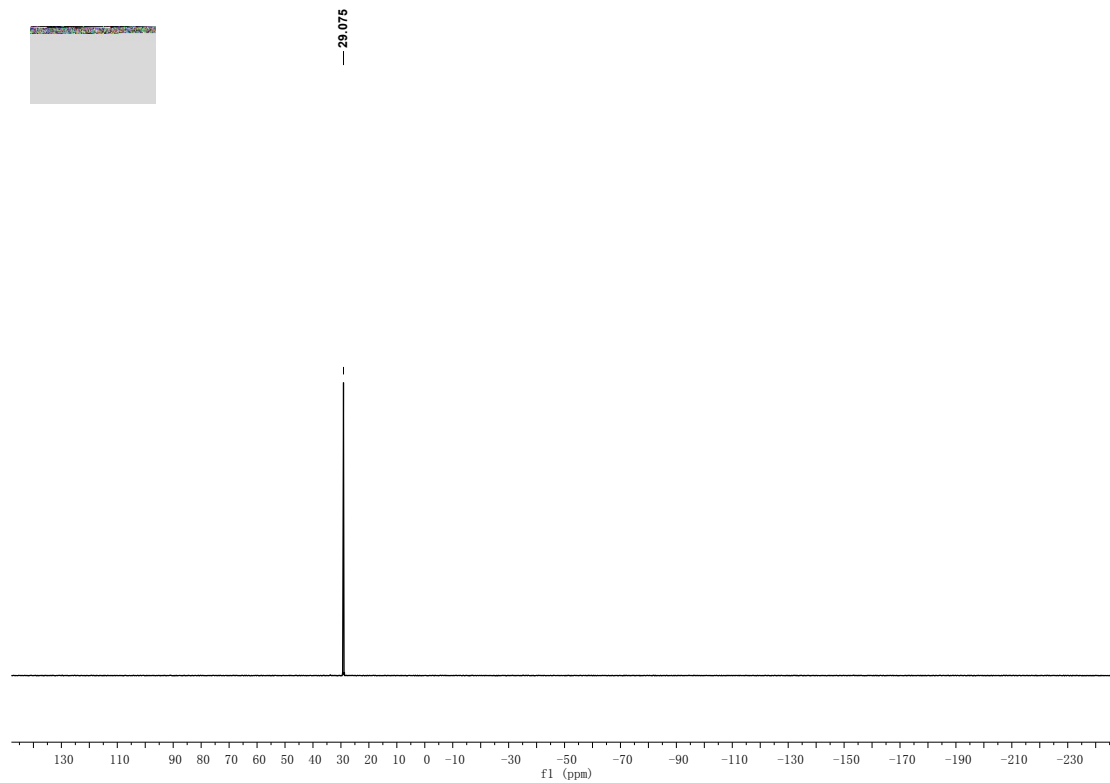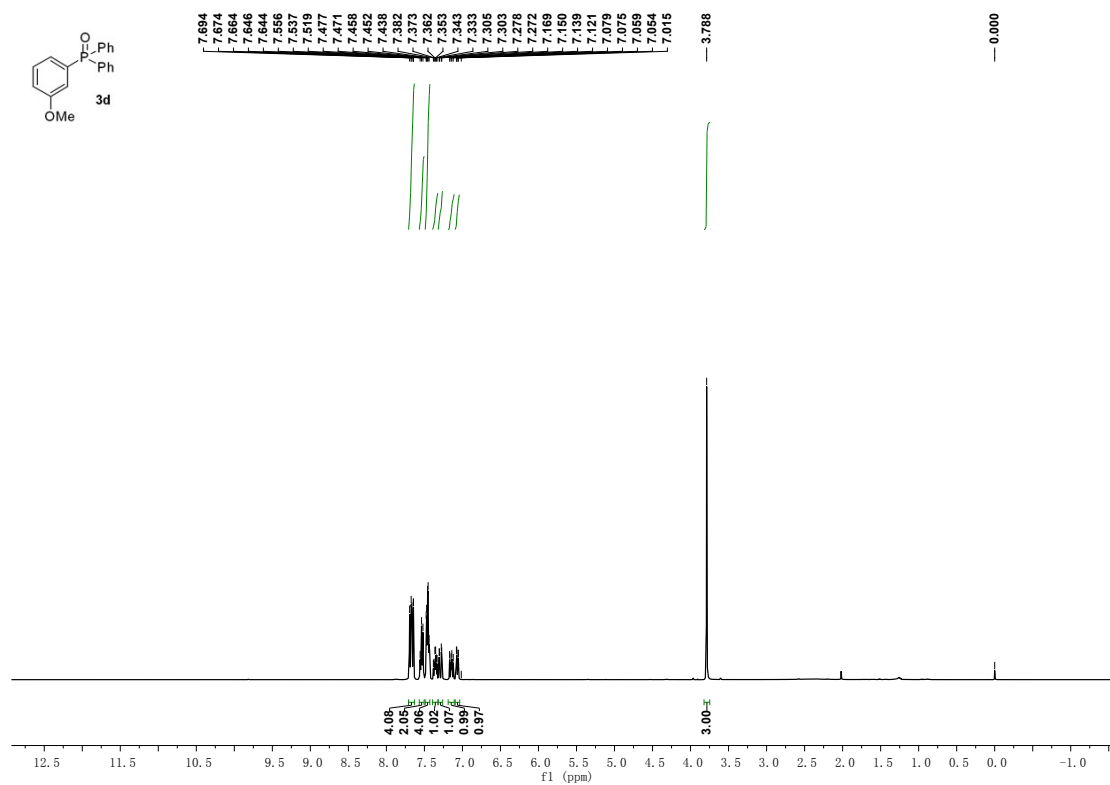

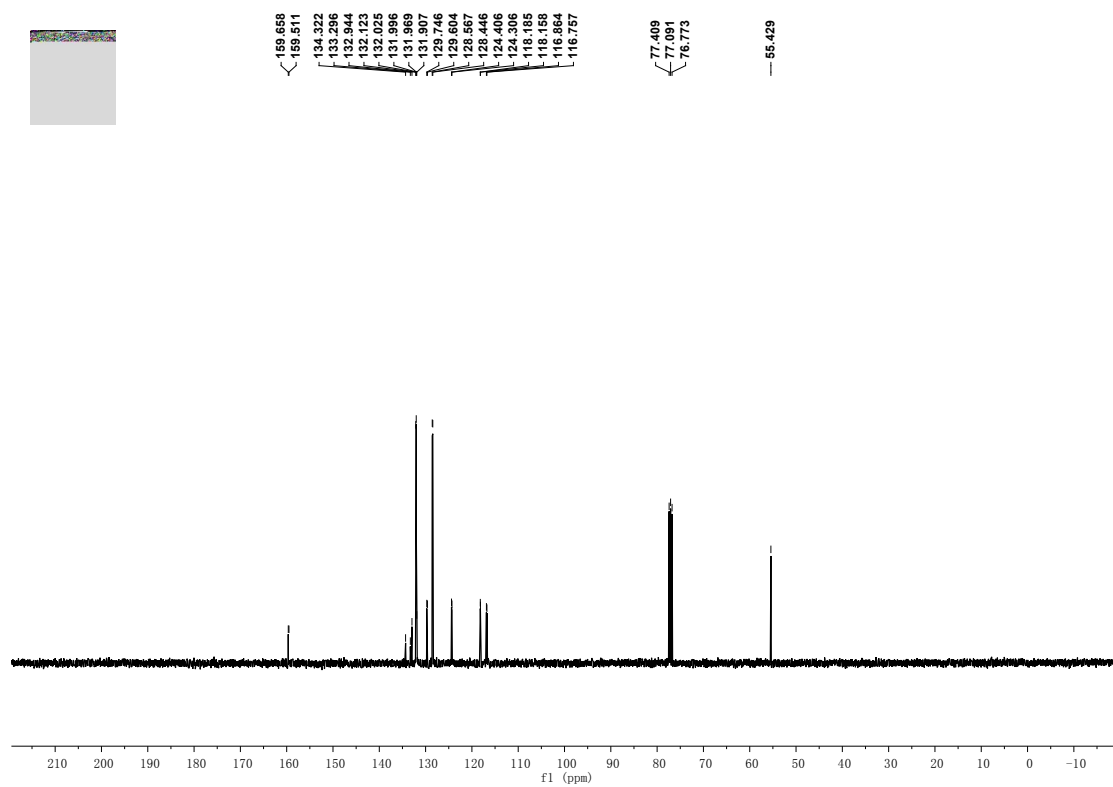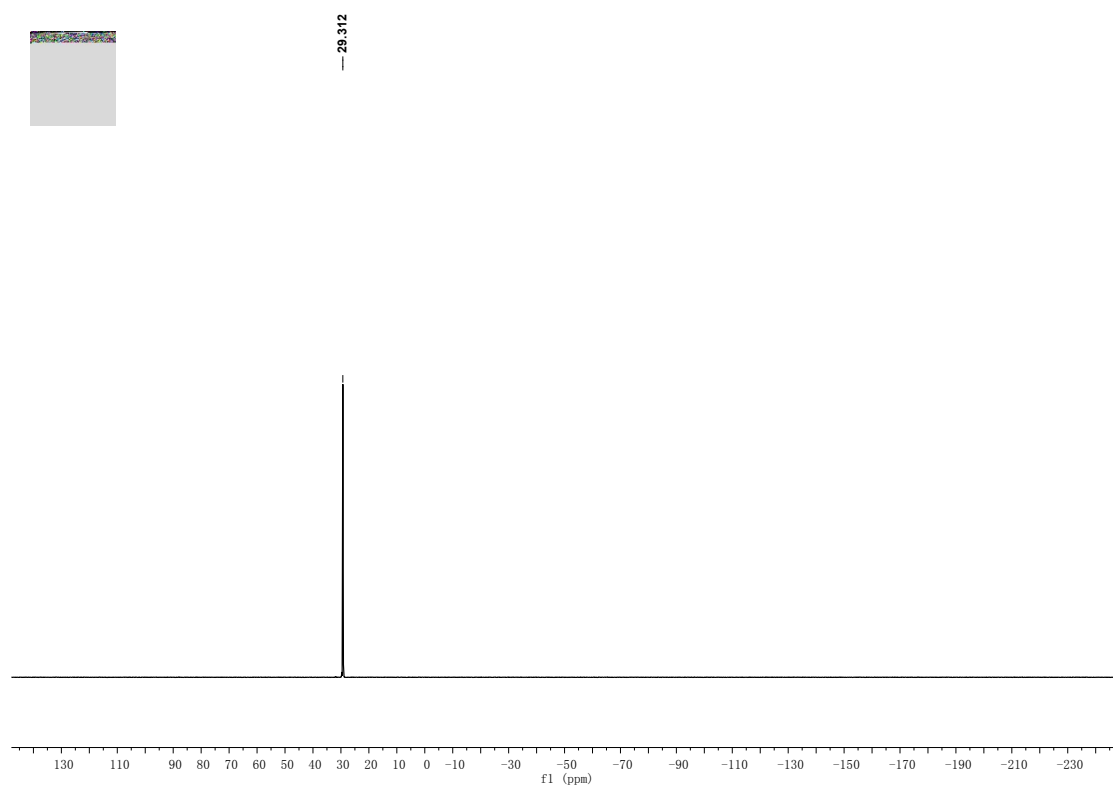

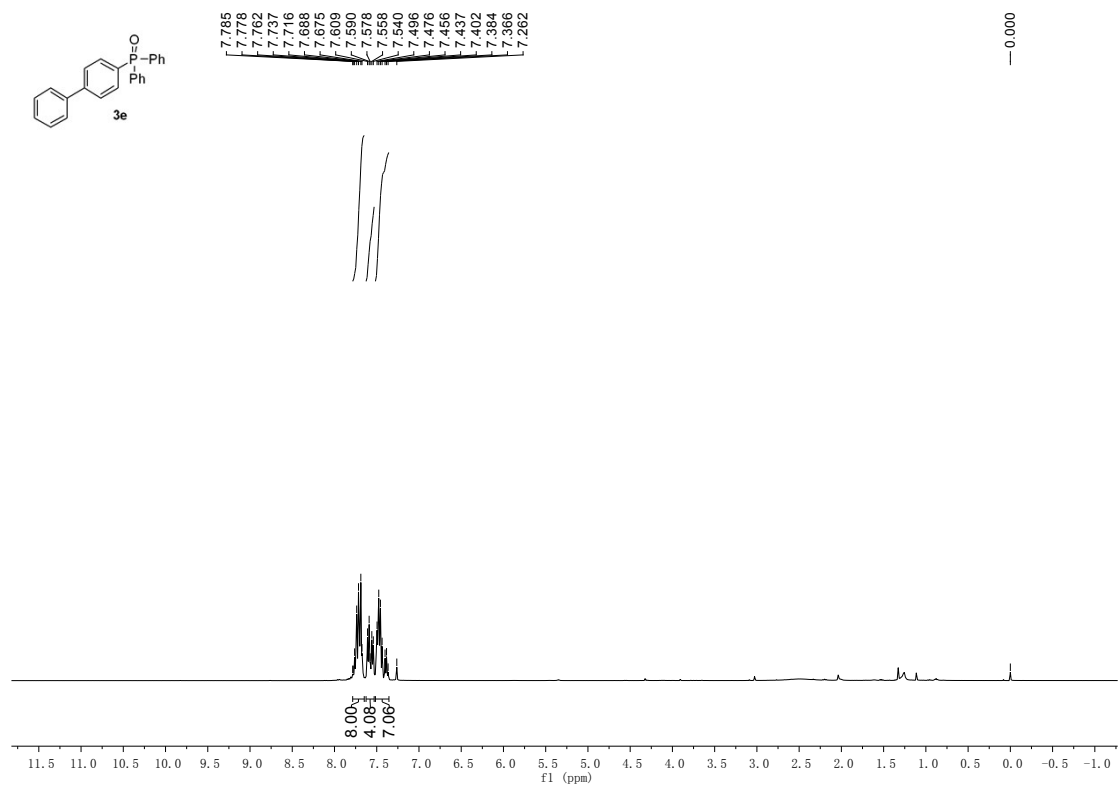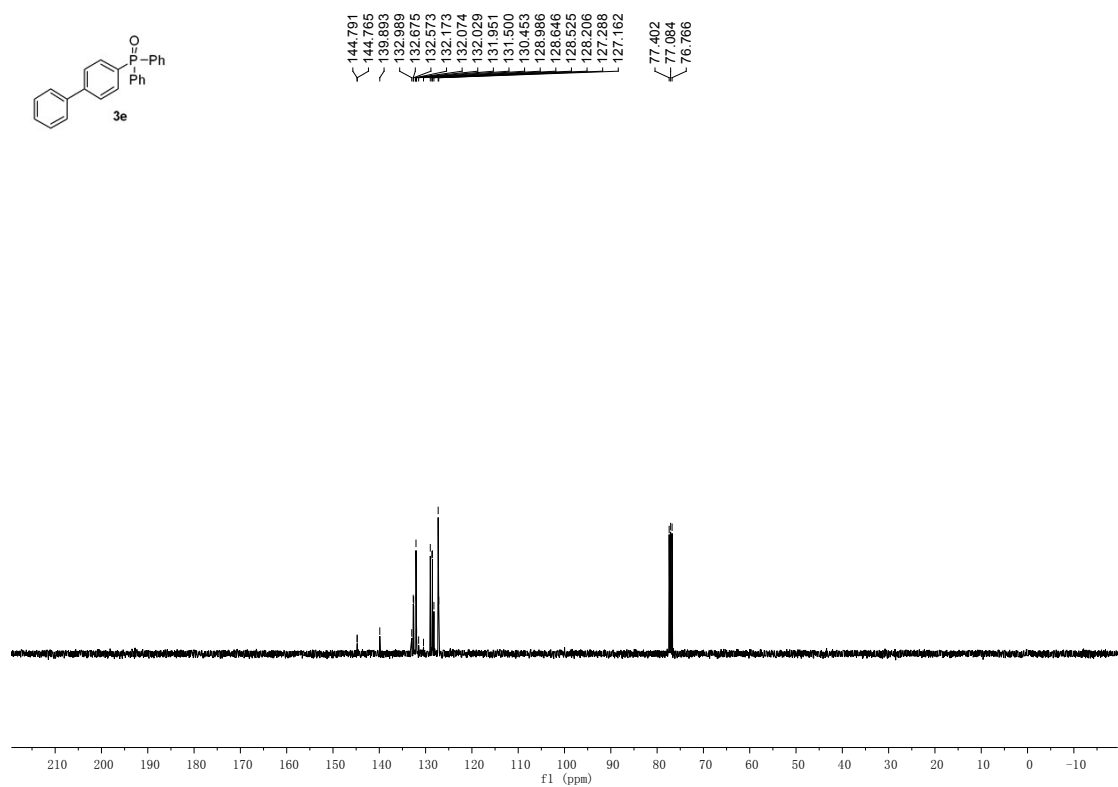

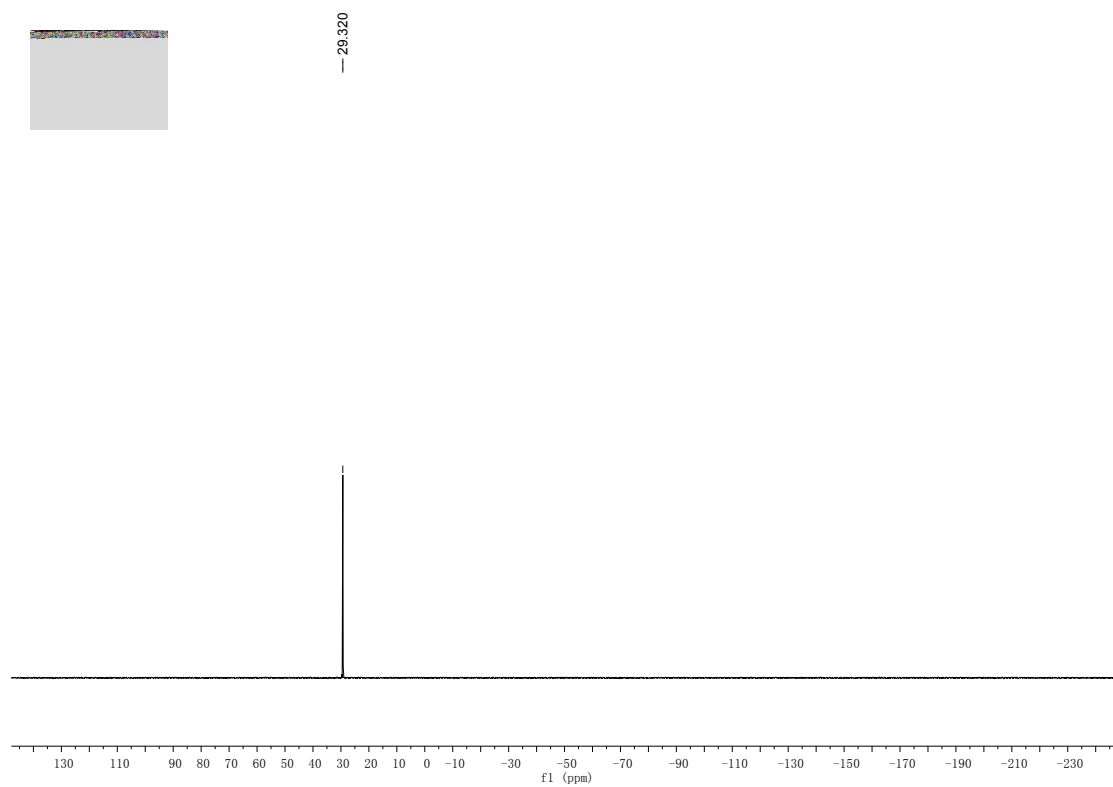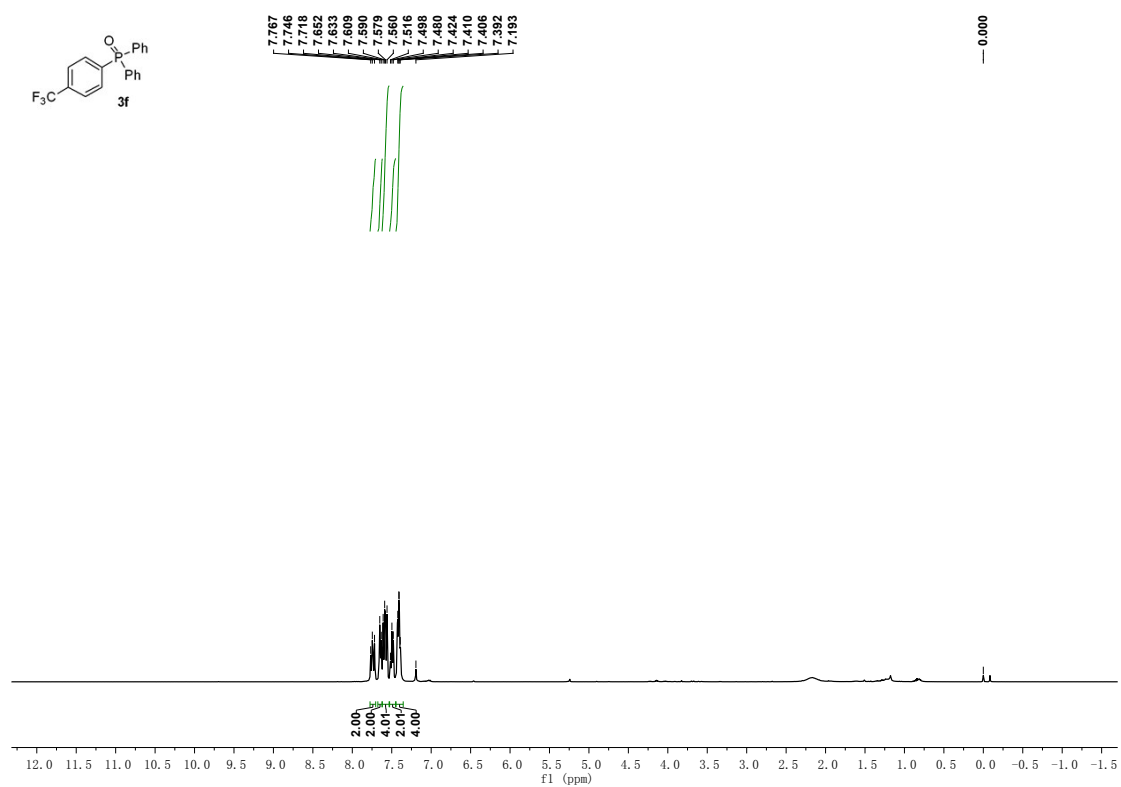



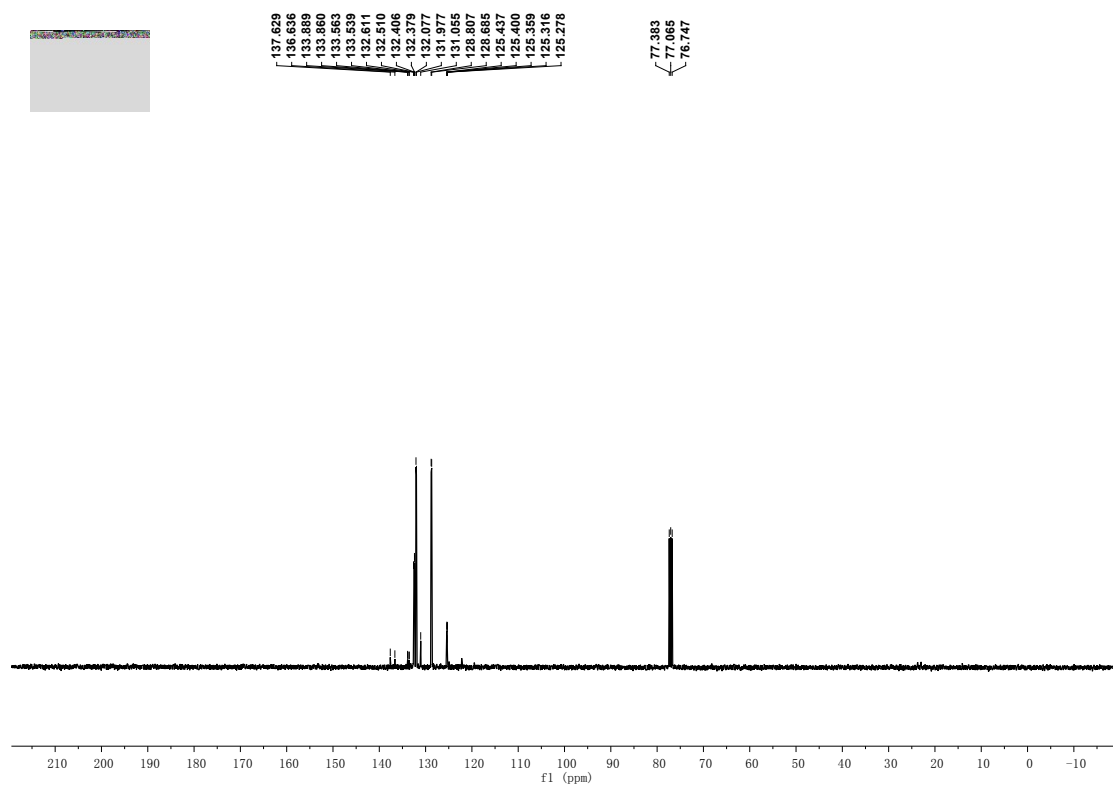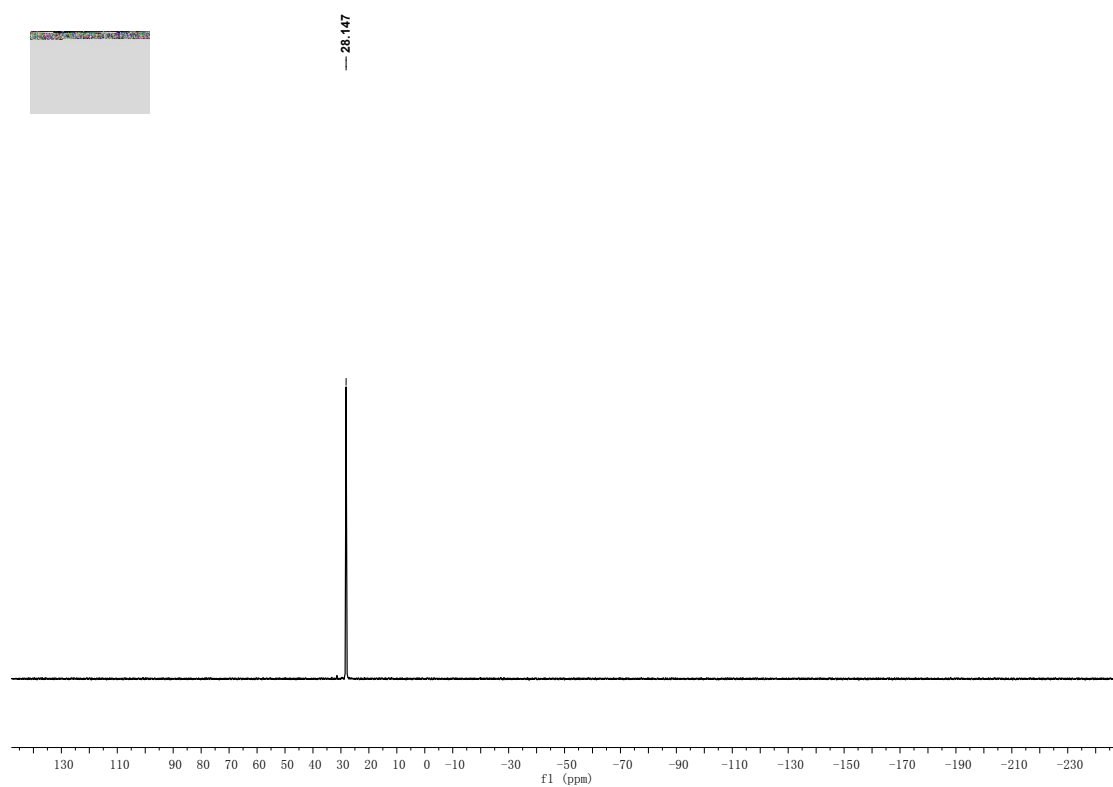

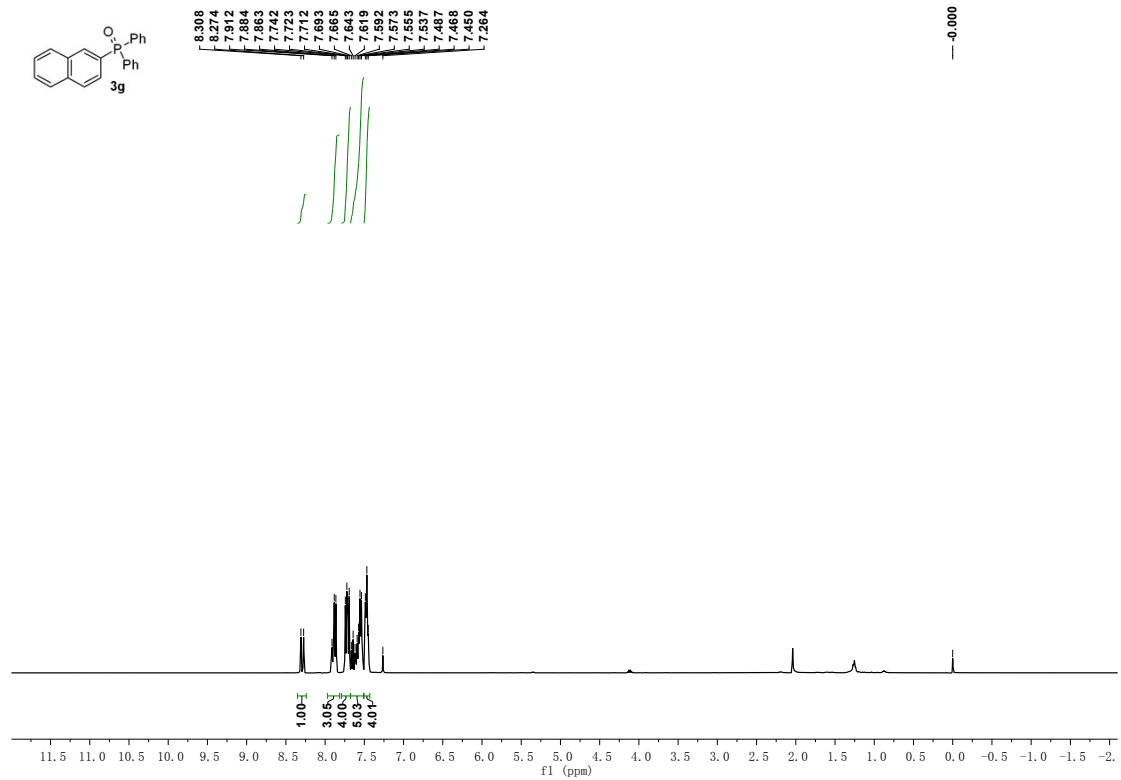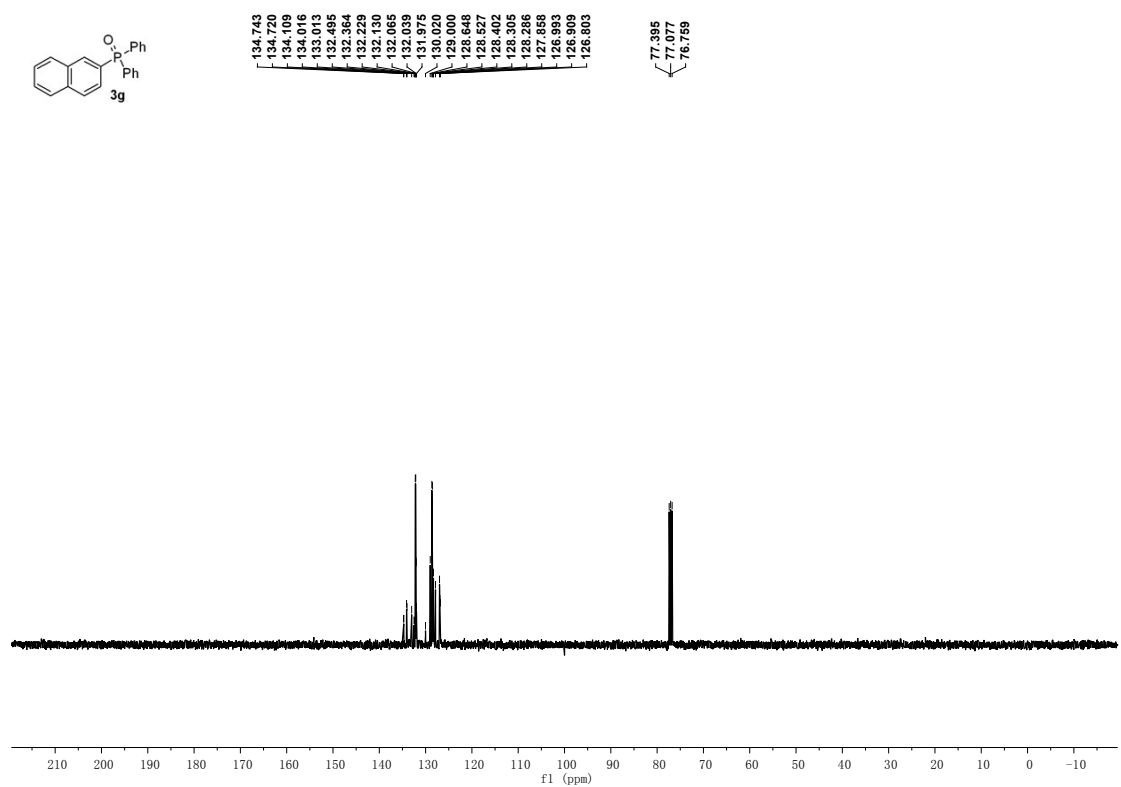

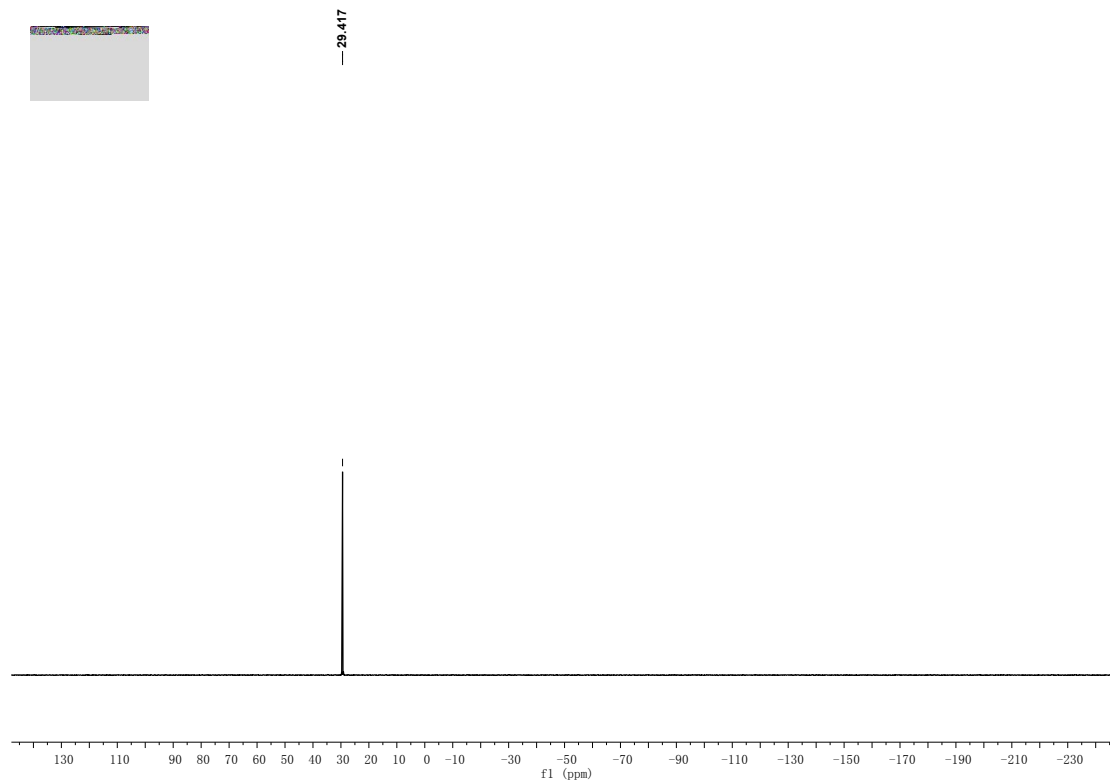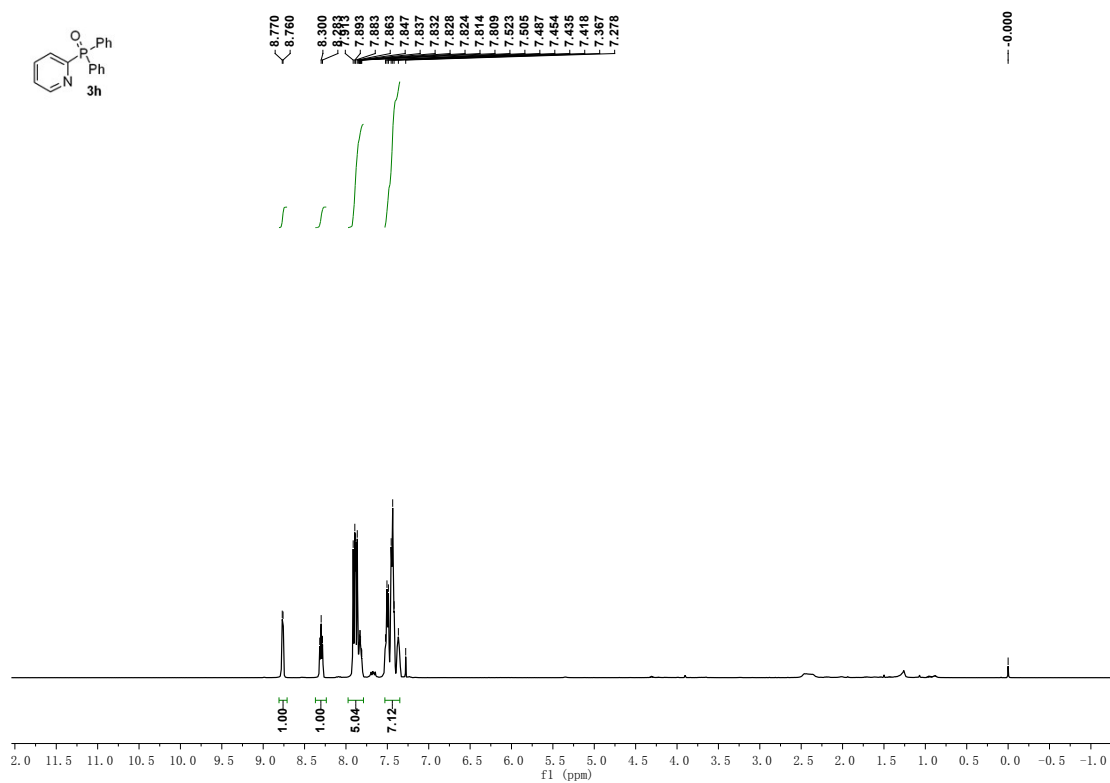

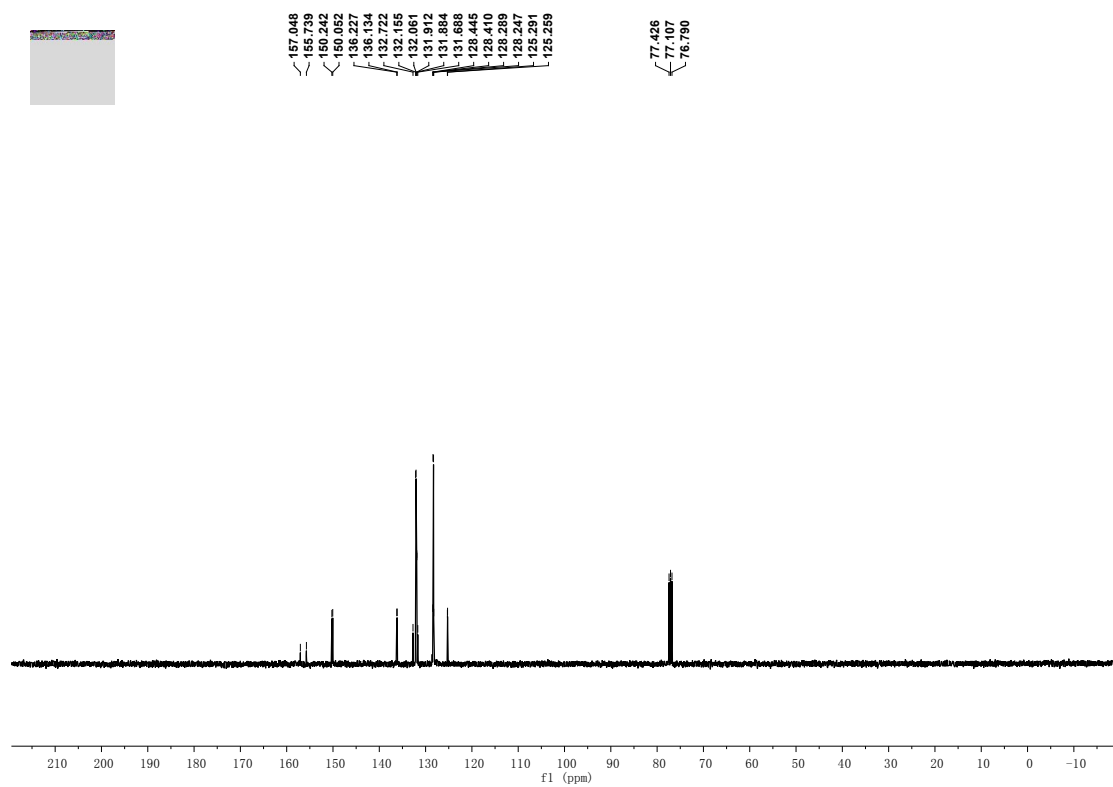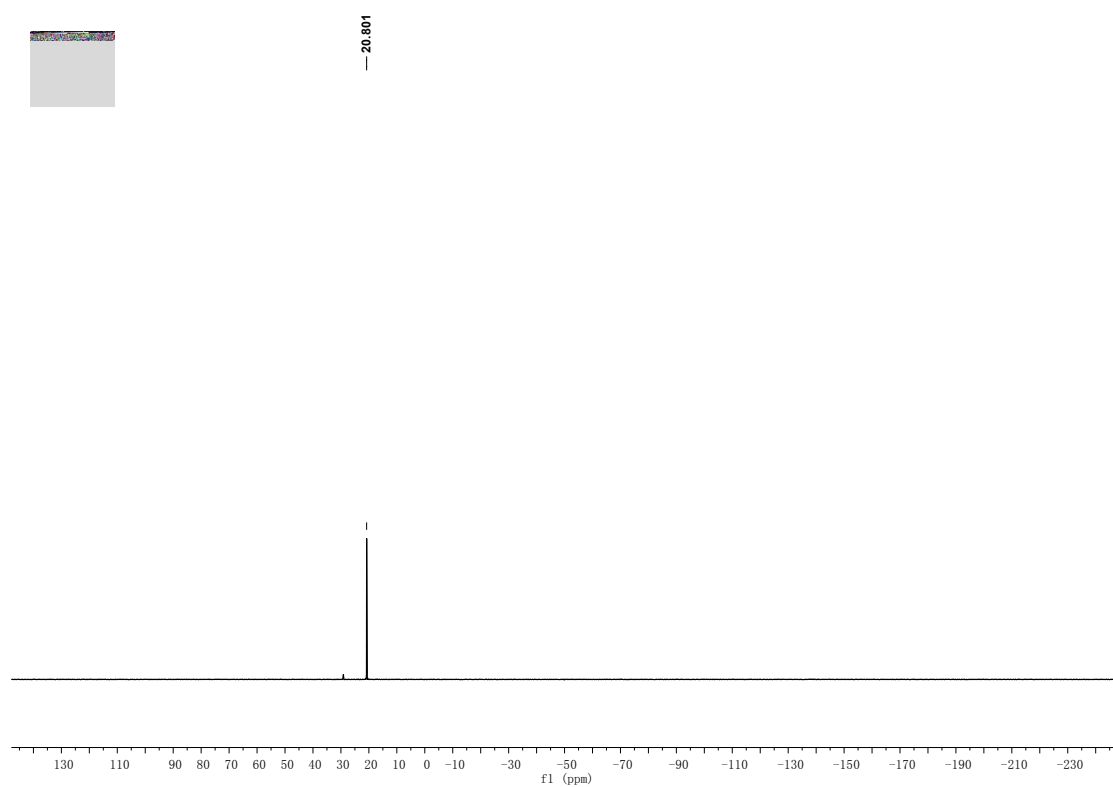

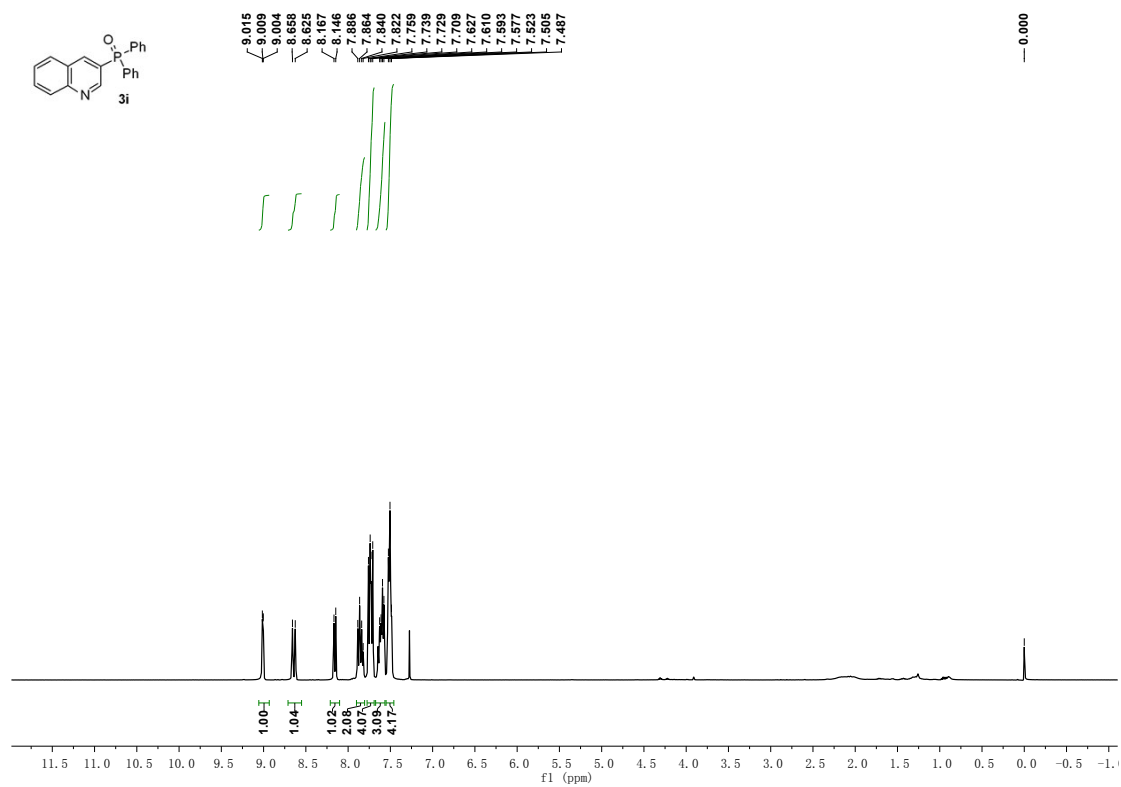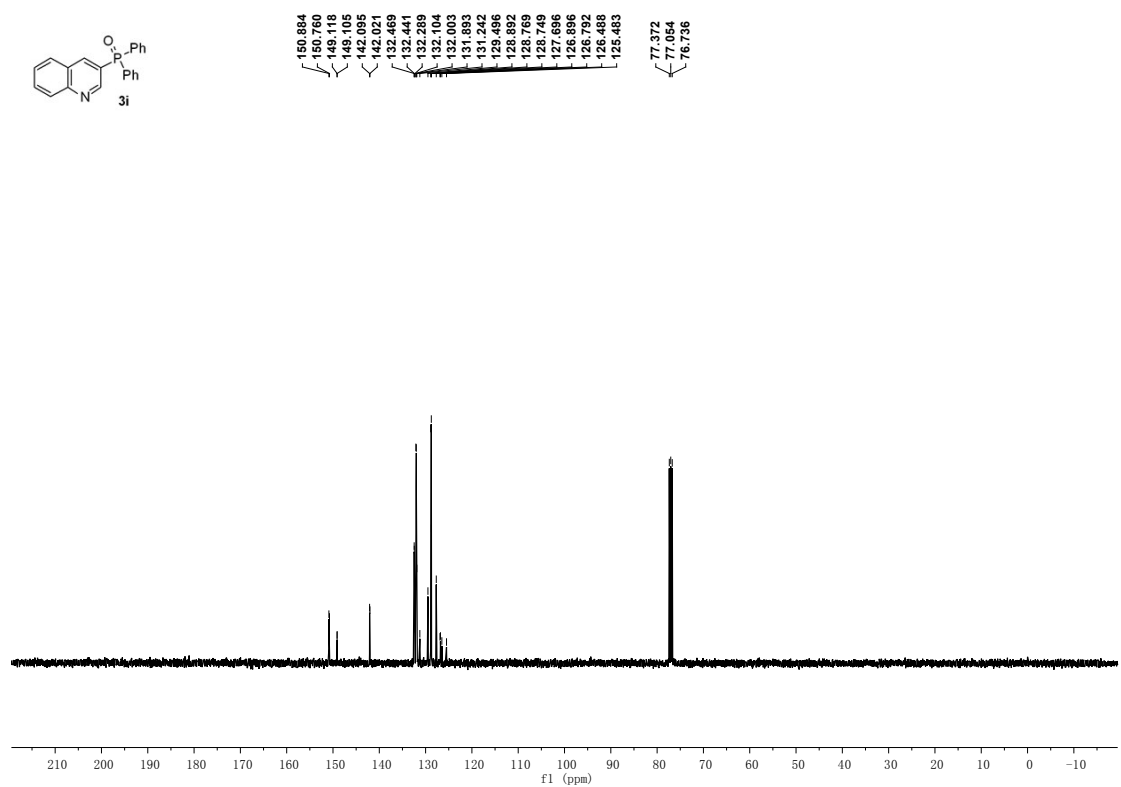

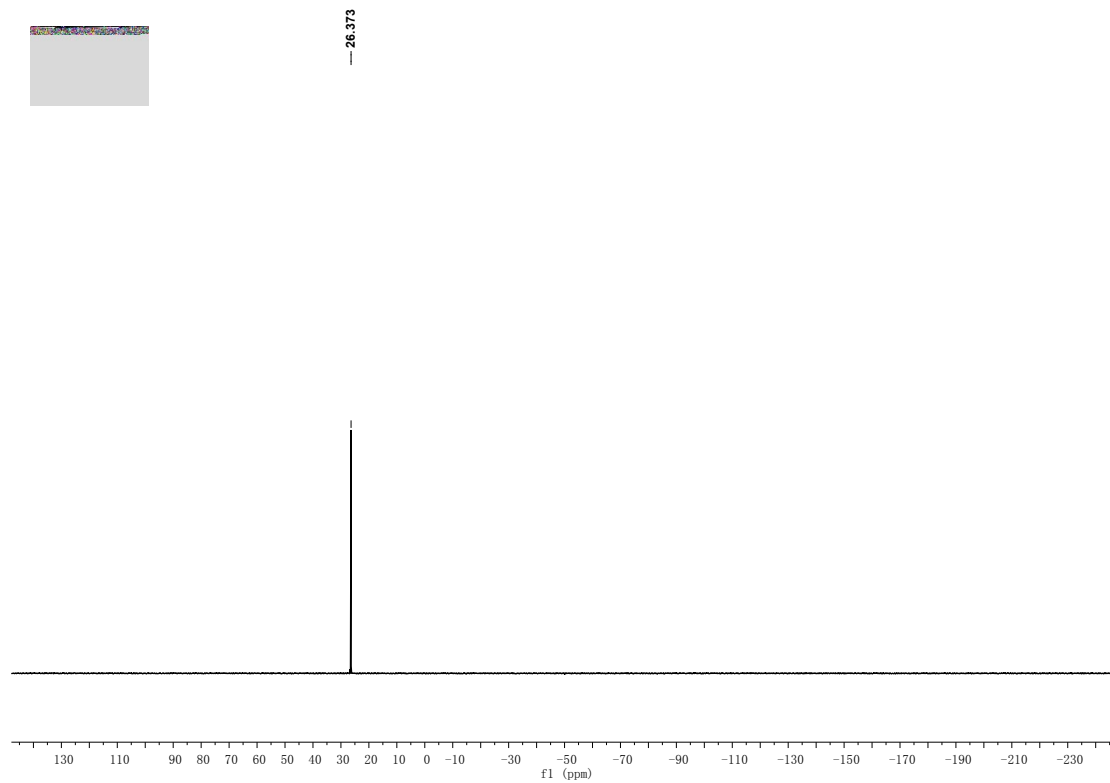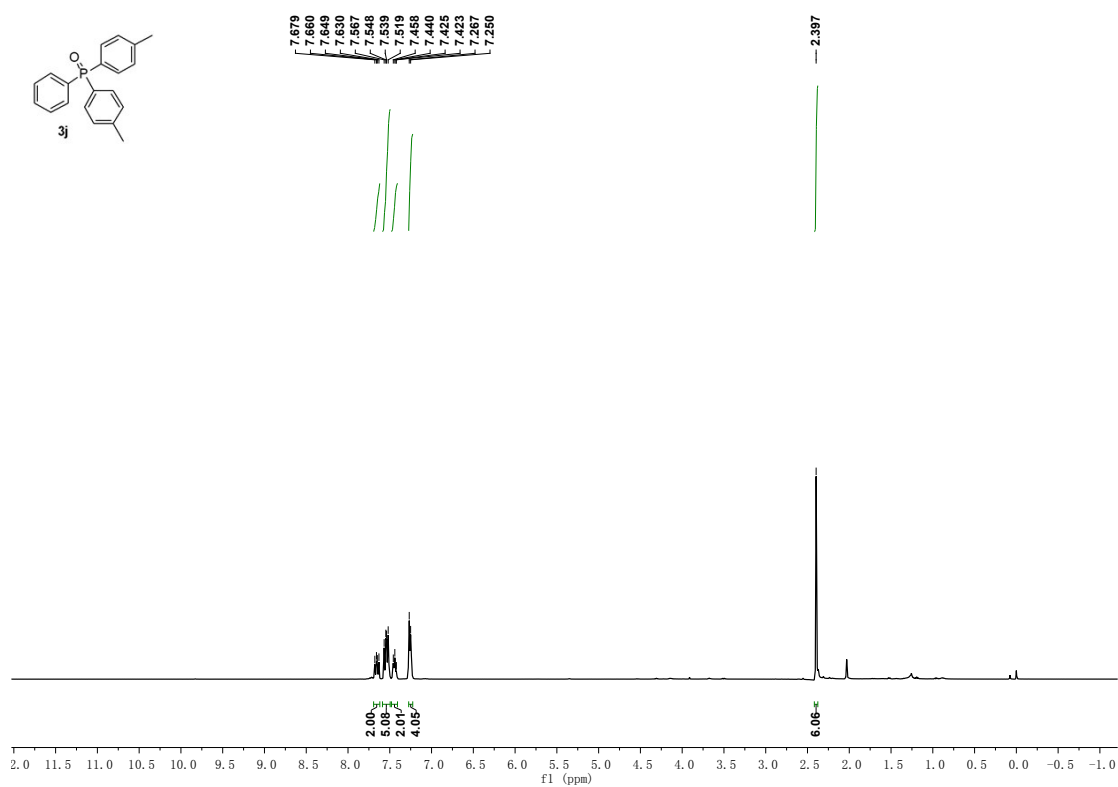

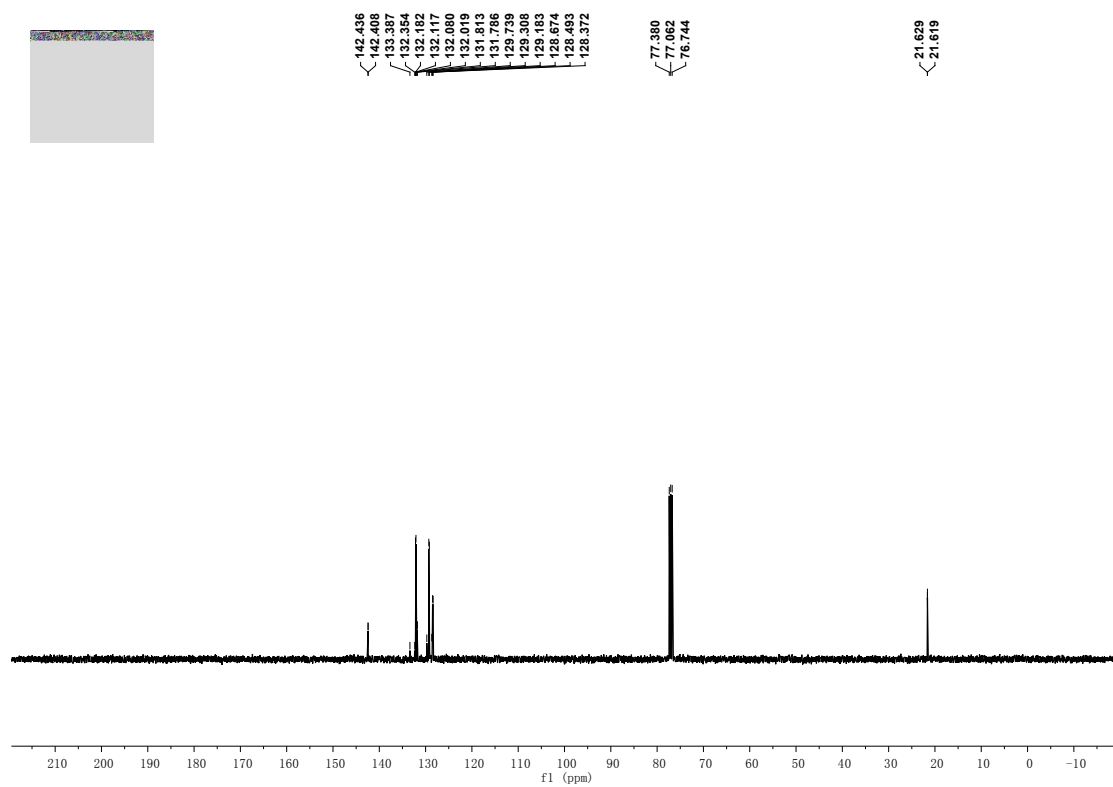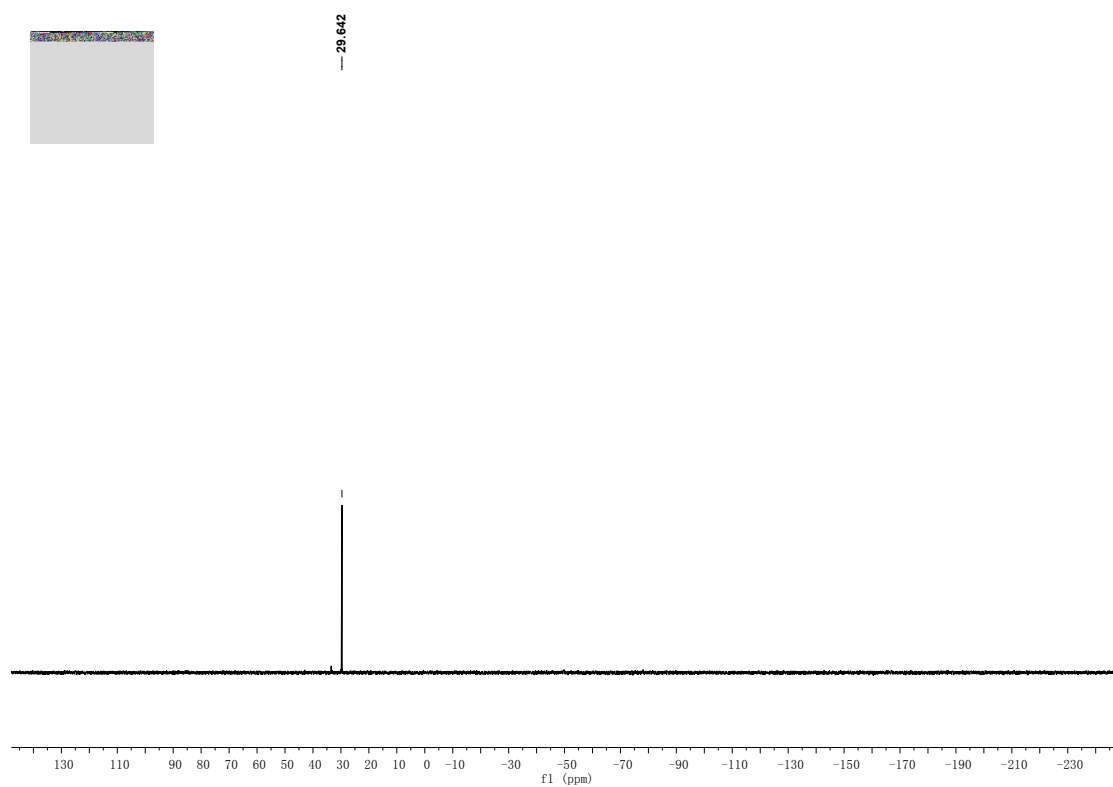

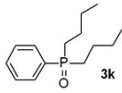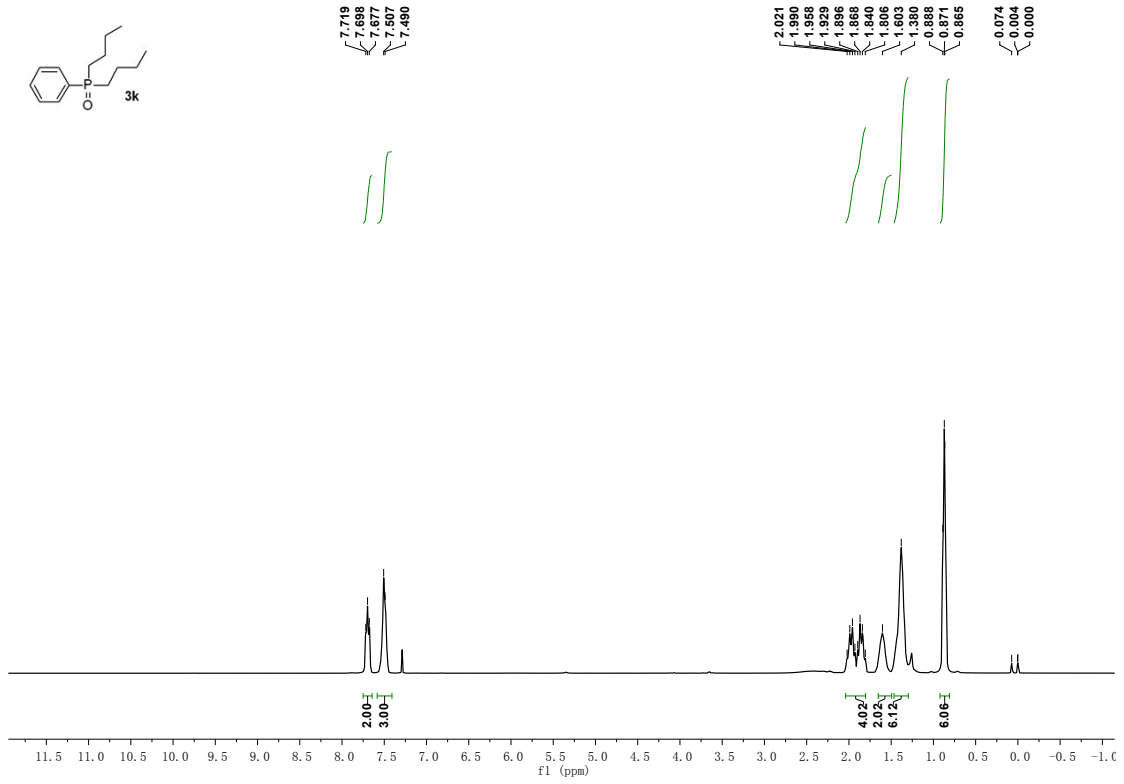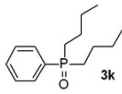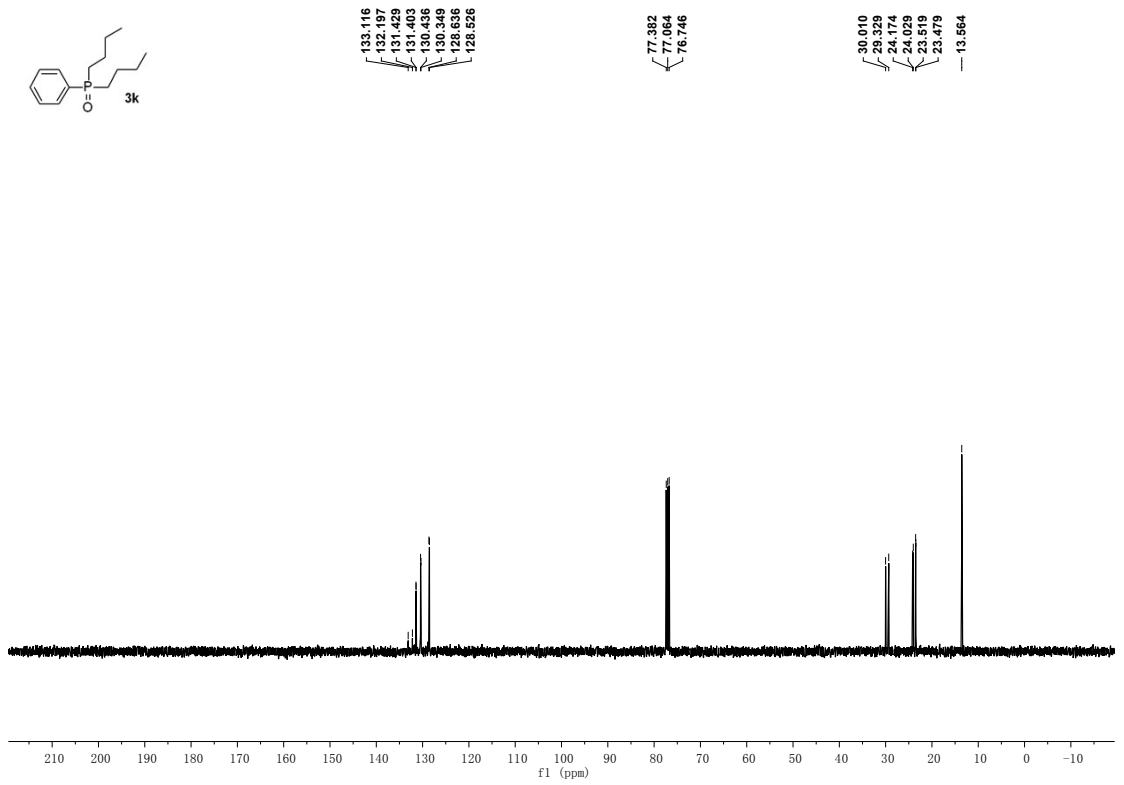



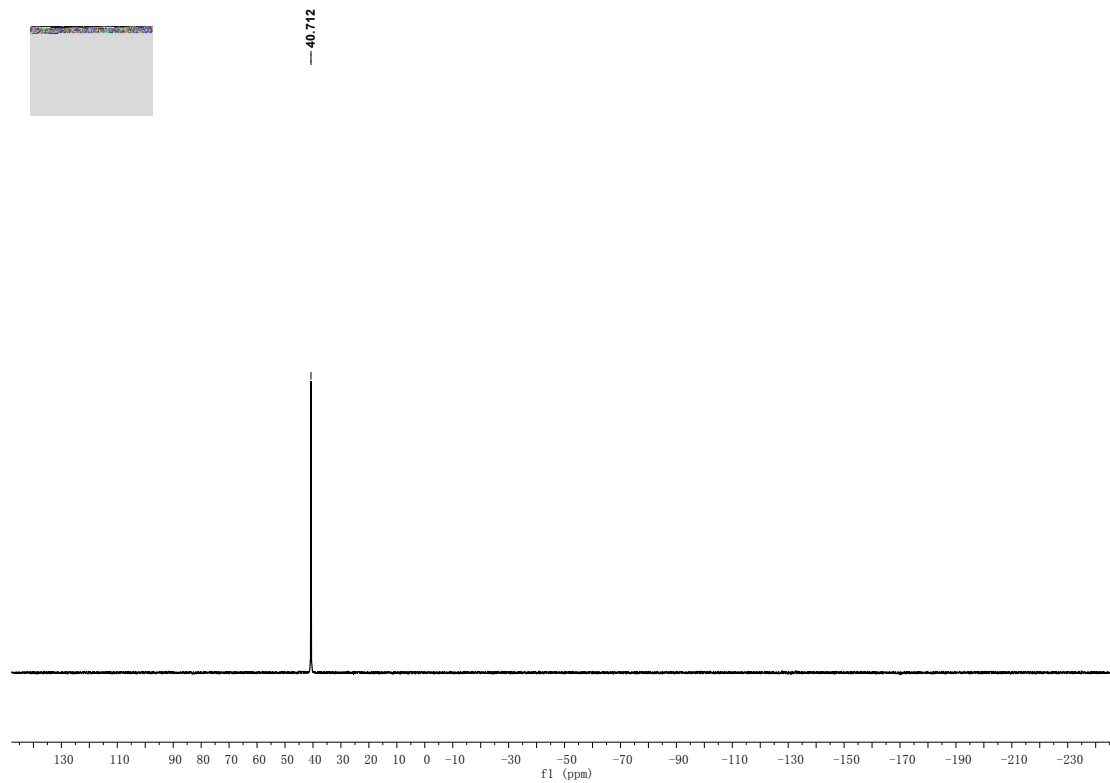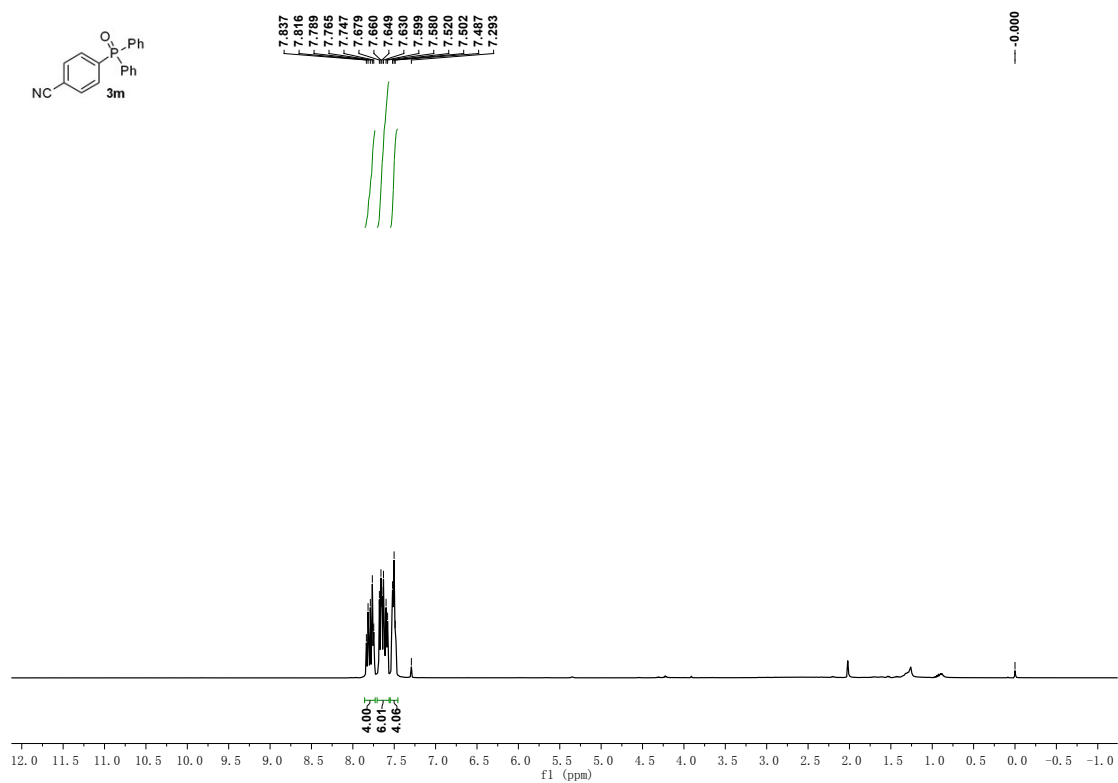

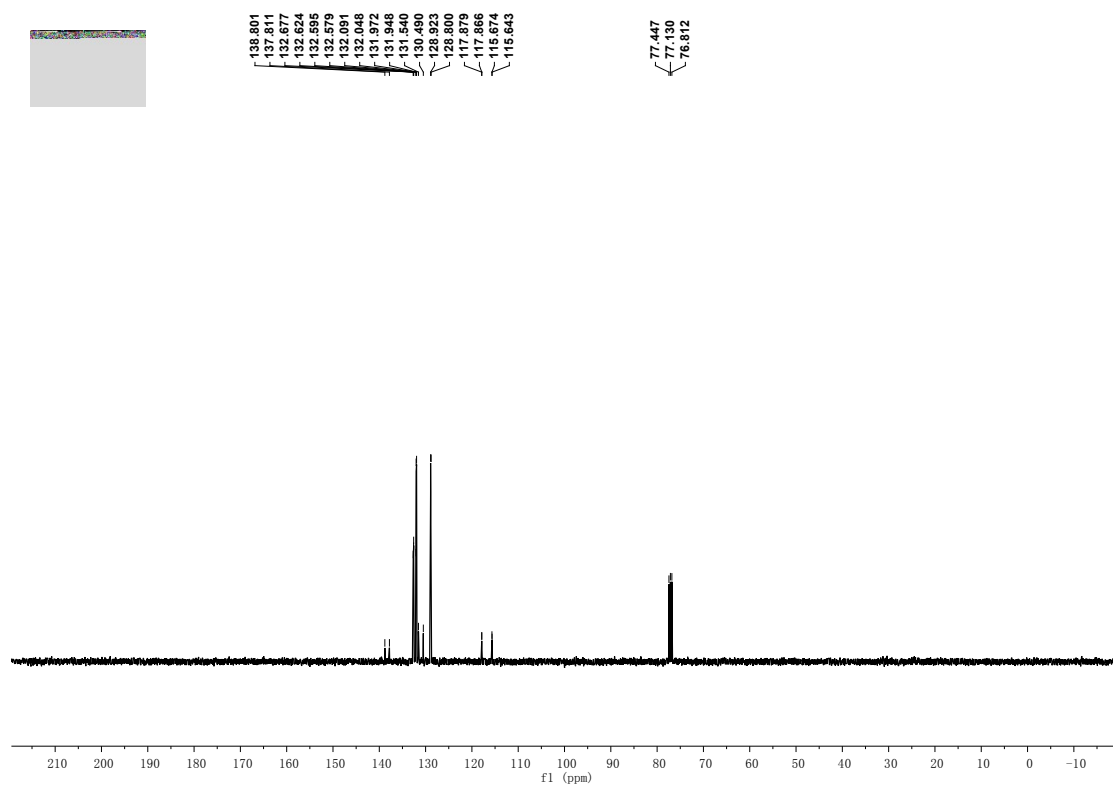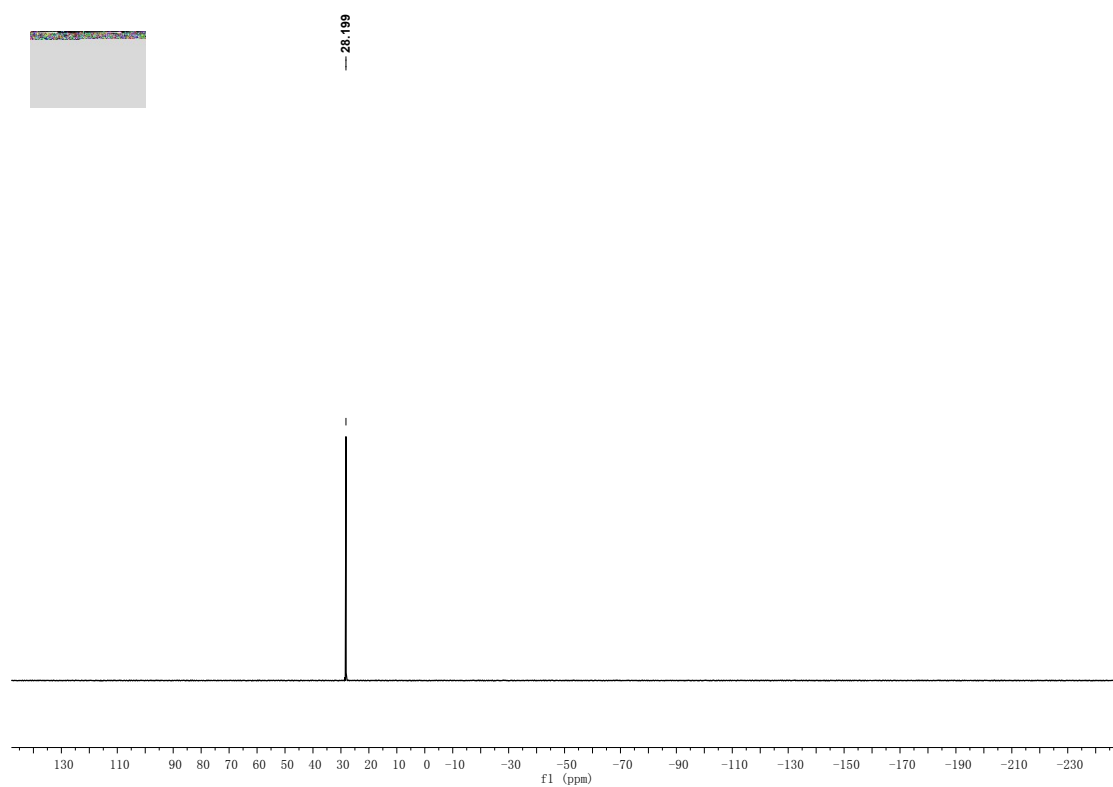

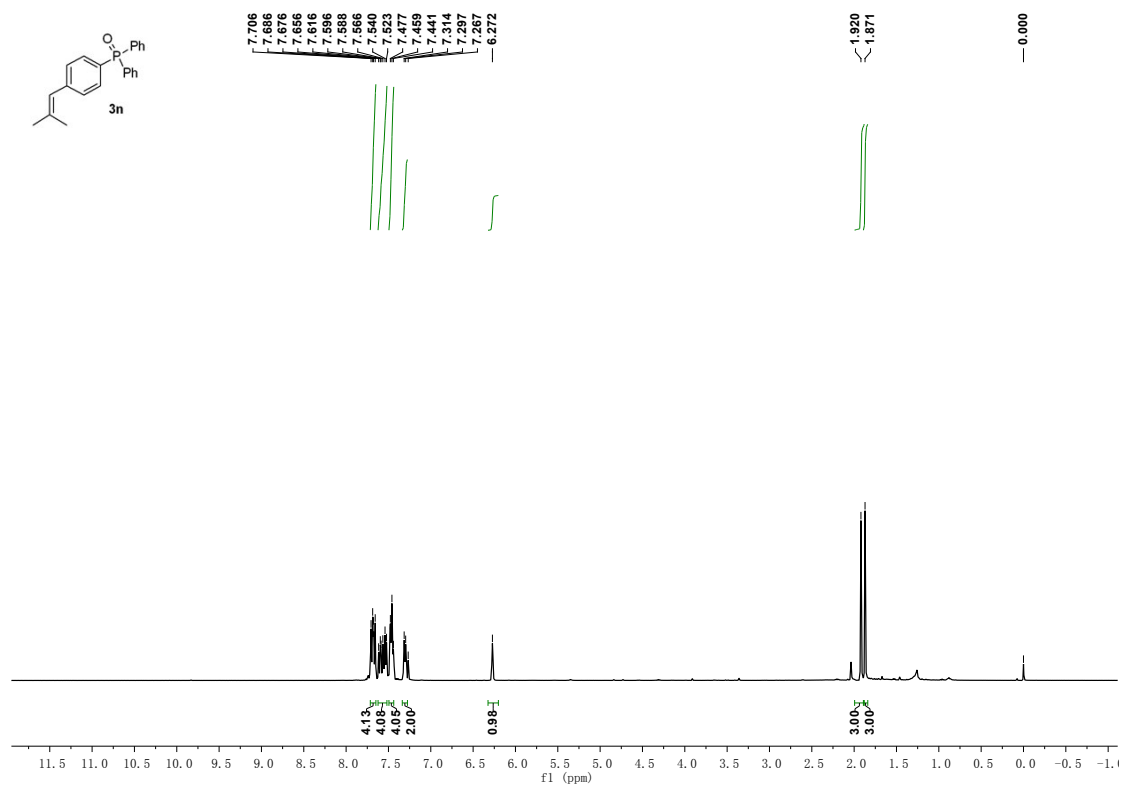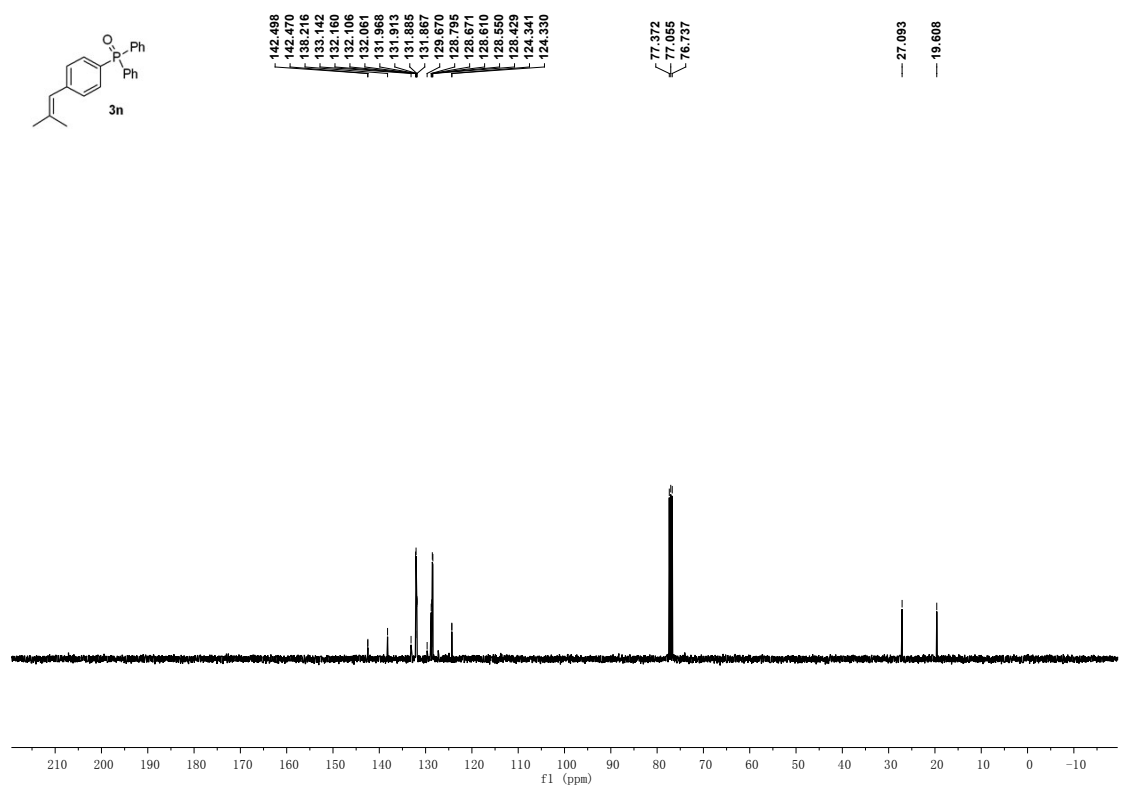

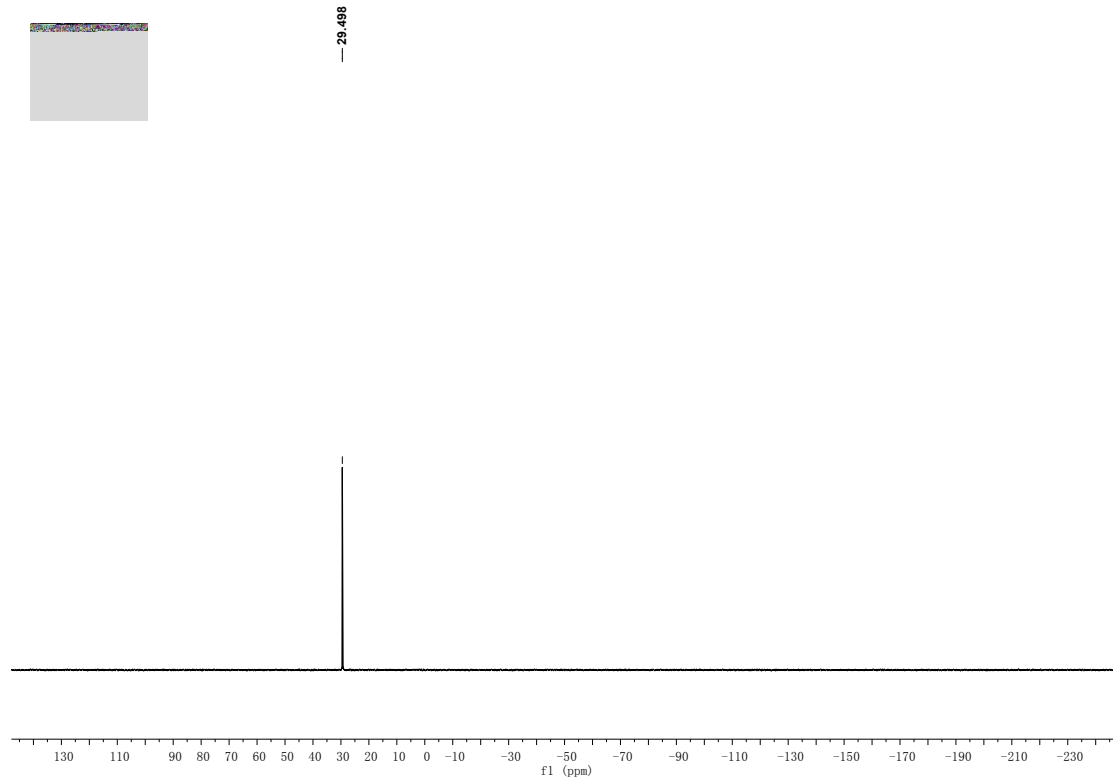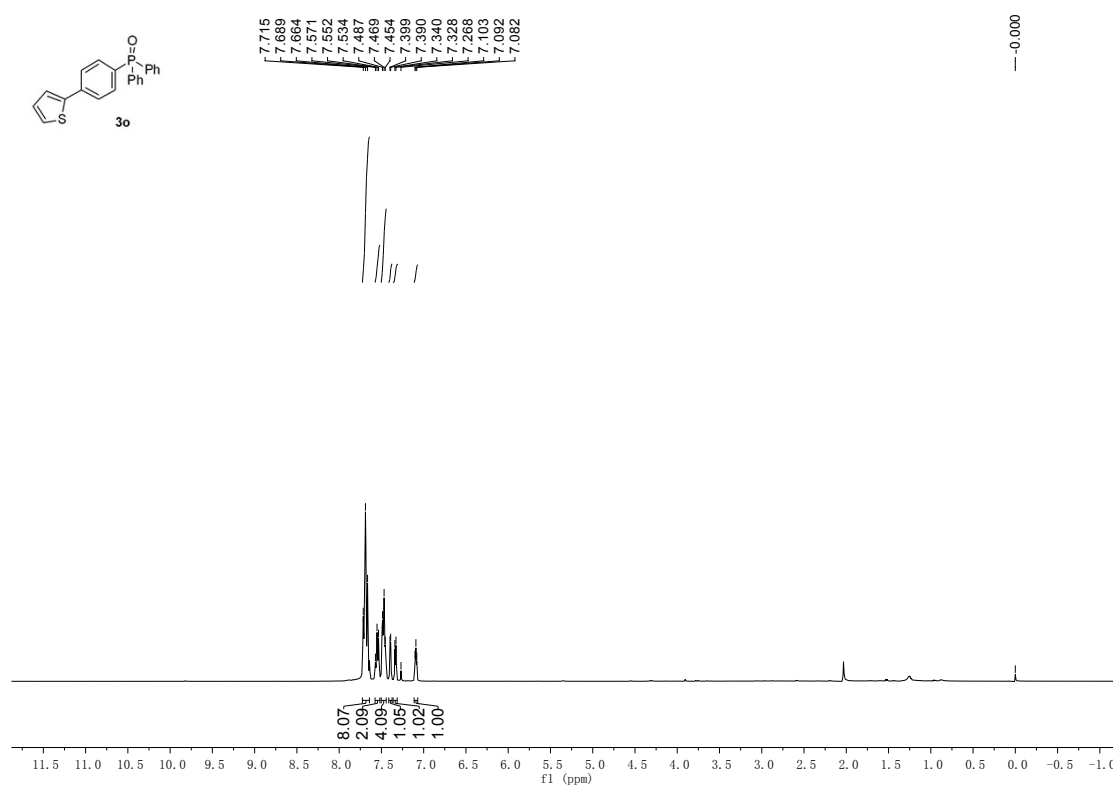

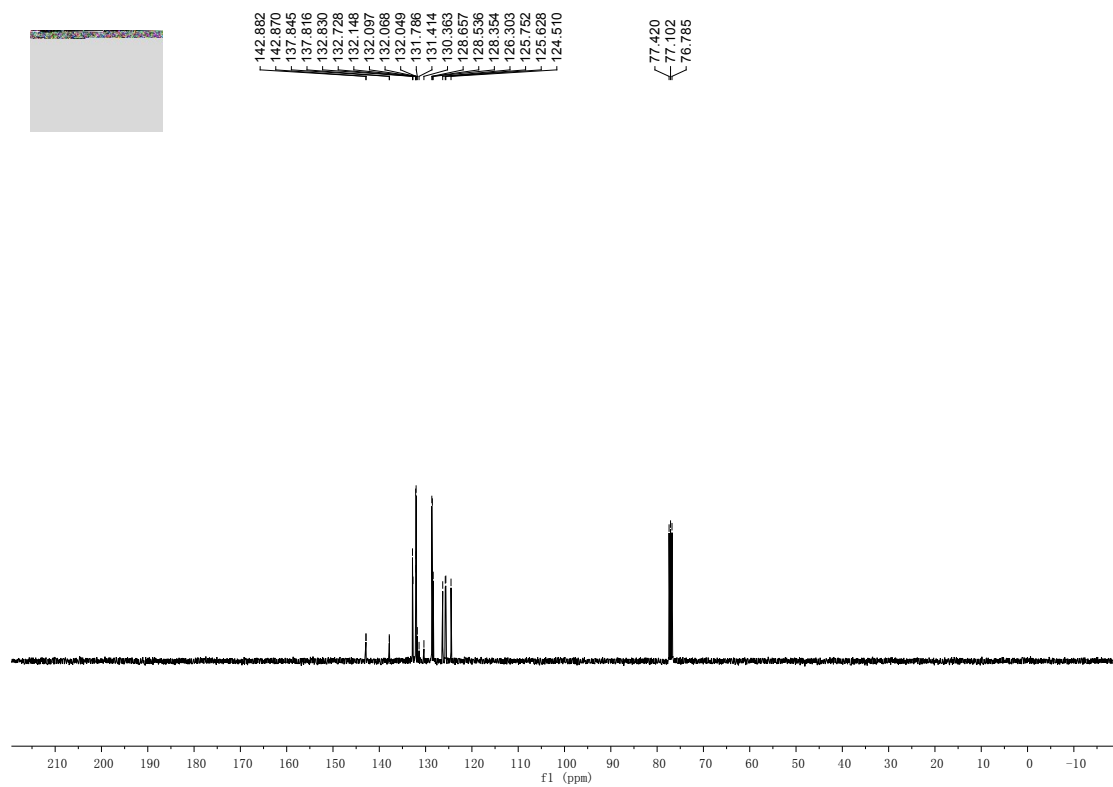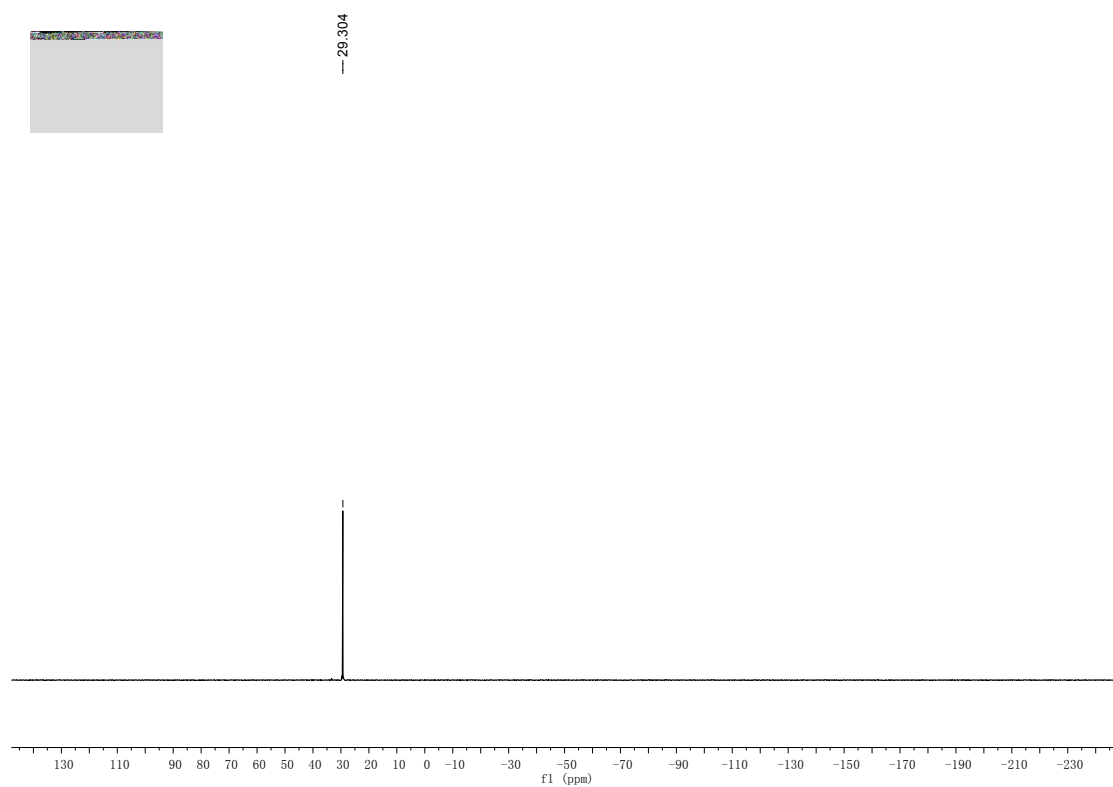

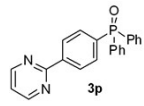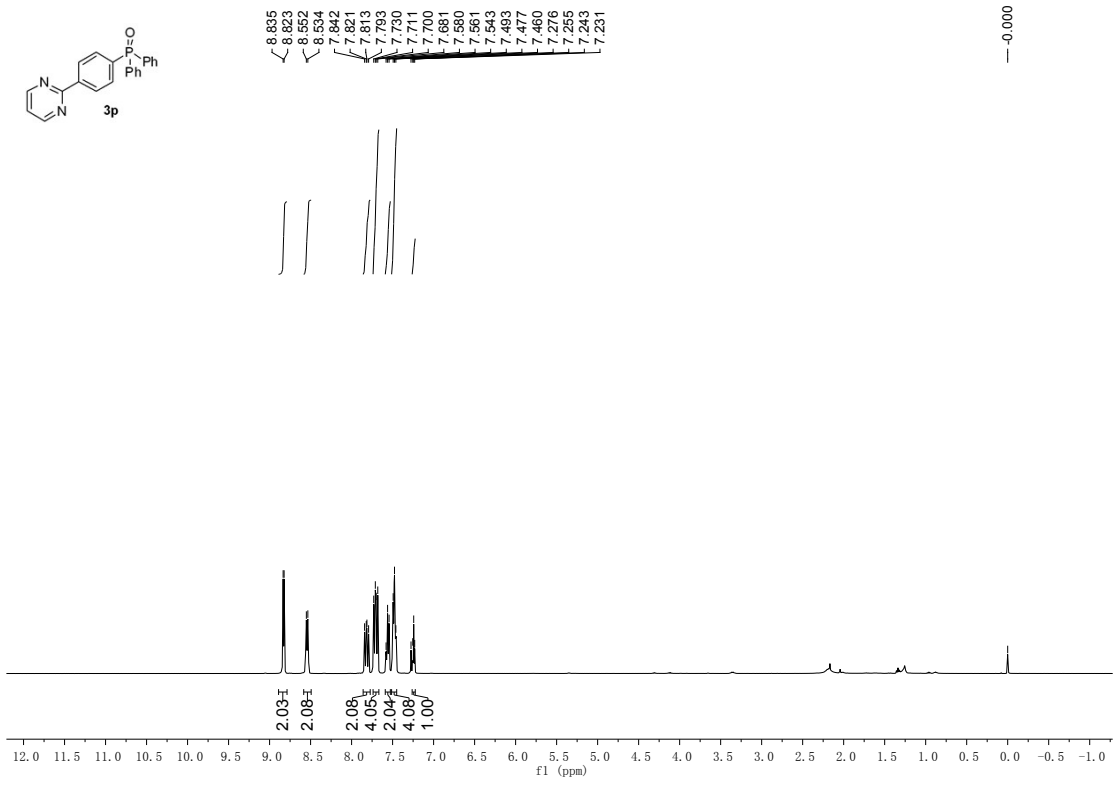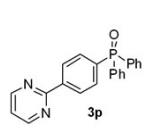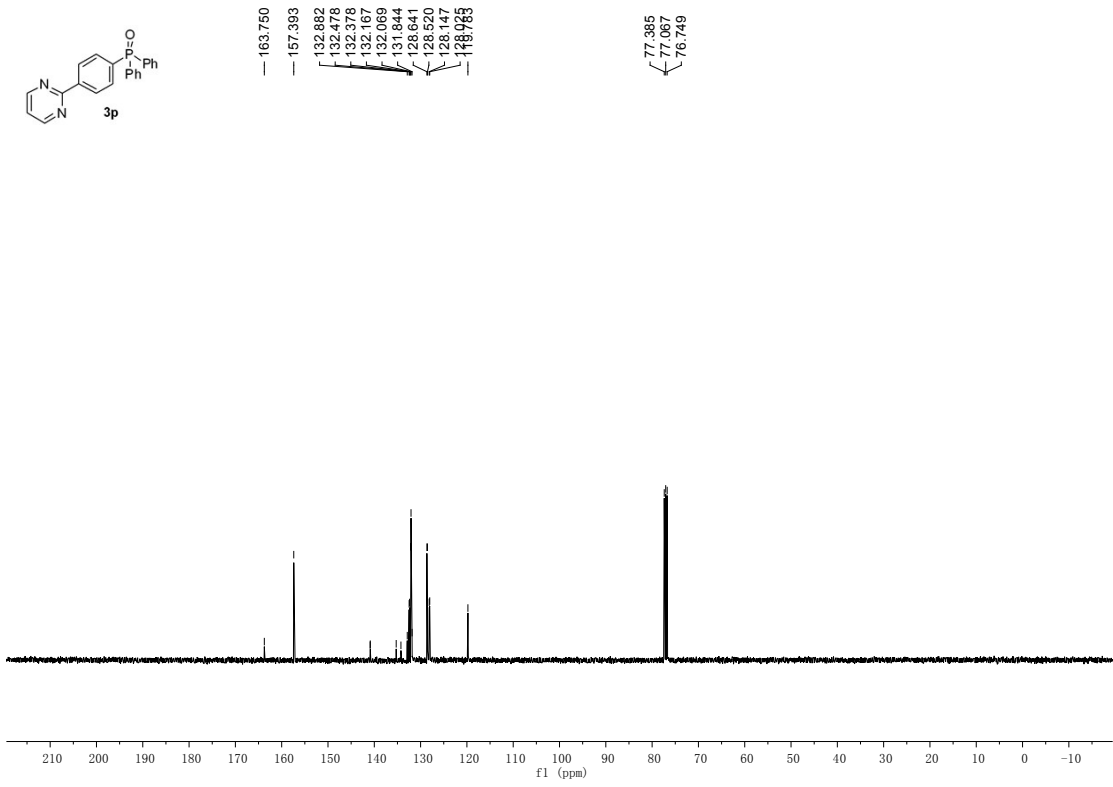

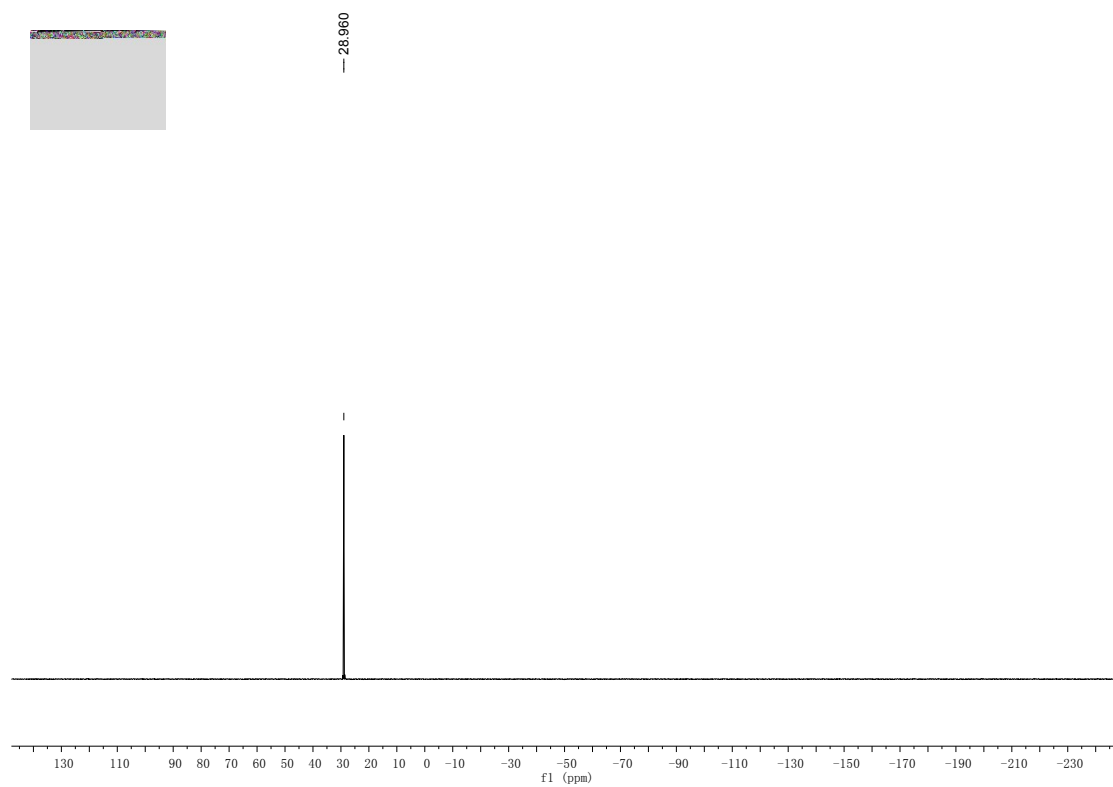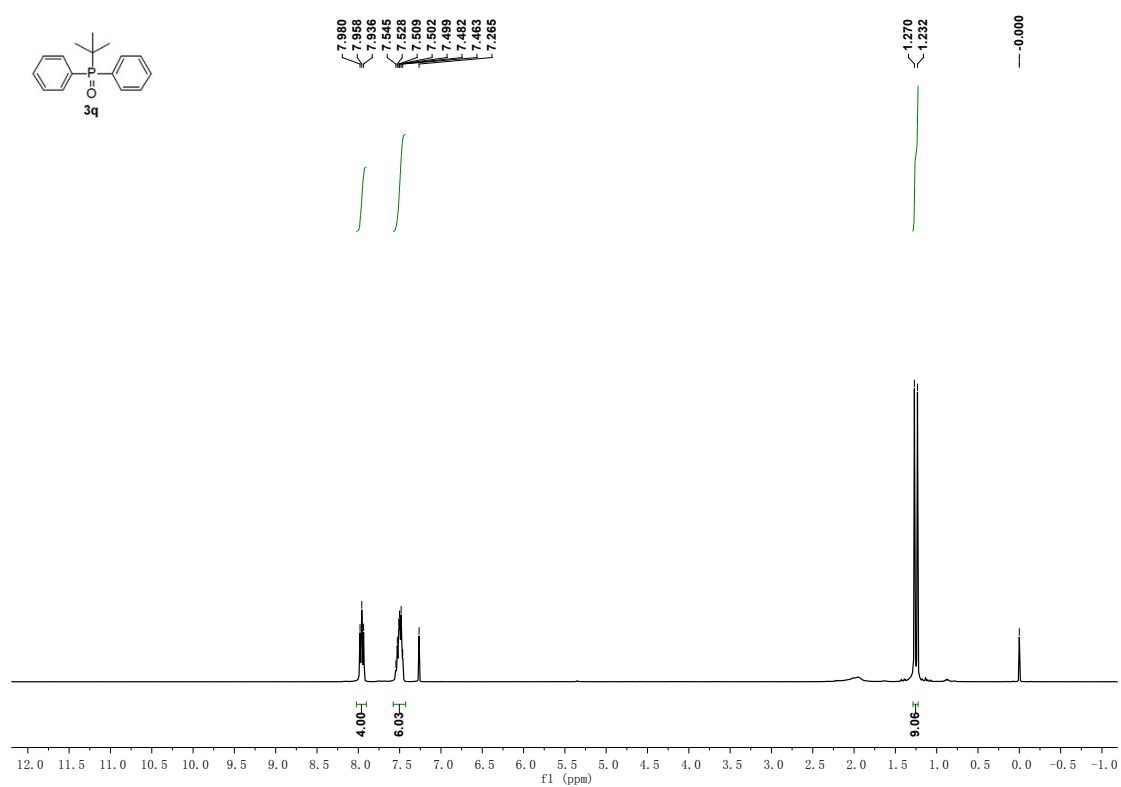

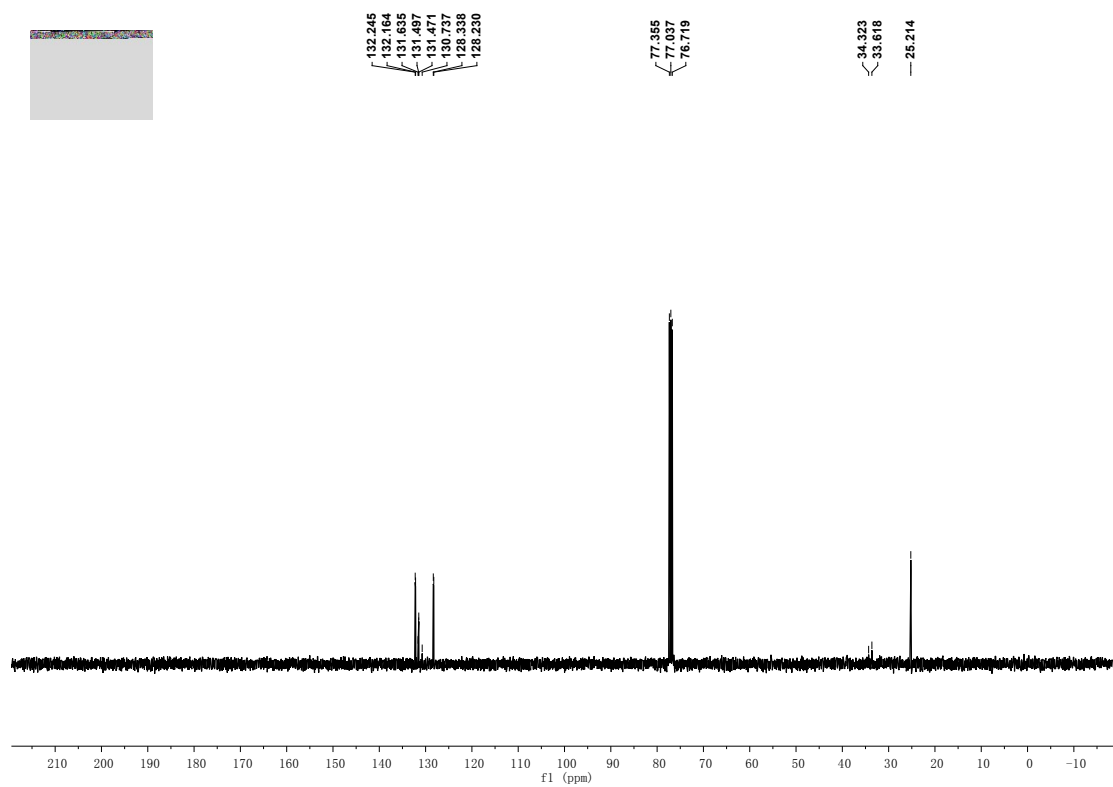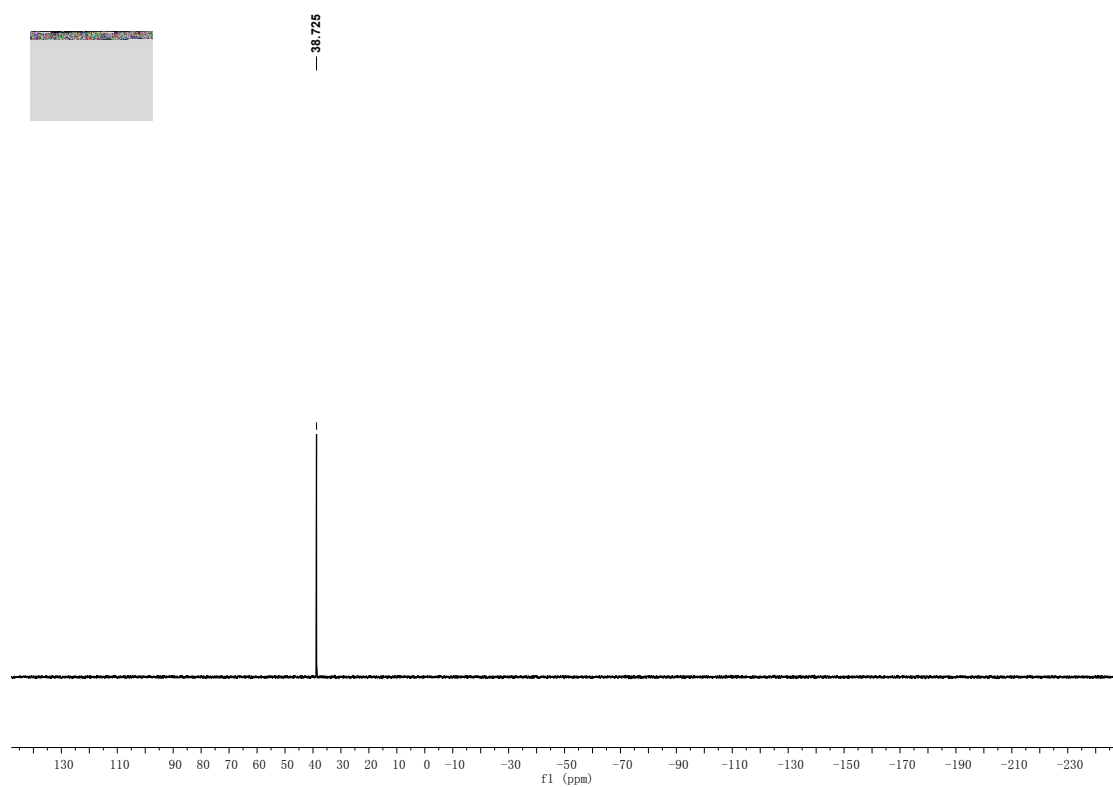



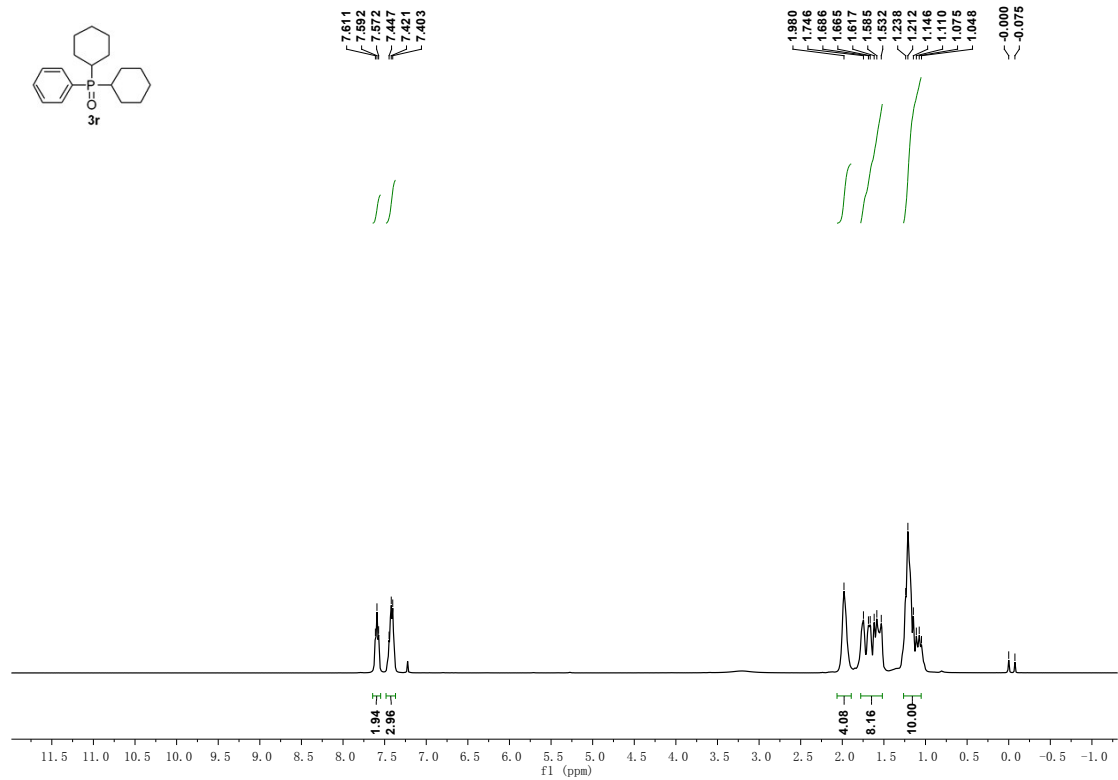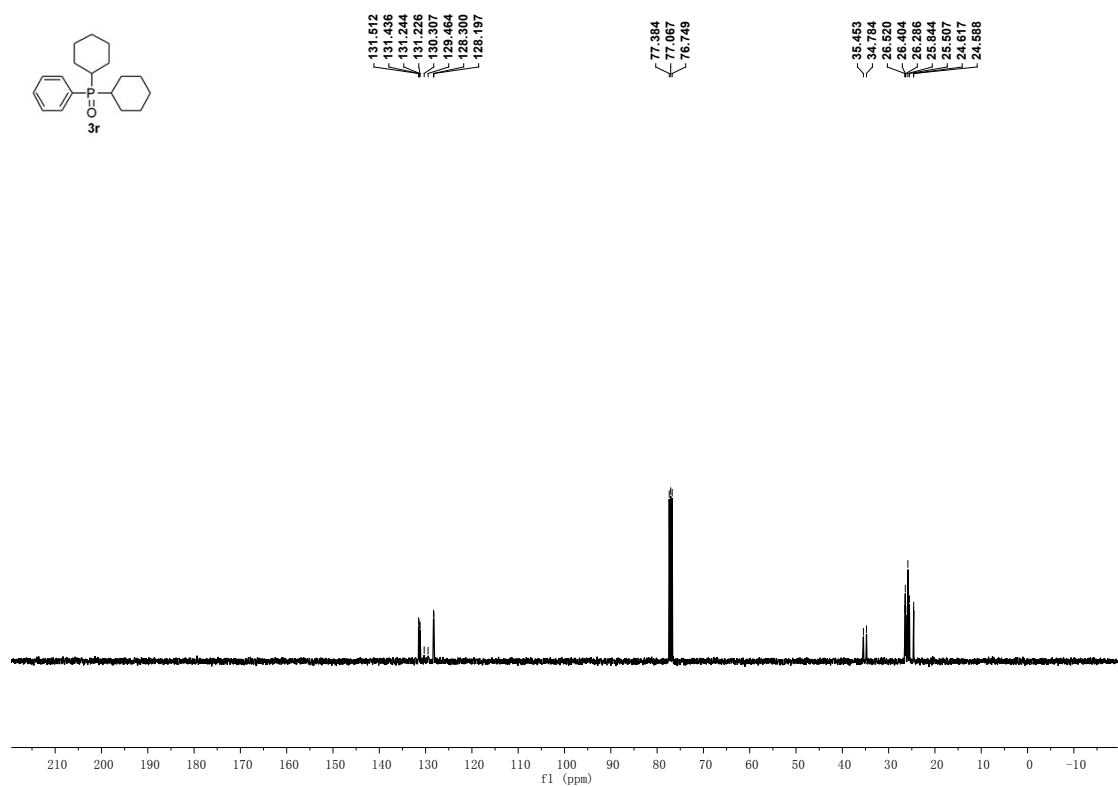

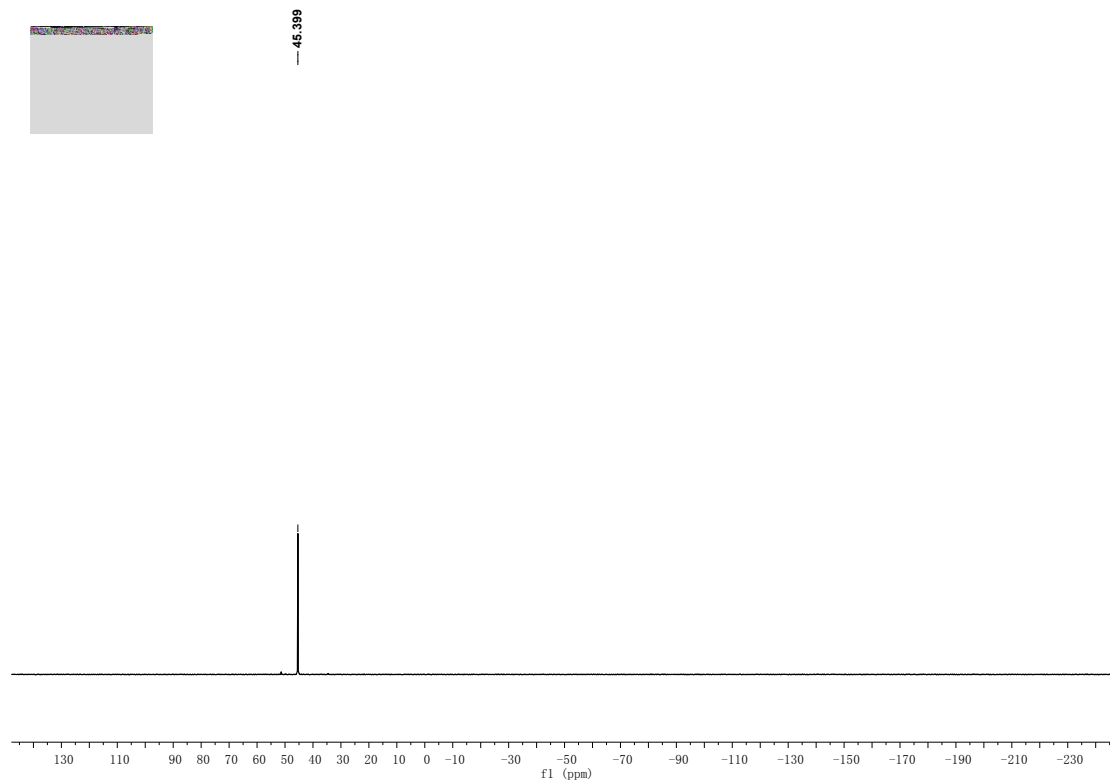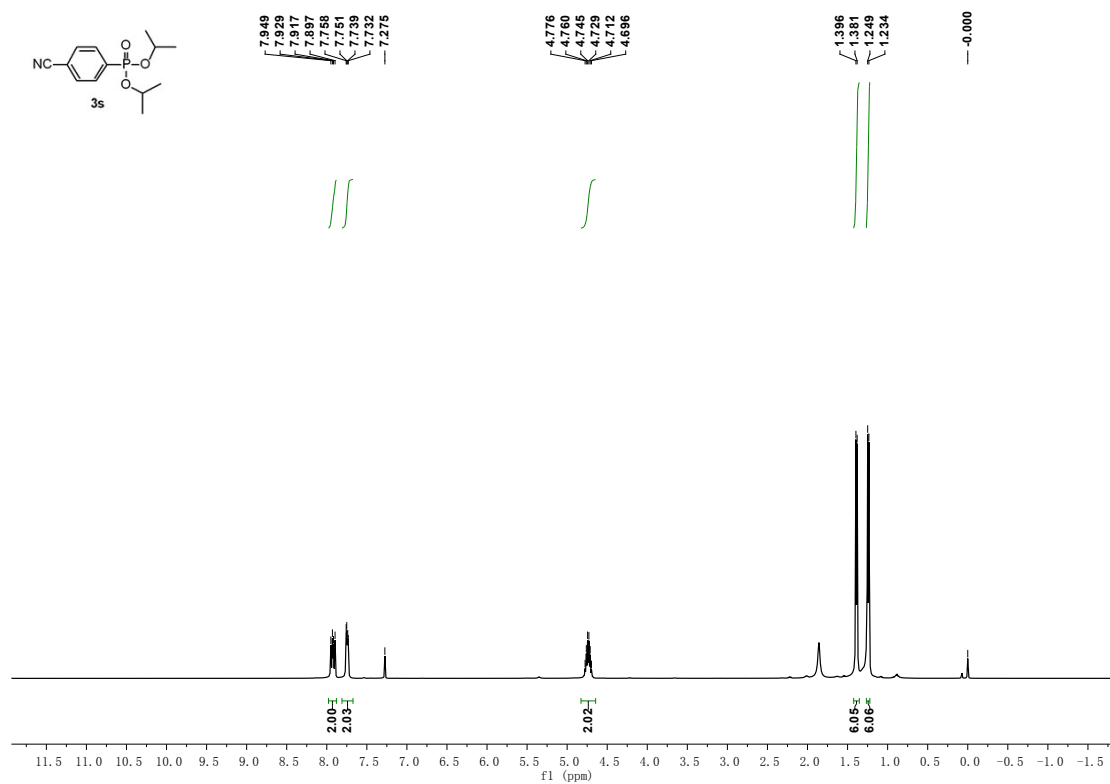

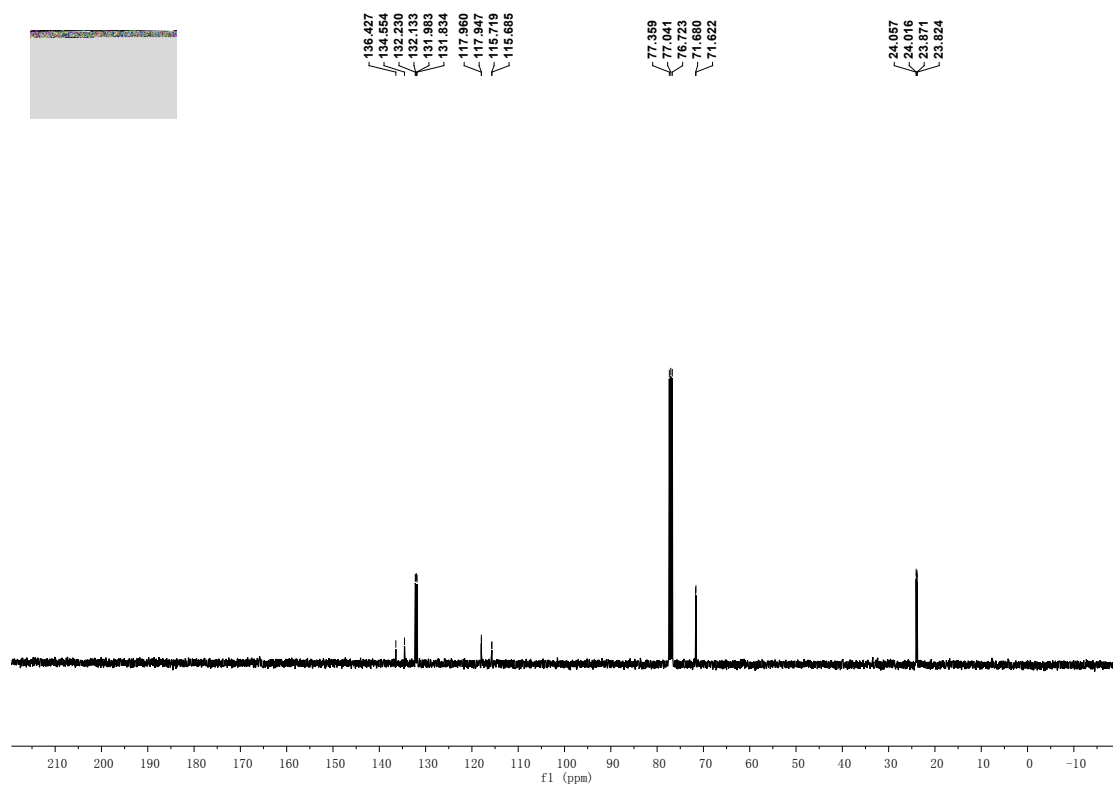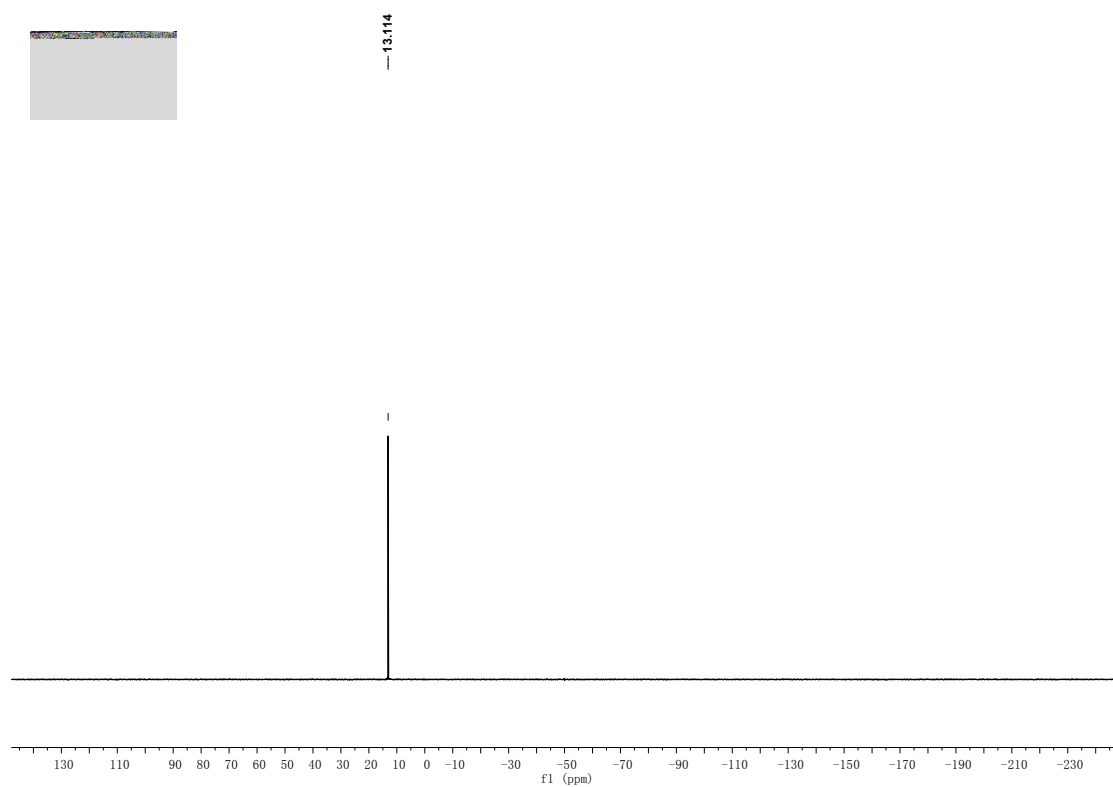

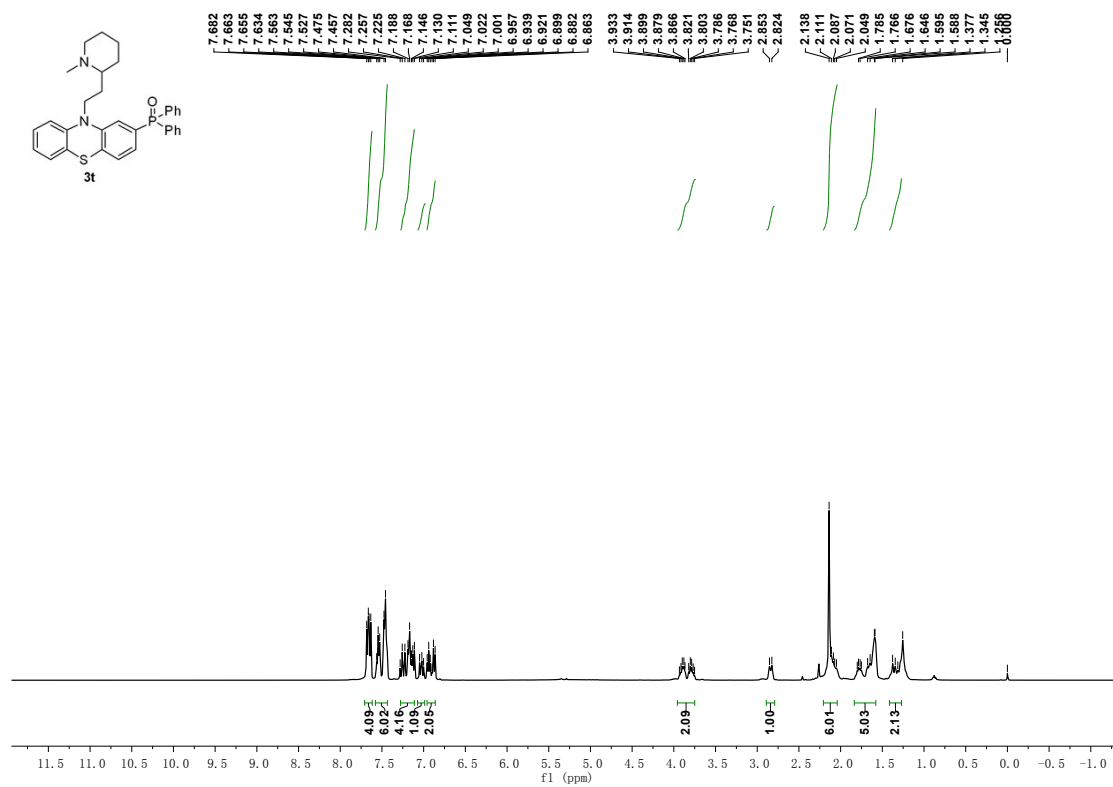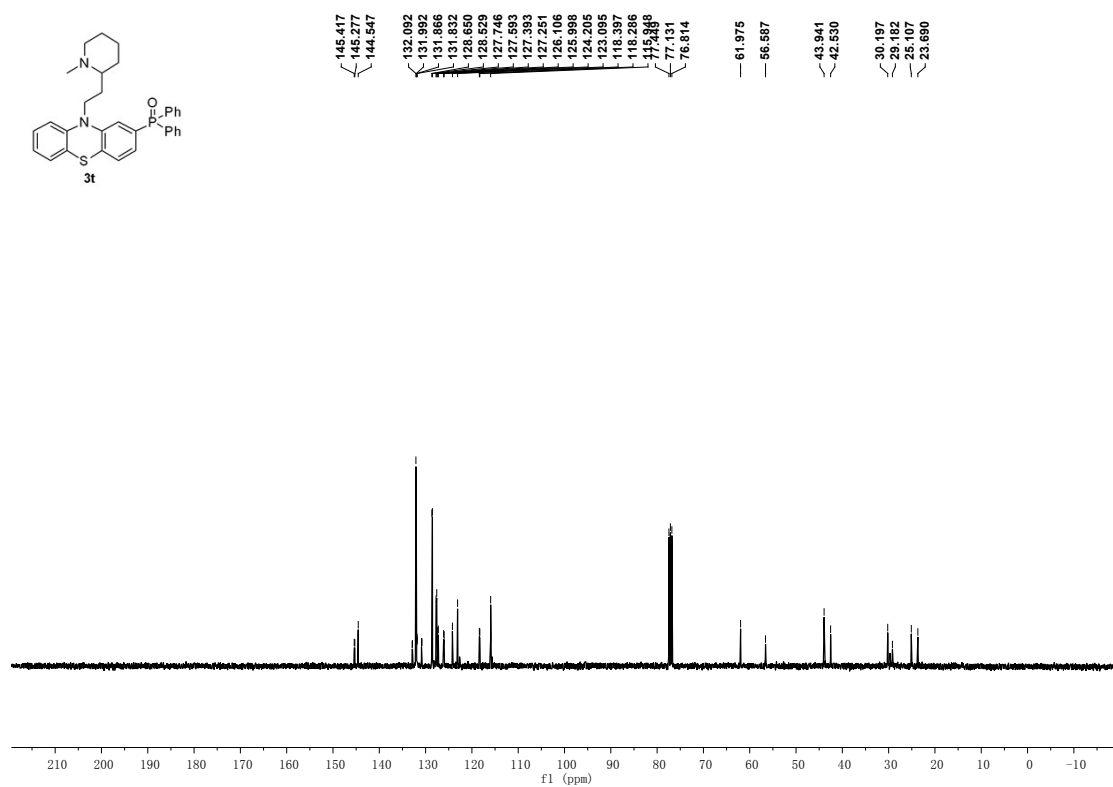

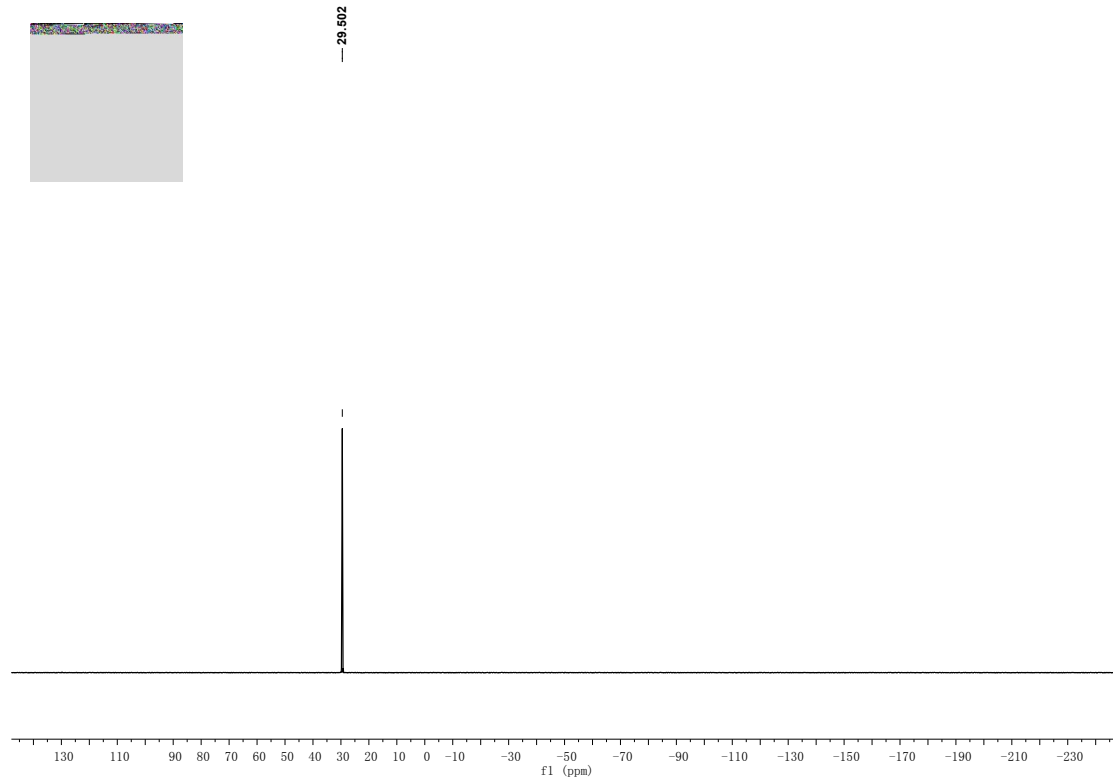

## 7. Copies of IR spectra

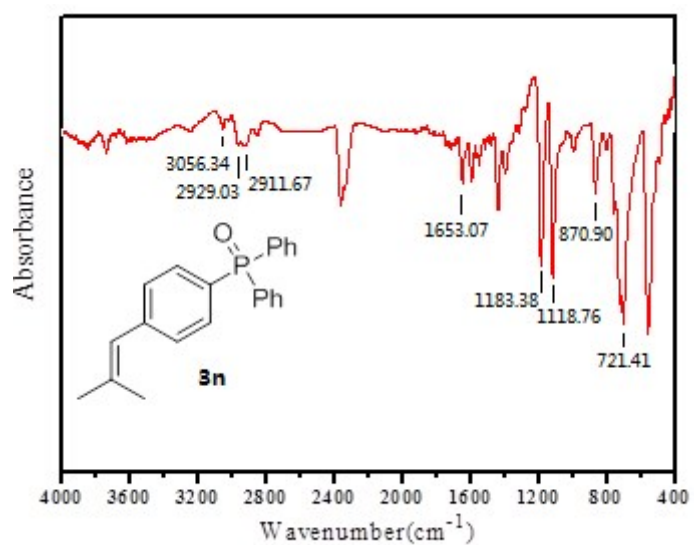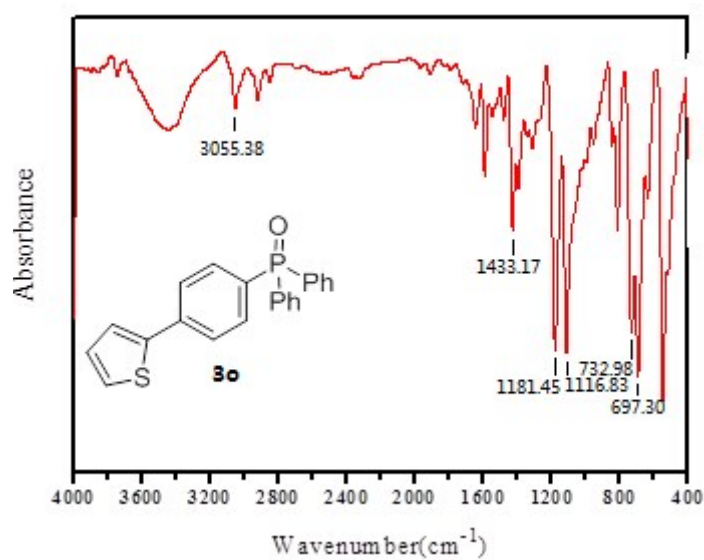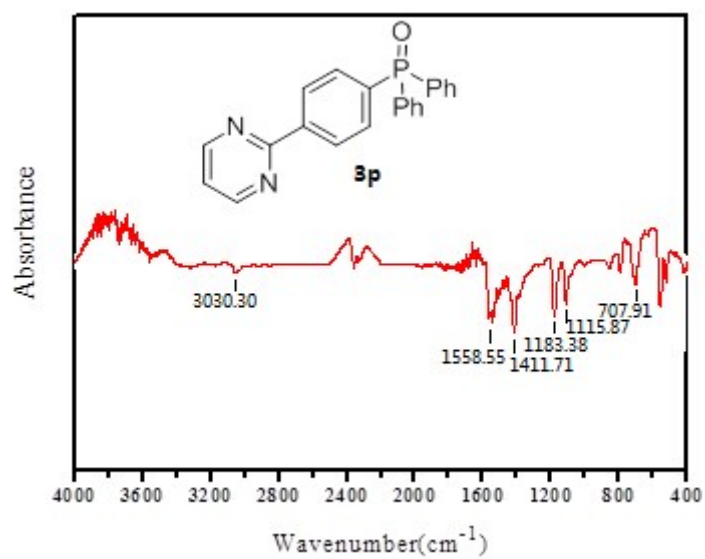

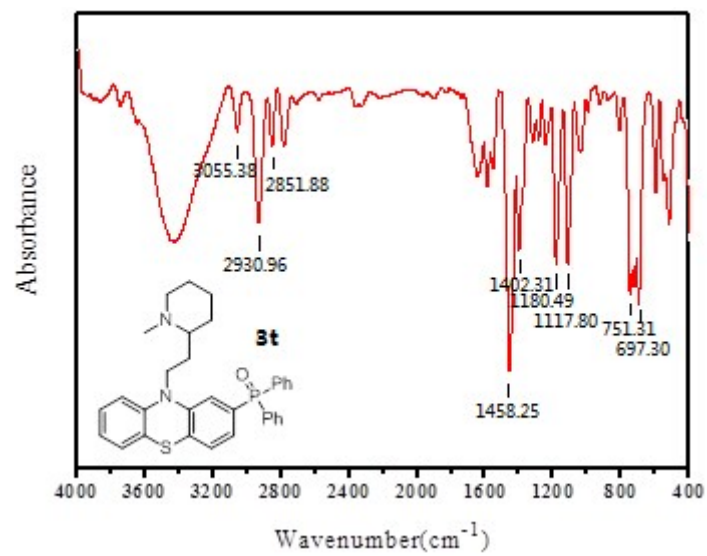

Supplement: c6cc06048j1.pdf [file c6cc06048j1.pdf]
